# Supplementary material for: Copper-catalyzed decarboxylative cross-coupling of cinnamic acids and ACCN via single electron transfer
Source: Royal Society of Chemistry journal article supplement (doi:10.1039/c5ob02677f), 2016-01-01

Supporting Information for:

## **Copper-catalyzed decarboxylative cross-coupling of cinnamic acids and ACCN *via* single electron transfer**

**Bao Gao,<sup>a,b</sup> Yinjun Xie,<sup>a</sup> Lei Yang,<sup>a</sup> Hanmin Huang<sup>\*a</sup>**

<sup>a</sup>State Key Laboratory for Oxo Synthesis and Selective Oxidation, Lanzhou Institute of Chemical Physics, Chinese Academy of Sciences, Lanzhou 730000, P. R. China

<sup>b</sup>University of Chinese Academy of Sciences, Beijing 100049, P. R. China

*E-mail: hmhuang@licp.cas.cn*

### **CONTENTS**

- 1 General experimental details and materials**
- 2 Optimization of the reaction conditions**
- 3 General procedure for the synthesis of  $\beta$ - $\gamma$  unsaturated nitriles**
- 4 Experimental characterization data for products**
- 5 Copies for  $^1\text{H}$  NMR and  $^{13}\text{C}$  NMR of the products**

## 1. General experiment details and materials

**Experimental:** All non-aqueous reactions and manipulations were using standard Schlenk techniques. All solvents before use were dried and degassed by standard methods and stored under argon atmosphere. All reactions were monitored by TLC with silica gel-coated plates. NMR spectra were recorded on BRUKER Avance III 400 MHz spectrometers. Chemical shifts were reported in parts per million (ppm) down field from TMS with the solvent resonance as the internal standard. Coupling constants (J) were reported in Hz and referred to apparent peak multiplications. High resolution mass spectra (HRMS) were recorded on Bruker MicroTOF-QII mass instrument(ESI). Cinnamic acids and 1,1'-azobis(cyclohexanecarbonitrile) (ACCN) used here were known compounds and purchased from Sigma-Aldrich or Alfa aesar. The substrates **1k-1r** were prepared according to the reported methods<sup>1-3</sup>.

## 2. Optimization of the reaction conditions

Cinnamic acid **1a** (0.5 mmol, 74 mg), ACCN (**2a**) (0.5 mmol, 122 mg), DABCO (0.75 mmol, 84 mg), silver salt, [Cu] were added to a 25 mL flame-dried Young-type tube. The tube was replaced with nitrogen atmosphere three times and 2 mL of xylene were added under nitrogen atmosphere, and then stirred at 100 °C for 24 hours. After evaporation of the solvent under reduced pressure, yields of product **3a** were determined by GC using *n*-hexadecane as an internal standard.

**Table S1** Screening of catalyst<sup>a</sup>

| Entry    | [Cu]                                   | Yield(%) <sup>b</sup> |
|----------|----------------------------------------|-----------------------|
| 1        | CuTc                                   | 31                    |
| 2        | Cu(OTf) <sub>2</sub>                   | 20                    |
| 3        | CuBr                                   | 34                    |
| <b>4</b> | <b>CuBr<sub>2</sub></b>                | <b>36</b>             |
| 5        | CuF <sub>2</sub>                       | 31                    |
| 6        | Cu(acac) <sub>2</sub>                  | 6                     |
| 7        | Cu <sub>2</sub> O                      | 25                    |
| 8        | CuSO <sub>4</sub> ·5H <sub>2</sub> O   | 15                    |
| 9        | Cu(OAc) <sub>2</sub>                   | 31                    |
| 10       | CuCl <sub>2</sub>                      | 33                    |
| 11       | CuCl                                   | 11                    |
| 12       | Cu(BF <sub>4</sub> )·6H <sub>2</sub> O | 30                    |
| 13       | Cu(2-ethylhexanoate)                   | 18                    |

<sup>a</sup>Reaction conditions: cinnamic acid **1a** (0.5 mmol), ACCN **2a** (0.5 mmol), DABCO (0.75 mmol), Ag<sub>2</sub>CO<sub>3</sub> (0.5 mmol), [Cu] (10 mol%), xylene (2 mL), 100 °C, 10 h. <sup>b</sup> yield determined by GC using *n*-hexadecane as an internal standard.

**Table S2** Screening of oxidant<sup>a</sup>

| Entry    | Oxidant                         | Yield(%) <sup>b</sup> |
|----------|---------------------------------|-----------------------|
| <b>1</b> | <b>AgOAc</b>                    | <b>38</b>             |
| 2        | AgOTf                           | 26                    |
| 3        | AgF                             | 19                    |
| 4        | AgClO <sub>4</sub>              | trace                 |
| 5        | AgBrO <sub>3</sub>              | 19                    |
| 6        | Ag <sub>2</sub> CO <sub>3</sub> | 36                    |

<sup>a</sup>Reaction conditions: cinnamic acid **1a** (0.5 mmol), ACCN **2a**(0.5 mmol), DABCO (0.75 mmol), oxidant (1.0 mmol), CuBr<sub>2</sub> (10 mol%), xylene (2 mL), 100 °C, 10 h. <sup>b</sup> yield determined by GC using *n*-hexadecane as an internal standard.

**Table S3** Screening of the amount of AgOAc<sup>a</sup>

| Entry    | The amount of AgOAc | Yield(%) <sup>b</sup> |
|----------|---------------------|-----------------------|
| 1        | 0.5 equiv           | 31                    |
| <b>2</b> | <b>1.0 equiv</b>    | <b>40</b>             |
| 3        | 2.0 equiv           | 38                    |
| 4        | 3.0 equiv           | 38                    |

<sup>a</sup>Reaction conditions: cinnamic acid **1a** (0.5 mmol), ACCN **2a** (0.5 mmol), DABCO (0.75 mmol), AgOAc, CuBr<sub>2</sub> (10 mol%), xylene(2 mL), 100 °C, 10 h. <sup>b</sup> yield determined by GC using *n*-hexadecane as an internal standard.

**Table S4** Screening of the amount of CuBr<sub>2</sub><sup>a</sup>

| Entry    | The amount of CuBr <sub>2</sub> | Yield(%) <sup>b</sup> |
|----------|---------------------------------|-----------------------|
| 1        | 5 mol%                          | 33                    |
| 2        | 10 mol%                         | 40                    |
| <b>3</b> | <b>20 mol%</b>                  | <b>44</b>             |
| 4        | 30 mol%                         | 41                    |

<sup>a</sup>Reaction conditions: cinnamic acid **1a** (0.5 mmol), ACCN **2a** (0.5 mmol), DABCO (0.75 mmol), AgOAc (0.5 mmol), CuBr<sub>2</sub>, xylene (2 mL), 100 °C, 10 h. <sup>b</sup> yield determined by GC using *n*-hexadecane as an internal standard.

**Table S5** The effect of reaction time<sup>a</sup>

| Entry    | t (h)     | Yield(%) <sup>b</sup> |
|----------|-----------|-----------------------|
| 1        | 10        | 44                    |
| 2        | 18        | 45                    |
| <b>3</b> | <b>24</b> | <b>55</b>             |

<sup>a</sup>Reaction conditions: cinnamic acid **1a** (0.5 mmol), ACCN **2a** (0.5 mmol), DABCO (0.75 mmol), AgOAc (0.5 mmol), CuBr<sub>2</sub> (20 mol%), xylene(2 mL), 100 °C. <sup>b</sup> yield determined by GC using *n*-hexadecane as an internal standard.

**Table S6** The effect of other oxidant<sup>a</sup>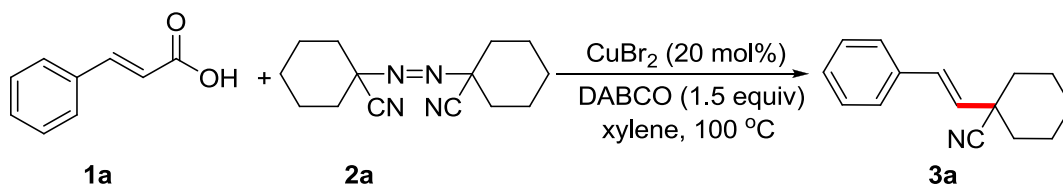

| Entry | Oxidant                                       | Yield(%) <sup>b</sup> |
|-------|-----------------------------------------------|-----------------------|
| 1     | Na <sub>2</sub> S <sub>2</sub> O <sub>8</sub> | 22                    |
| 2     | K <sub>2</sub> S <sub>2</sub> O <sub>8</sub>  | 31                    |
| 3     | Oxone                                         | 24                    |
| 4     | BQ                                            | trace                 |
| 5     | TBHP                                          | 13                    |
| 6     | DTBP                                          | 14                    |

<sup>a</sup>Reaction conditions: cinnamic acid **1a** (0.5 mmol), ACCN **2a** (0.5 mmol), DABCO (0.75 mmol), Oxidant (0.5 mmol), CuBr<sub>2</sub> (20 mol%), xylene(2 mL), 100 °C, 24 h. <sup>b</sup> yield determined by GC using *n*-hexadecane as an internal standard.

**Table S7** The effect of solvent<sup>a</sup>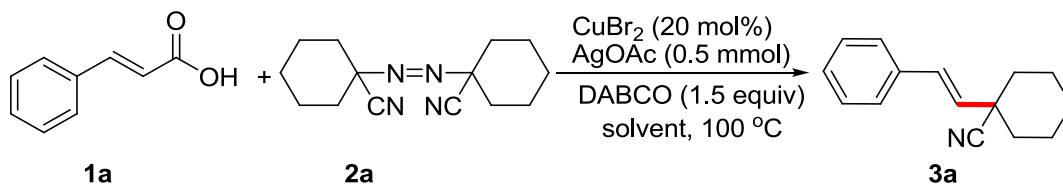

| Entry | solvent                         | Yield(%) <sup>b</sup> |
|-------|---------------------------------|-----------------------|
| 1     | THF                             | 27                    |
| 2     | 1,4-dioxane                     | 49                    |
| 3     | CH <sub>3</sub> NO <sub>2</sub> | nr                    |
| 4     | CH <sub>3</sub> CN              | 45                    |
| 5     | CH <sub>3</sub> OH              | 19                    |
| 6     | DCE                             | 11                    |

<sup>a</sup>Reaction conditions: cinnamic acid **1a** (0.5 mmol), ACCN **2a** (0.5 mmol), DABCO (0.75 mmol), AgOAc (0.5 mmol), CuBr<sub>2</sub> (20 mol%), solvent (2 mL), 100 °C, 24 h. <sup>b</sup> yield determined by GC using *n*-hexadecane as an internal standard.

### 3. General procedure for the decarboxylation coupling

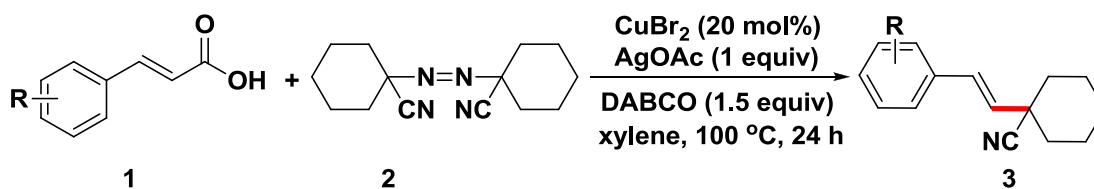

Cinnamic acid (0.5 mmol), ACCN (0.5 mmol, 122 mg), DABCO (1.5 mmol, 84 mg),  $\text{AgOAc}$  (0.5 mmol, 84 mg),  $\text{CuBr}_2$  (0.1 mmol, 20 mol%) were added to a 25 mL flame-dried Young-type tube. The tube was replaced with nitrogen atmosphere three times and 2 mL of xylene were added under nitrogen atmosphere, and then stirred at 100 °C for 24 hours. After evaporation of the solvent under reduced pressure, the residue was purified by flash column chromatography on silica gel to give the desired product **3**.

#### 4. Experimental characterization data for products

**(E)-1-styrylcyclohexanecarbonitrile (3a):** The title compound was prepared according

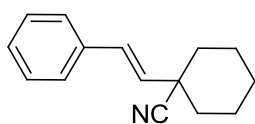

to the general procedure and purified by flash column chromatography to give a white solid, 54.5 mg, 52% yield.  $^1\text{H}$  NMR (400 MHz,  $\text{CDCl}_3$ )  $\delta$  7.24-7.39 (m, 5H), 6.78 (d,  $J = 16$  Hz, 1H), 5.99 (d,  $J = 16$  Hz, 1H), 2.01 (d,  $J = 12.8$  Hz, 2H), 1.66-1.81 (m, 5H), 1.47-1.55 (m, 2H), 1.19-1.28 (m, 1H);  $^{13}\text{C}$  NMR (100 MHz,  $\text{CDCl}_3$ )  $\delta$  136.1, 130.4, 130.2, 128.7, 128.1, 126.6, 122.1, 41.7, 36.4, 24.9, 22.9; HRMS (ESI) calcd. for  $\text{C}_{15}\text{H}_{17}\text{NNa}$  [ $\text{M}+\text{Na}$ ]: 234.1253, found: 234.1254.

**(E)-1-(4-methylstyryl)cyclohexanecarbonitrile (3b):** The title compound was prepared

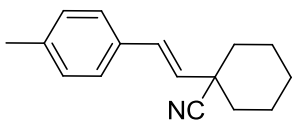

according to the general procedure and purified by flash column chromatography to give a white solid, 66.4 mg, 59% yield.  $^1\text{H}$  NMR (400 MHz,  $\text{CDCl}_3$ )  $\delta$  7.26 (d,  $J = 8.0$  Hz, 2H), 7.12 (d,  $J = 8.0$  Hz, 2H), 6.74 (d,  $J = 16.0$  Hz, 1H), 5.94 (d,  $J = 16.0$  Hz, 1H), 2.33 (s, 3H), 2.0 (d,  $J = 12.8$  Hz, 2H), 1.66-1.80 (m, 5H), 1.47-1.54 (m, 2H), 1.18-1.29 (m, 1H);  $^{13}\text{C}$  NMR (100 MHz,  $\text{CDCl}_3$ )  $\delta$  138.0, 133.3, 130.1, 129.4, 129.4, 126.5, 122.2, 41.6, 36.5, 24.9, 22.9, 21.2; HRMS (ESI) calcd. for  $\text{C}_{16}\text{H}_{19}\text{NNa}$  [ $\text{M}+\text{Na}$ ]: 248.1410, found: 248.1411.

**(E)-1-(4-methoxystyryl)cyclohexanecarbonitrile (3c):** The title compound was

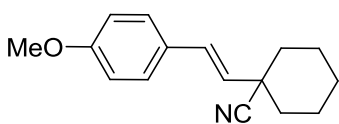

prepared according to the general procedure and purified by flash column chromatography to give a white solid, 67.0 mg, 56% yield.  $^1\text{H}$  NMR (400 MHz,  $\text{CDCl}_3$ )  $\delta$  7.30-7.34 (m, 2H), 6.85-6.88 (m, 2H), 6.71 (d,  $J = 16.0$  Hz, 1H), 5.86 (d,  $J = 16.0$  Hz, 1H), 3.81 (s, 3H), 2.01 (d,  $J = 12.8$  Hz, 2H), 1.65-1.81 (m, 5H), 1.47-1.54 (m, 2H), 1.18-1.29 (m, 1H);  $^{13}\text{C}$  NMR (100 MHz,  $\text{CDCl}_3$ )  $\delta$  159.5, 129.6, 128.8, 128.2, 127.7, 122.3, 114.1, 55.3, 41.6, 36.5, 24.9, 22.9; HRMS (ESI) calcd. for  $\text{C}_{16}\text{H}_{19}\text{NONa}$  [ $\text{M}+\text{Na}$ ]: 264.1359, found: 264.1365.

**(E)-1-(3,4-dimethoxystyryl)cyclohexanecarbonitrile (3d):** The title compound was prepared according to the general procedure and purified by flash column

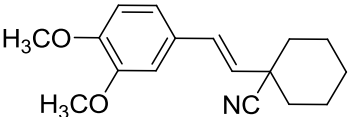
 chromatography to give a white solid, 86.6 mg, 64% yield.  $^1\text{H}$  NMR (400 MHz,  $\text{CDCl}_3$ )  $\delta$  6.92-6.95 (m, 2H), 6.82 (d,  $J = 8.0$  Hz, 1H), 6.71 (d,  $J = 16.0$  Hz, 1H), 5.87 (d,  $J = 16.0$  Hz, 1H), 3.91 (s, 3H), 3.88 (s, 3H), 2.01 (d,  $J = 12.8$  Hz, 2H), 1.66-1.81 (m, 5H), 1.49-1.56 (m, 2H), 1.19-1.27 (m, 1H);  $^{13}\text{C}$  NMR (100 MHz,  $\text{CDCl}_3$ )  $\delta$  149.1, 149.1, 129.9, 129.0, 128.4, 122.2, 119.7, 111.2, 109.0, 55.9, 55.9, 41.6, 36.5, 24.9, 22.9; HRMS (ESI) calcd. for  $\text{C}_{17}\text{H}_{21}\text{NONa}$   $[\text{M}+\text{Na}]$ : 294.1465, found: 294.1465.

**(E)-1-(3,4,5-trimethoxystyryl)cyclohexanecarbonitrile (3e):** The title compound was prepared according to the general procedure and purified by flash column chromatography to give a white solid, 85.6 mg, 57% yield.  $^1\text{H}$  NMR (400 MHz,  $\text{CDCl}_3$ )  $\delta$  6.71 (d,  $J = 16.0$  Hz, 1H), 6.61 (s, 2H), 5.91 (d,  $J = 16.0$  Hz, 1H), 3.89 (s, 6H), 3.85 (s, 3H), 2.02 (d,  $J = 13.2$  Hz, 2H), 1.67-1.83 (m, 5H), 1.50-1.57 (m, 2H), 1.20-1.30 (m, 1H);  $^{13}\text{C}$  NMR (100 MHz,  $\text{CDCl}_3$ )  $\delta$  153.4, 138.2, 131.7, 130.2, 129.8, 122.1, 103.6, 61.0, 56.1, 41.7, 36.5, 24.9, 22.9; HRMS (ESI) calcd. for  $\text{C}_{18}\text{H}_{23}\text{NO}_3\text{Na}$   $[\text{M}+\text{Na}]$ : 324.1570, found: 324.1582.

**(E)-1-(4-chlorostyryl)cyclohexanecarbonitrile (3f):** The title compound was prepared according to the general procedure and purified by flash column chromatography to give a white solid, 55.0 mg, 45% yield.  $^1\text{H}$  NMR (400 MHz,  $\text{CDCl}_3$ )  $\delta$  7.27-7.32 (m, 4H), 6.73 (d,  $J = 16.0$  Hz, 1H), 5.97 (d,  $J = 16.0$  Hz, 1H), 2.01 (d,  $J = 12.8$  Hz, 2H), 1.66-2.00 (m, 5H), 1.48-1.55 (m, 2H), 1.21-1.28 (m, 1H);  $^{13}\text{C}$  NMR (100 MHz,  $\text{CDCl}_3$ )  $\delta$  134.5, 133.7, 131.0, 129.1, 128.9, 127.8, 121.9, 41.7, 36.3, 24.9, 22.9; HRMS (ESI) calcd. for  $\text{C}_{15}\text{H}_{16}\text{ClNNa}$   $[\text{M}+\text{Na}]$ : 268.0863, found: 268.0855

**(E)-1-(3-chlorostyryl)cyclohexanecarbonitrile (3g):** The title compound was prepared according to the general procedure and purified by flash column chromatography to give a white solid, 51mg, 42% yield.  $^1\text{H}$  NMR (400 MHz,  $\text{CDCl}_3$ )  $\delta$  7.38 (s, 1H), 7.22-7.38 (m, 3H), 6.73 (d,  $J = 16.0$  Hz, 1H), 6.00 (d,  $J = 16.0$  Hz, 1H), 2.01 (d,  $J = 12.4$  Hz, 2H), 1.67-2.00 (m,



5H), 1.48-1.55 (m, 2H), 1.22-1.28 (m, 1H);  $^{13}\text{C}$  NMR (100 MHz,  $\text{CDCl}_3$ )  $\delta$  137.9, 134.6, 131.8, 129.9, 129.0, 128.0, 126.3, 125.0, 121.8, 41.7, 36.3, 24.9, 22.8; HRMS (ESI) calcd. for  $\text{C}_{15}\text{H}_{16}\text{ClNNa}$  [ $\text{M}+\text{Na}$ ]: 268.0863, found: 268.0854.

**(E)-1-(2-chlorostyryl)cyclohexanecarbonitrile (3h):** The title compound was prepared

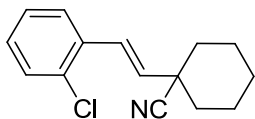

according to the general procedure and purified by flash column chromatography to give a white solid, 56.0 mg, 46% yield.  $^1\text{H}$  NMR (400 MHz,  $\text{CDCl}_3$ )  $\delta$  7.46-7.49 (m, 1H), 7.35-7.38 (m,

1H), 7.20-7.26 (m, 2H), 7.14 (d,  $J = 16.0$  Hz, 1H), 6.00 (d,  $J = 16.0$  Hz, 1H), 2.06 (d,  $J = 12.4$  Hz, 2H), 1.68-1.83 (m, 5H), 1.51-1.60 (m, 2H), 1.21-1.30 (m, 1H);  $^{13}\text{C}$  NMR (100 MHz,  $\text{CDCl}_3$ )  $\delta$  134.3, 133.4, 133.2, 129.8, 129.1, 127.0, 126.9, 126.9, 121.9, 41.6, 36.2, 24.9, 22.8; HRMS (ESI) calcd. for  $\text{C}_{15}\text{H}_{16}\text{ClNNa}$  [ $\text{M}+\text{Na}$ ]: 268.0863, found: 268.0854.

**(E)-1-(4-bromostyryl)cyclohexanecarbonitrile (3i):** The title compound was prepared

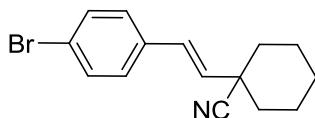

according to the general procedure and purified by flash column chromatography to give a white solid, 63.0 mg, 43% yield.  $^1\text{H}$  NMR (400 MHz,  $\text{CDCl}_3$ )  $\delta$  7.43-7.46 (m, 2H),

7.23-7.26 (m, 2H), 6.71 (d,  $J = 16.0$  Hz, 1H), 5.98 (d,  $J = 16.0$  Hz, 1H), 2.00 (d,  $J = 12.8$  Hz, 2H), 1.65-2.00 (m, 5H), 1.47-1.55 (m, 2H), 1.21-1.28 (m, 1H);  $^{13}\text{C}$  NMR (100 MHz,  $\text{CDCl}_3$ )  $\delta$  135.0, 131.8, 131.1, 129.1, 128.1, 121.9, 41.7, 36.3, 24.9, 22.9; HRMS (ESI) calcd. for  $\text{C}_{15}\text{H}_{16}\text{BrN}$  [ $\text{M}$ ]: 289.0461, found: 289.0450

**(E)-1-(3-nitrostyryl)cyclohexanecarbonitrile (3j):** The title compound was prepared

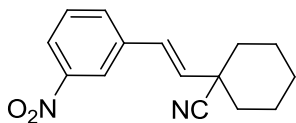

according to the general procedure and purified by flash column chromatography to give a white solid, 18.7 mg, 15% yield.  $^1\text{H}$  NMR (400 MHz,  $\text{CDCl}_3$ )  $\delta$  8.27 (s, 1H), 8.12 (d,  $J = 8.0$  Hz,

1H), 7.66 (d,  $J = 7.6$  Hz, 1H), 7.50-7.54 (m, 1H), 6.86 (d,  $J = 16.0$  Hz, 1H), 6.15 (d,  $J = 16.0$  Hz, 1H), 2.03 (d,  $J = 12.8$  Hz, 2H), 1.69-1.85 (m, 5H), 1.53-1.60 (m, 2H), 1.25-1.31 (m, 1H);  $^{13}\text{C}$  NMR (100 MHz,  $\text{CDCl}_3$ )  $\delta$  148.6, 137.8, 133.6, 132.8, 129.7, 128.2, 122.6, 121.5, 120.8, 41.9, 36.2, 24.8, 22.8; HRMS (ESI) calcd. for  $\text{C}_{15}\text{H}_{16}\text{N}_2\text{O}_2\text{Na}$  [ $\text{M}+\text{Na}$ ]: 279.1104, found: 279.1111.

**(E)-1-(2-(naphthalen-1-yl)vinyl)cyclohexanecarbonitrile (3k):** The title compound was

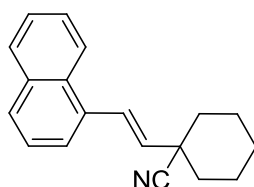

prepared according to the general procedure and purified by flash column chromatography to give a white solid, 68.6 mg, 53% yield.

$^1\text{H}$  NMR (400 MHz,  $\text{CDCl}_3$ )  $\delta$  8.11 (d,  $J$  = 0.8 Hz, 1H), 7.83-7.85 (m, 1H), 7.78 (d,  $J$  = 8.4 Hz, 1H), 7.41-7.58 (m, 5H), 6.00 (d,  $J$  = 15.6 Hz, 1H), 2.09 (d,  $J$  = 12.4 Hz, 2H), 1.69-1.83 (m, 5H), 1.53-1.60 (m, 2H), 1.21-1.31 (m, 1H);  $^{13}\text{C}$  NMR (100 MHz,  $\text{CDCl}_3$ )  $\delta$  133.9, 133.7, 133.6, 131.2, 128.6, 128.5, 127.8, 126.3, 126.0, 125.5, 124.0, 123.8, 122.2, 42.0, 36.5, 24.9, 22.9; HRMS (ESI) calcd. for  $\text{C}_{19}\text{H}_{19}\text{N}$  [M+Na]: 284.1410, found: 284.1419.

**(E)-1-(2-(pyridin-4-yl)vinyl)cyclohexanecarbonitrile (3l):** The title compound was

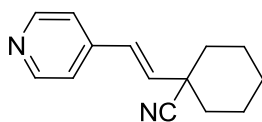

prepared according to the general procedure and purified by flash column chromatography to give a white solid, 27.0 mg, 26% yield.

$^1\text{H}$  NMR (400 MHz,  $\text{CDCl}_3$ )  $\delta$  8.57 (d,  $J$  = 5.2 Hz, 2H), 7.25-7.27 (m, 2H), 6.74 (d,  $J$  = 16.0 Hz, 1H), 6.21 (d,  $J$  = 16.0 Hz, 1H), 2.02 (d,  $J$  = 13.6 Hz, 2H), 1.68-1.84 (m, 5H), 1.50-1.58 (m, 2H), 1.23-1.30 (m, 1H);  $^{13}\text{C}$  NMR (100 MHz,  $\text{CDCl}_3$ )  $\delta$  150.2, 143.4, 135.0, 128.2, 121.5, 121.1, 41.9, 36.1, 24.8, 22.8; HRMS (ESI) calcd. for  $\text{C}_{14}\text{H}_{17}\text{N}_2$  [M+H]: 213.1386, found: 213.1379.

**(E)-1-(2-(pyridin-3-yl)vinyl)cyclohexanecarbonitrile (3m):** The title compound was

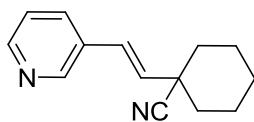

prepared according to the general procedure and purified by flash column chromatography to give a white solid, 65.1 mg, 61% yield.

$^1\text{H}$  NMR (400 MHz,  $\text{CDCl}_3$ )  $\delta$  8.63 (s, 1H), 8.50 (d,  $J$  = 4.4 Hz, 1H), 7.69 (d,  $J$  = 8.0 Hz, 1H), 7.26-7.29 (m, 1H), 6.78 (d,  $J$  = 16.4 Hz, 1H), 6.08 (d,  $J$  = 16.0 Hz, 1H), 2.03 (d,  $J$  = 13.2 Hz, 2H), 1.68-1.84 (m, 5H), 1.51-1.58 (m, 2H), 1.24-1.30 (m, 1H);  $^{13}\text{C}$  NMR (100 MHz,  $\text{CDCl}_3$ )  $\delta$  149.1, 148.3, 133.2, 132.6, 131.7, 126.9, 123.5, 121.7, 41.9, 36.2, 24.8, 22.8; HRMS (ESI) calcd. for  $\text{C}_{14}\text{H}_{17}\text{N}_2$  [M+H]: 213.1386, found: 213.1384.

**(E)-1-(2-(furan-2-yl)vinyl)cyclohexanecarbonitrile (3n):** The title compound was

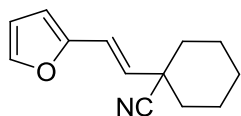

prepared according to the general procedure and purified by flash column chromatography to give a white solid, 31.2 mg, 31% yield.

$^1\text{H}$  NMR (400 MHz,  $\text{CDCl}_3$ )  $\delta$  7.35 (d,  $J = 1.2$  Hz, 1H), 6.58 (d,  $J = 15.6$  Hz, 1H), 6.37-6.39 (m, 1H), 6.28 (d,  $J = 3.2$  Hz, 1H), 5.96 (d,  $J = 16.0$  Hz, 1H), 1.98 (d,  $J = 12.4$  Hz, 2H), 1.63-1.80 (m, 5H), 1.46-1.53 (m, 2H), 1.17-1.29 (m, 1H);  $^{13}\text{C}$  NMR (100 MHz,  $\text{CDCl}_3$ )  $\delta$ . 151.5, 142.3, 128.7, 121.9, 118.6, 111.5, 109.1, 41.6, 36.4, 24.9, 22.9; HRMS (EI) calcd. for  $\text{C}_{13}\text{H}_{15}\text{NO}$  [M]: 201.1154, found: 201.1153.

**(E)-1-(3-oxo-3-phenylprop-1-enyl)cyclohexanecarbonitrile (3o):** The title compound

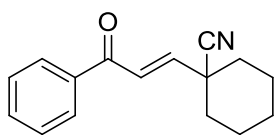

was prepared according to the general procedure and purified by flash column chromatography to give a white solid, 53.6 mg, 45% yield.

$^1\text{H}$  NMR (400 MHz,  $\text{CDCl}_3$ )  $\delta$  7.98-8.00 (m, 2H), 7.58-7.63 (m, 1H), 7.48-7.52 (m, 2H), 7.34 (d,  $J = 15.2$  Hz, 1H), 6.80 (d,  $J = 15.2$  Hz, 1H), 2.00 (d,  $J = 12.4$  Hz, 2H), 1.67-1.86 (m, 5H), 1.55-1.63 (m, 2H), 1.26-1.32 (m, 1H);  $^{13}\text{C}$  NMR (100 MHz,  $\text{CDCl}_3$ )  $\delta$  189.4, 146.6, 137.2, 133.4, 128.8, 128.7, 124.8, 121.0, 42.3, 35.6, 24.7, 22.5; HRMS (ESI) calcd. for  $\text{C}_{16}\text{H}_{17}\text{NONa}$  [M+Na]: 262.1202, found: 262.1205.

**(E)-1-(3-oxo-3-*p*-tolylprop-1-enyl)cyclohexanecarbonitrile (3p):** The title compound

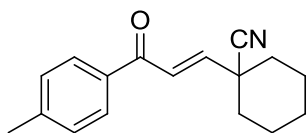

was prepared according to the general procedure and purified by flash column chromatography to give a white solid, 60.8 mg, 48% yield.

$^1\text{H}$  NMR (400 MHz,  $\text{CDCl}_3$ )  $\delta$  7.89 (d,  $J = 8.4$  Hz, 2H), 7.33 (d,  $J = 15.6$  Hz, 1H), 7.29 (d,  $J = 8.0$  Hz, 2H), 6.78 (d,  $J = 15.6$  Hz, 1H), 2.43 (s, 3H), 1.99 (d,  $J = 12.4$  Hz, 2H), 1.67-1.86 (m, 5H), 1.55-1.62 (m, 2H), 1.25-1.30 (m, 1H);  $^{13}\text{C}$  NMR (100 MHz,  $\text{CDCl}_3$ )  $\delta$  188.9, 146.2, 144.4, 134.7, 129.5, 128.8, 124.8, 121.1, 42.2, 35.6, 24.7, 22.5, 21.7; HRMS (ESI) calcd. for  $\text{C}_{17}\text{H}_{19}\text{NONa}$  [M+Na]: 276.1359, found: 276.1364.

**(E)-1-(3-(2,5-dimethylphenyl)-3-oxoprop-1-enyl)cyclohexanecarbonitrile (3q):** The

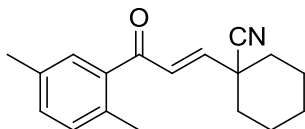

title compound was prepared according to the general procedure and purified by flash column chromatography to give a white

solid, 58.4 mg, 44% yield.  $^1\text{H}$  NMR (400 MHz,  $\text{CDCl}_3$ )  $\delta$  7.32 (s, 1H), 7.19 (d,  $J = 7.6$  Hz, 1H), 7.13 (d,  $J = 8.0$  Hz, 1H), 6.96 (d,  $J = 15.6$  Hz, 1H), 6.58 (d,  $J = 15.6$  Hz, 1H), 2.40 (s, 3H), 2.36 (s, 3H), 1.99 (d,  $J = 12.4$  Hz, 2H), 1.66-1.84 (m, 5H), 1.51-1.58 (m, 2H), 1.23-1.29 (m, 1H);  $^{13}\text{C}$  NMR (100 MHz,  $\text{CDCl}_3$ )  $\delta$  194.4, 146.7, 137.9, 135.3, 134.6, 132.1, 131.6, 129.1, 128.9, 120.9, 41.9, 35.5, 24.7, 22.5, 20.9, 20.2; HRMS (ESI) calcd. for  $\text{C}_{18}\text{H}_{21}\text{NONa}$   $[\text{M}+\text{Na}]$ : 290.1515, found: 290.1517.

**(E)-1-(3-(4-chlorophenyl)-3-oxoprop-1-enyl)cyclohexanecarbonitrile (3r):** The title

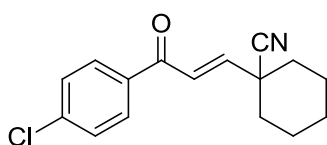

compound was prepared according to the general procedure and purified by flash column chromatography to give a white

solid, 49 mg, 36% yield.  $^1\text{H}$  NMR (400 MHz,  $\text{CDCl}_3$ )  $\delta$  7.92-7.96 (m, 2H), 7.47-7.49 (m, 2H), 7.29 (d,  $J = 15.6$  Hz, 1H), 6.81 (d,  $J = 15.2$  Hz, 1H), 1.99 (d,  $J = 12.4$  Hz, 2H), 1.68-1.87 (m, 5H), 1.55-1.62 (m, 2H), 1.26-1.31 (m, 1H);  $^{13}\text{C}$  NMR (100 MHz,  $\text{CDCl}_3$ )  $\delta$  188.1, 147.2, 139.9, 135.5, 130.1, 129.1, 124.3, 120.9, 42.3, 35.5, 24.6, 22.5; HRMS (ESI) calcd. for  $\text{C}_{16}\text{H}_{16}\text{ClN}$   $[\text{M}+\text{Na}]$ : 296.0813, found: 296.0799.

**(E)-2,2-dimethyl-4-phenylbut-3-enenitrile (4a):** The title compound was prepared

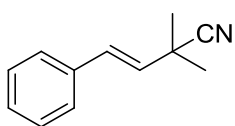

according to the general procedure and purified by flash column chromatography to give a white solid, 8 mg, 9% yield. NMR:  $^1\text{H}$

NMR (400 MHz,  $\text{CDCl}_3$ )  $\delta$  7.38-7.40 (m, 2H), 7.32-7.35 (m, 2H), 7.25-7.29 (m, 1H), 6.74 (d,  $J = 16.0$  Hz, 1H), 6.01 (d,  $J = 15.6$  Hz, 1H), 1.54 (s, 6H);  $^{13}\text{C}$  NMR (100 MHz,  $\text{CDCl}_3$ )  $\delta$  135.9, 130.5, 130.0, 128.8, 128.3, 126.7, 123.6, 35.1, 27.8; HRMS (ESI) calcd. for  $\text{C}_{12}\text{H}_{13}\text{N}$   $[\text{M}+\text{Na}]$ : 194.0940, found: 194.0935.

## References:

1. P. Zhang, H.-R. Hu, S.-H. Bian, Z.-H. Huang, Y. Chu, D.-Y. Ye, *Eur. J. Med. Chem.* **2013**, *61*, 95.
2. D. Papa, E. Schwenk, F. Villani, E. Klingsberg, *J. Am. Chem. Soc.* **1948**, *70*, 3356.
3. P. Jakubec, D. Berkeš, A. Kolarovič, F. Považanec, *Synthesis*. **2006**, 4032.

## **5. Copies for $^1\text{H}$ NMR and $^{13}\text{C}$ NMR of the products**

GB-140317-2-HNMR

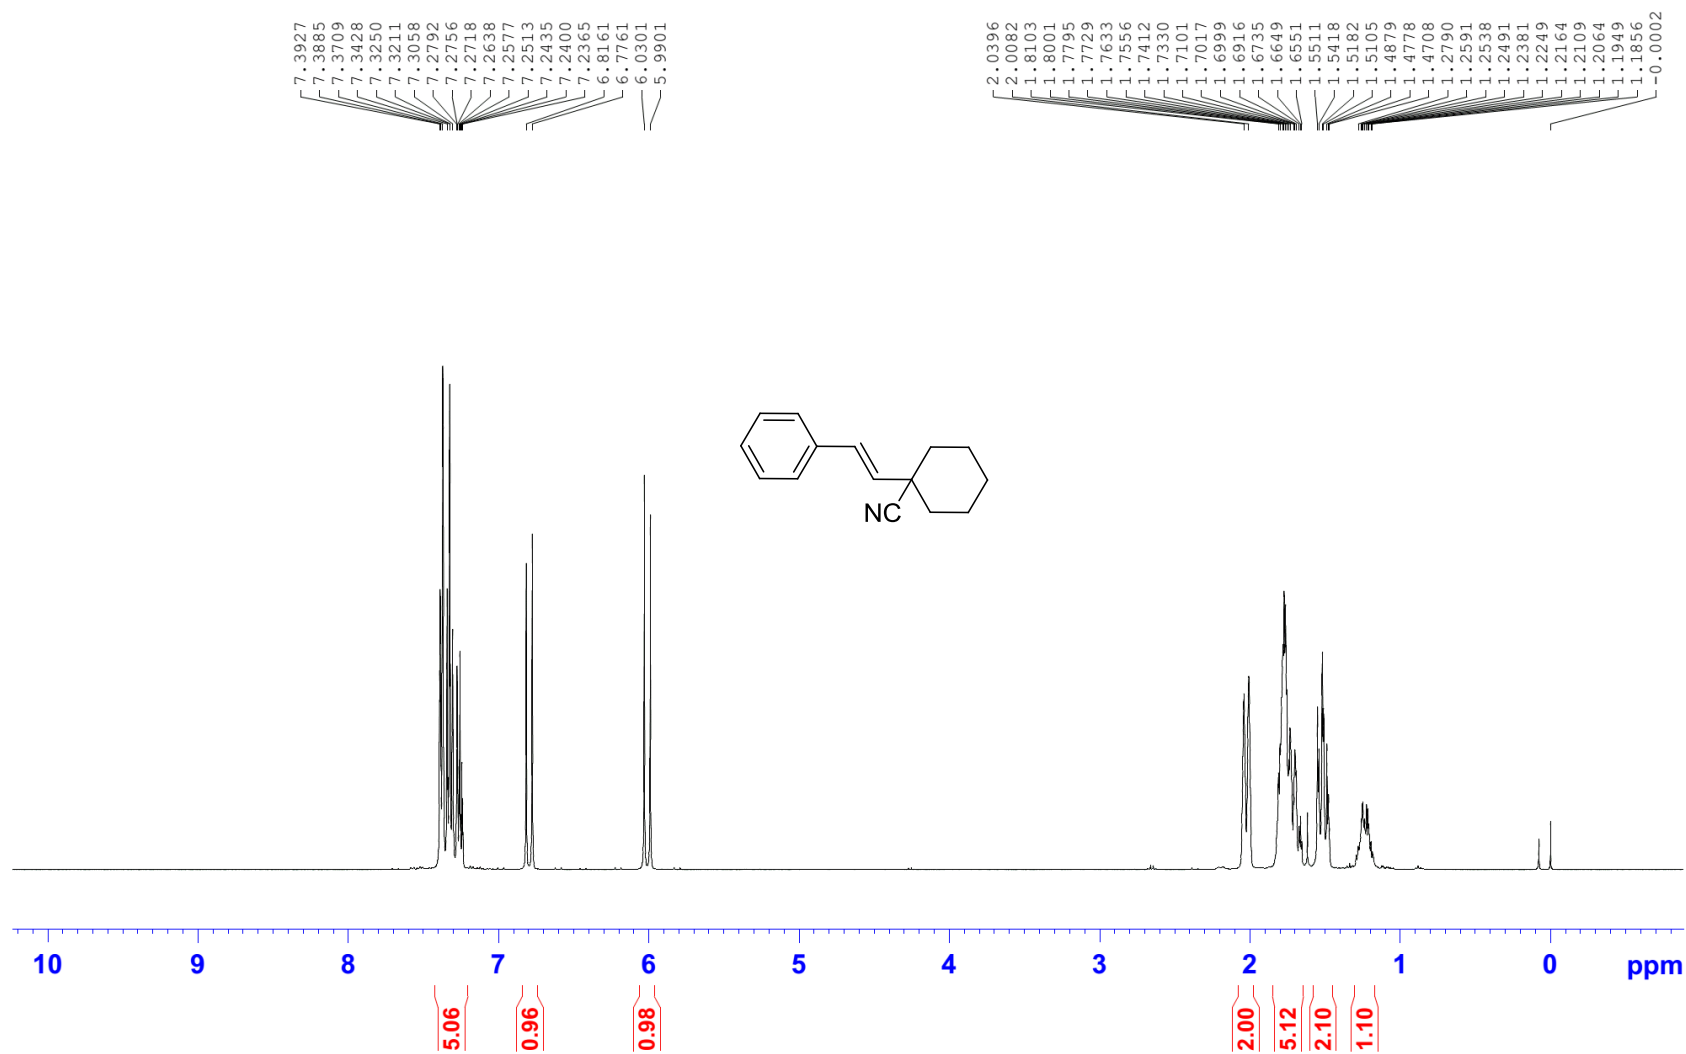

GB-140317-2-CNMR

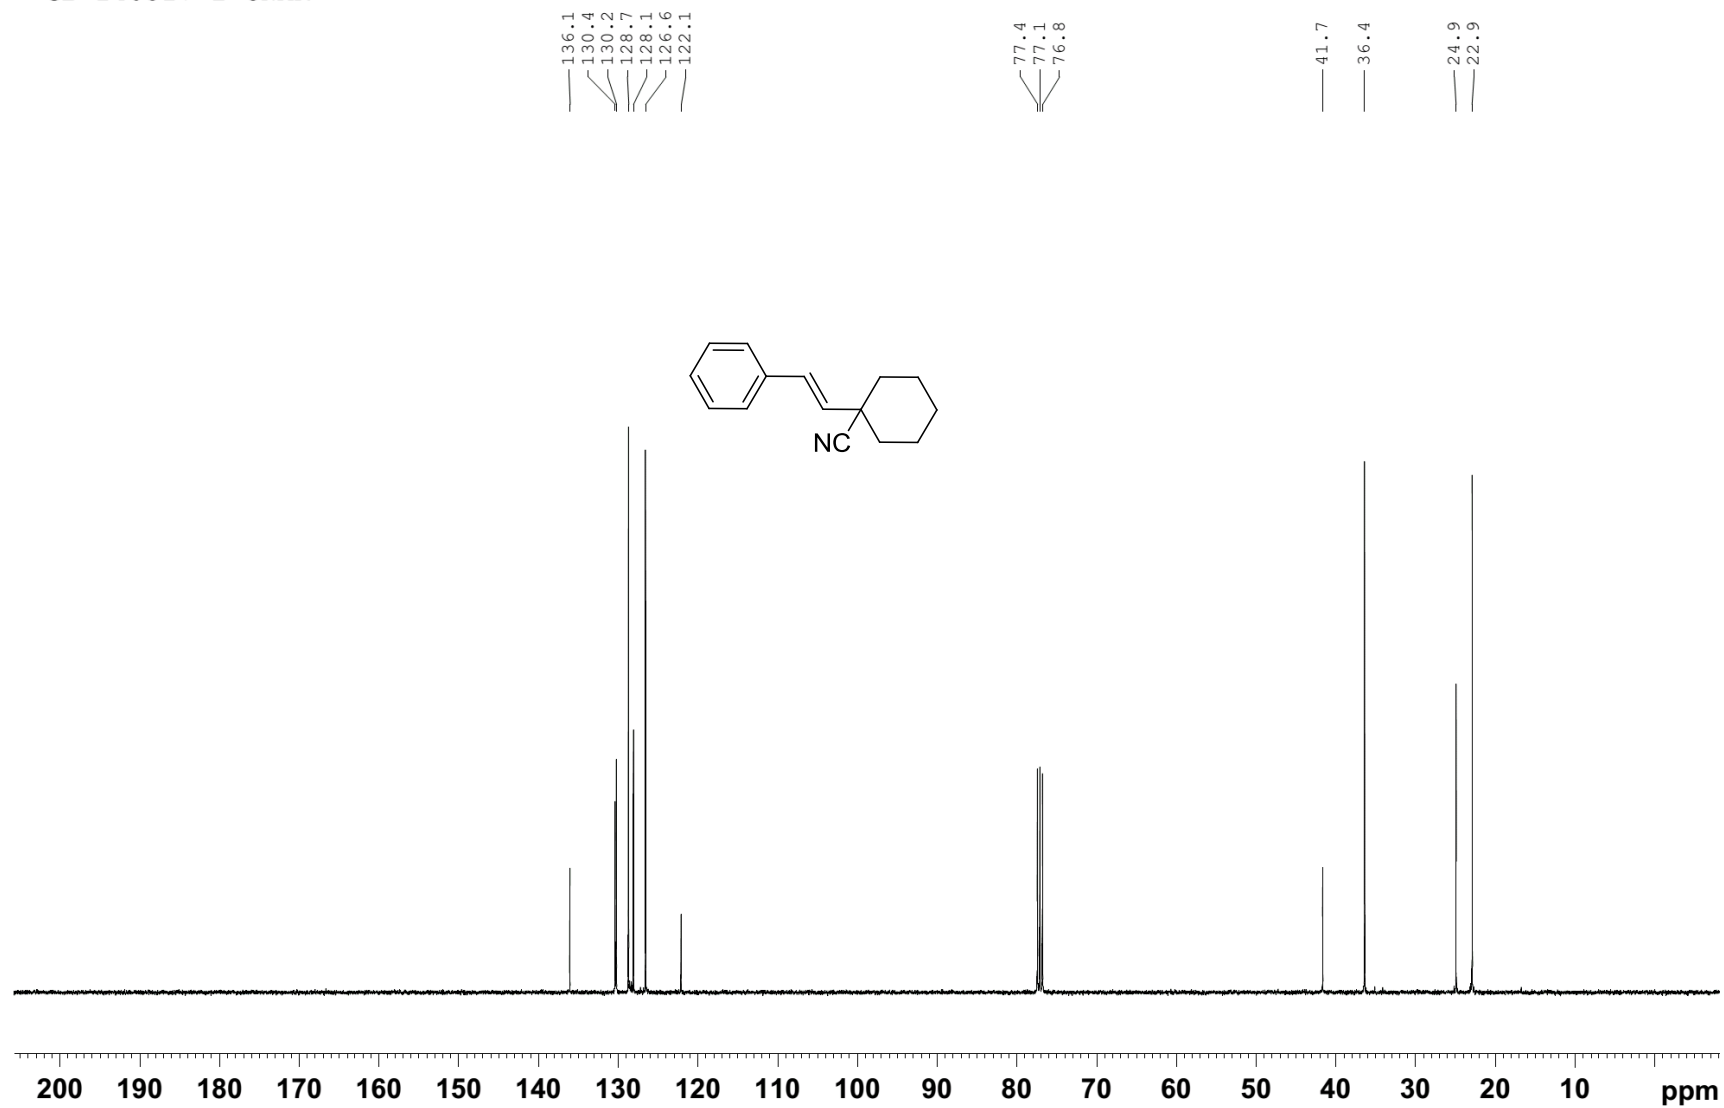

GB-140310-3-HNMR

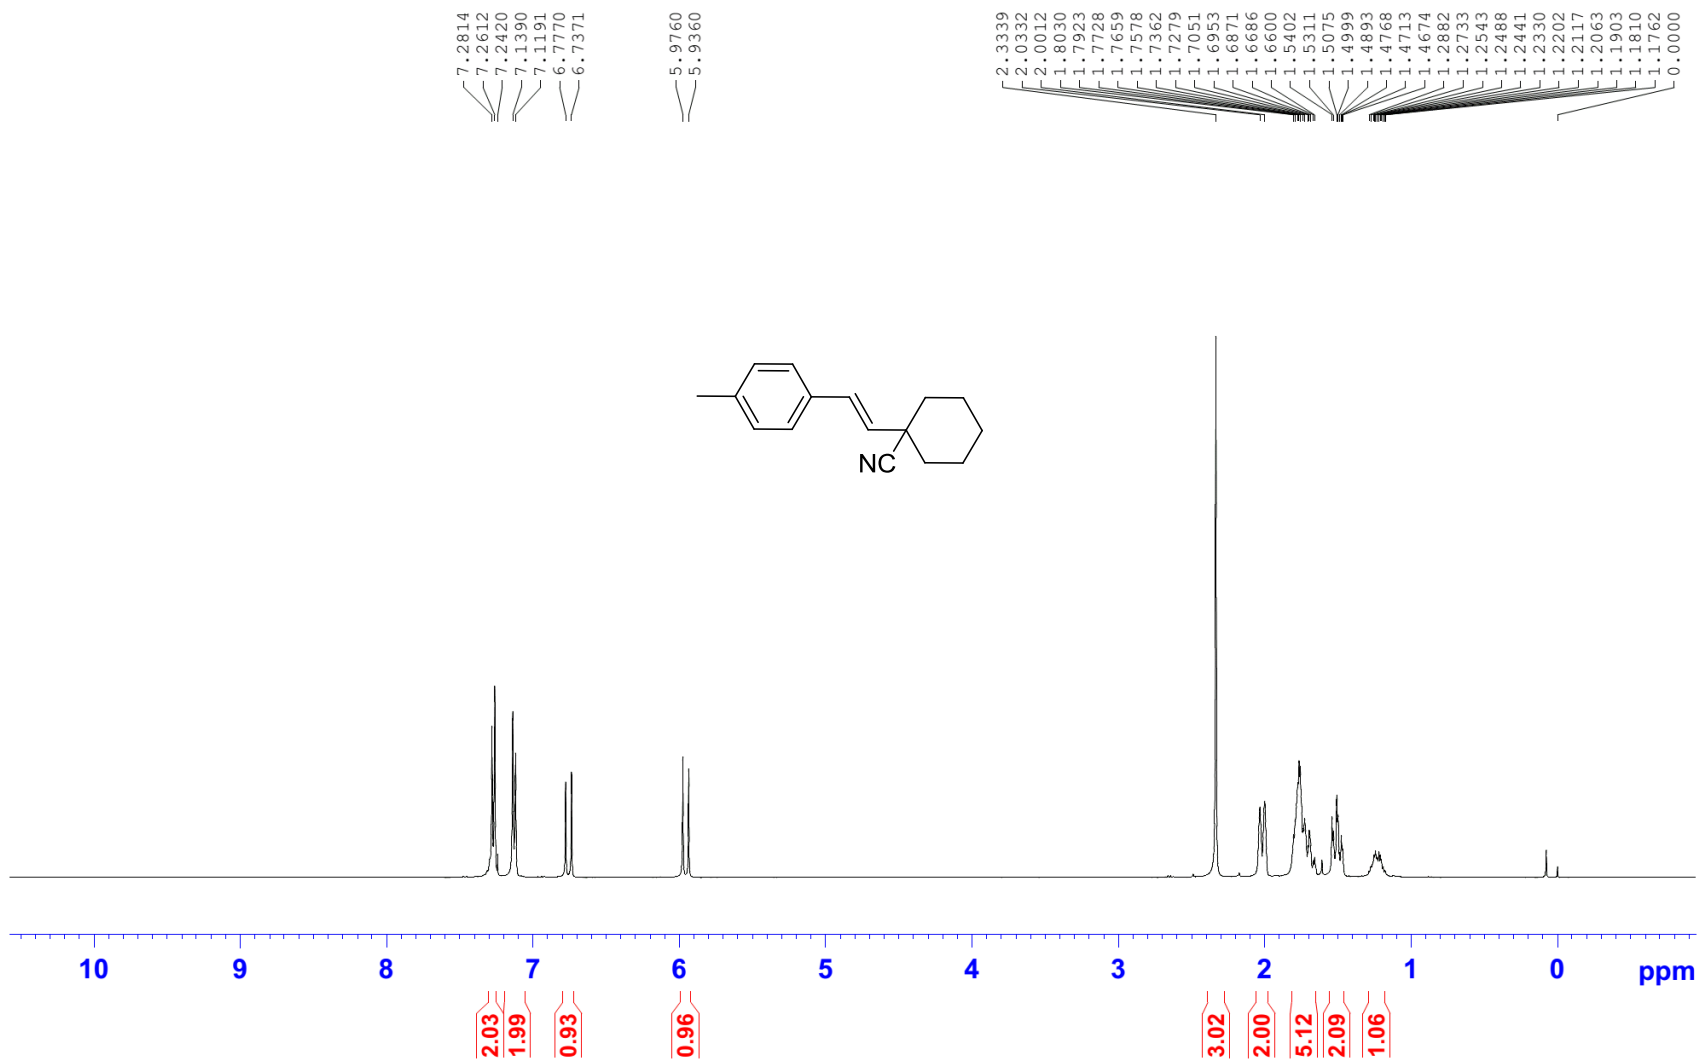



GB-140310-3-CNMR

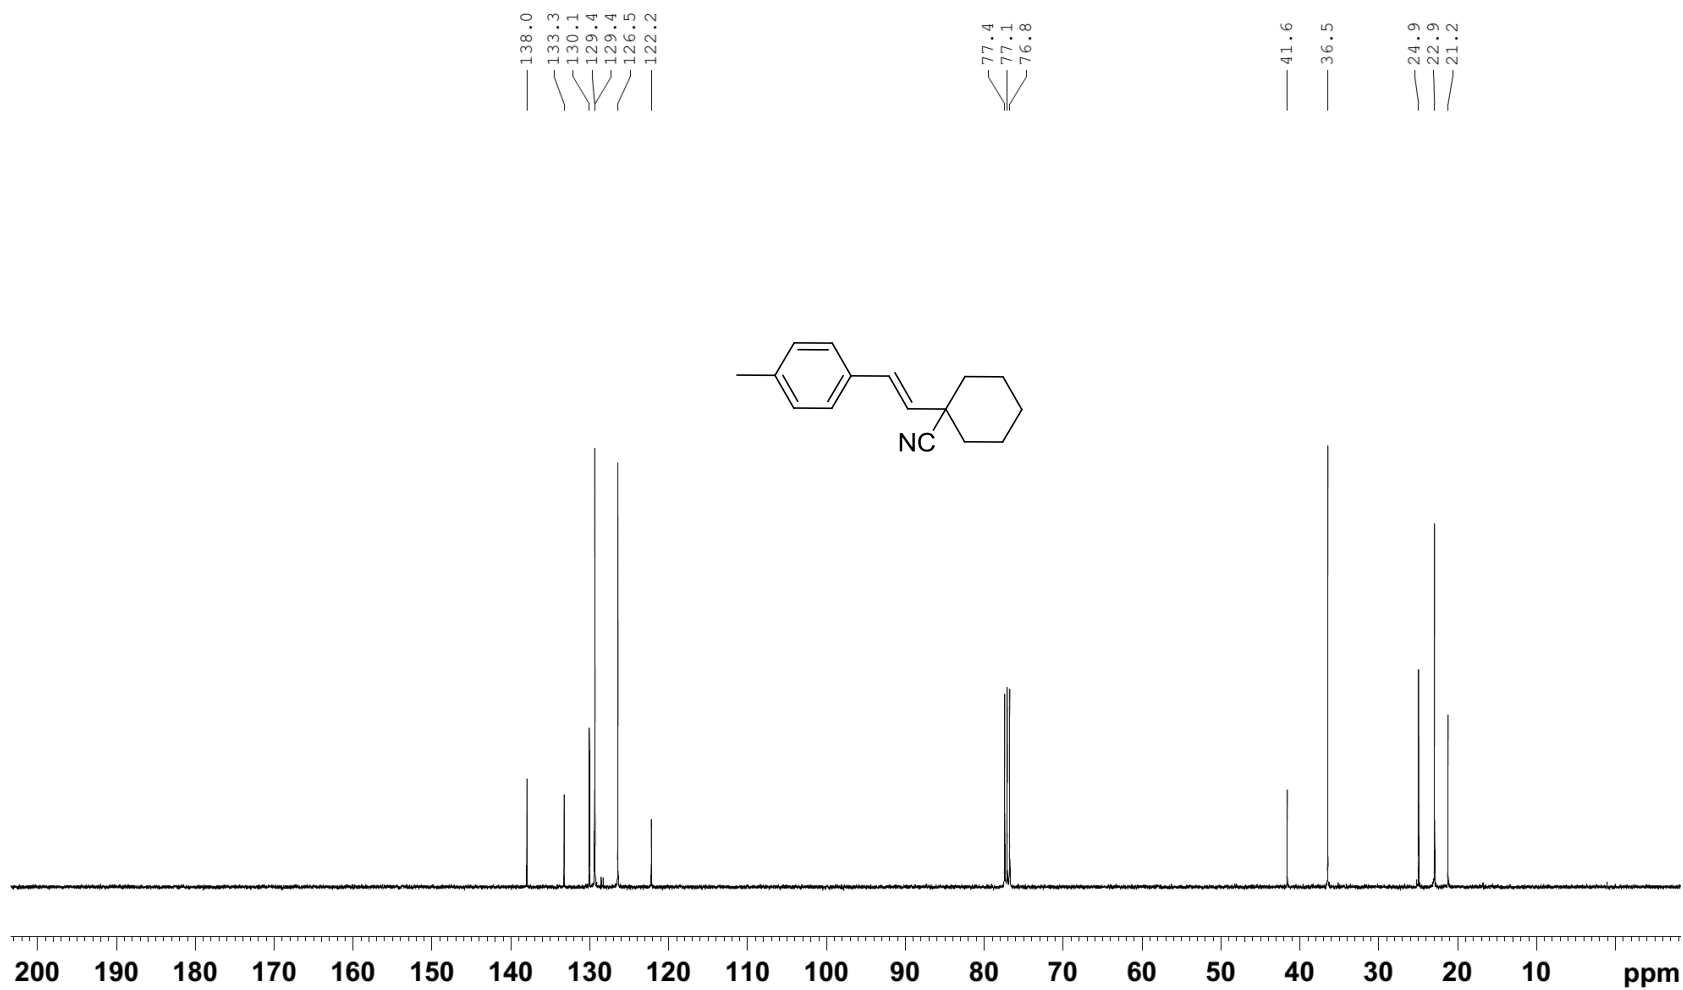

GB-140303-2-HNMR

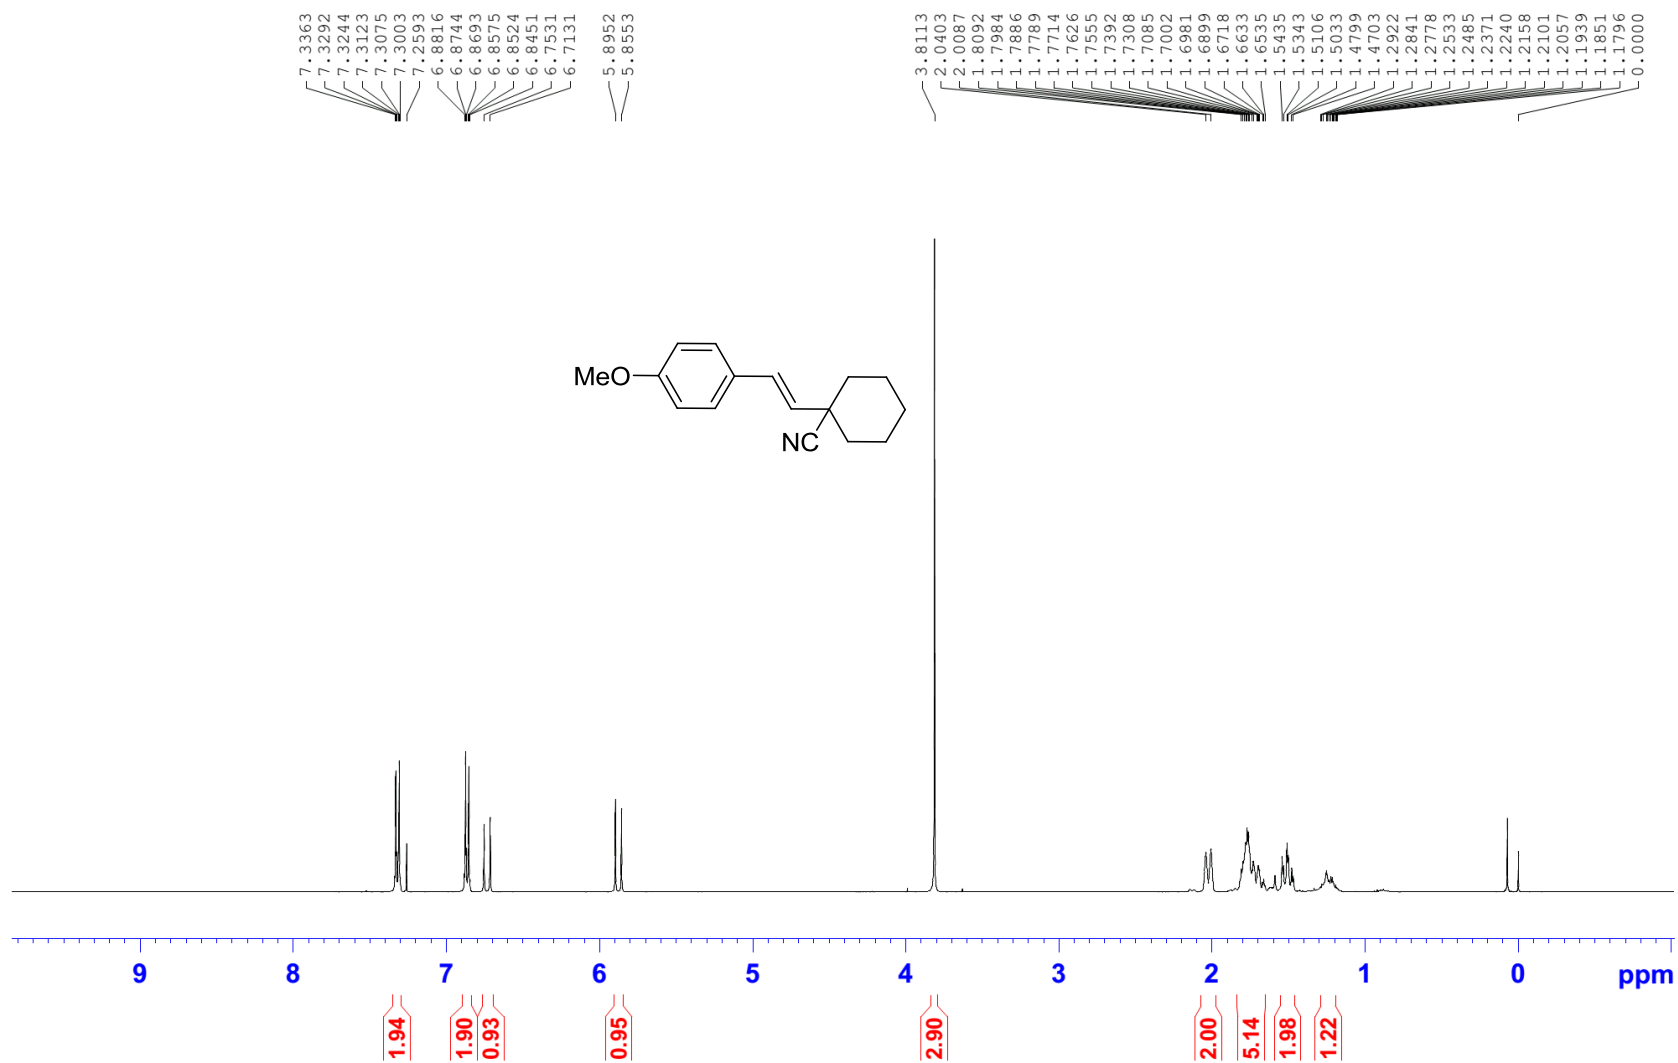

GB-140507-1-CNMR

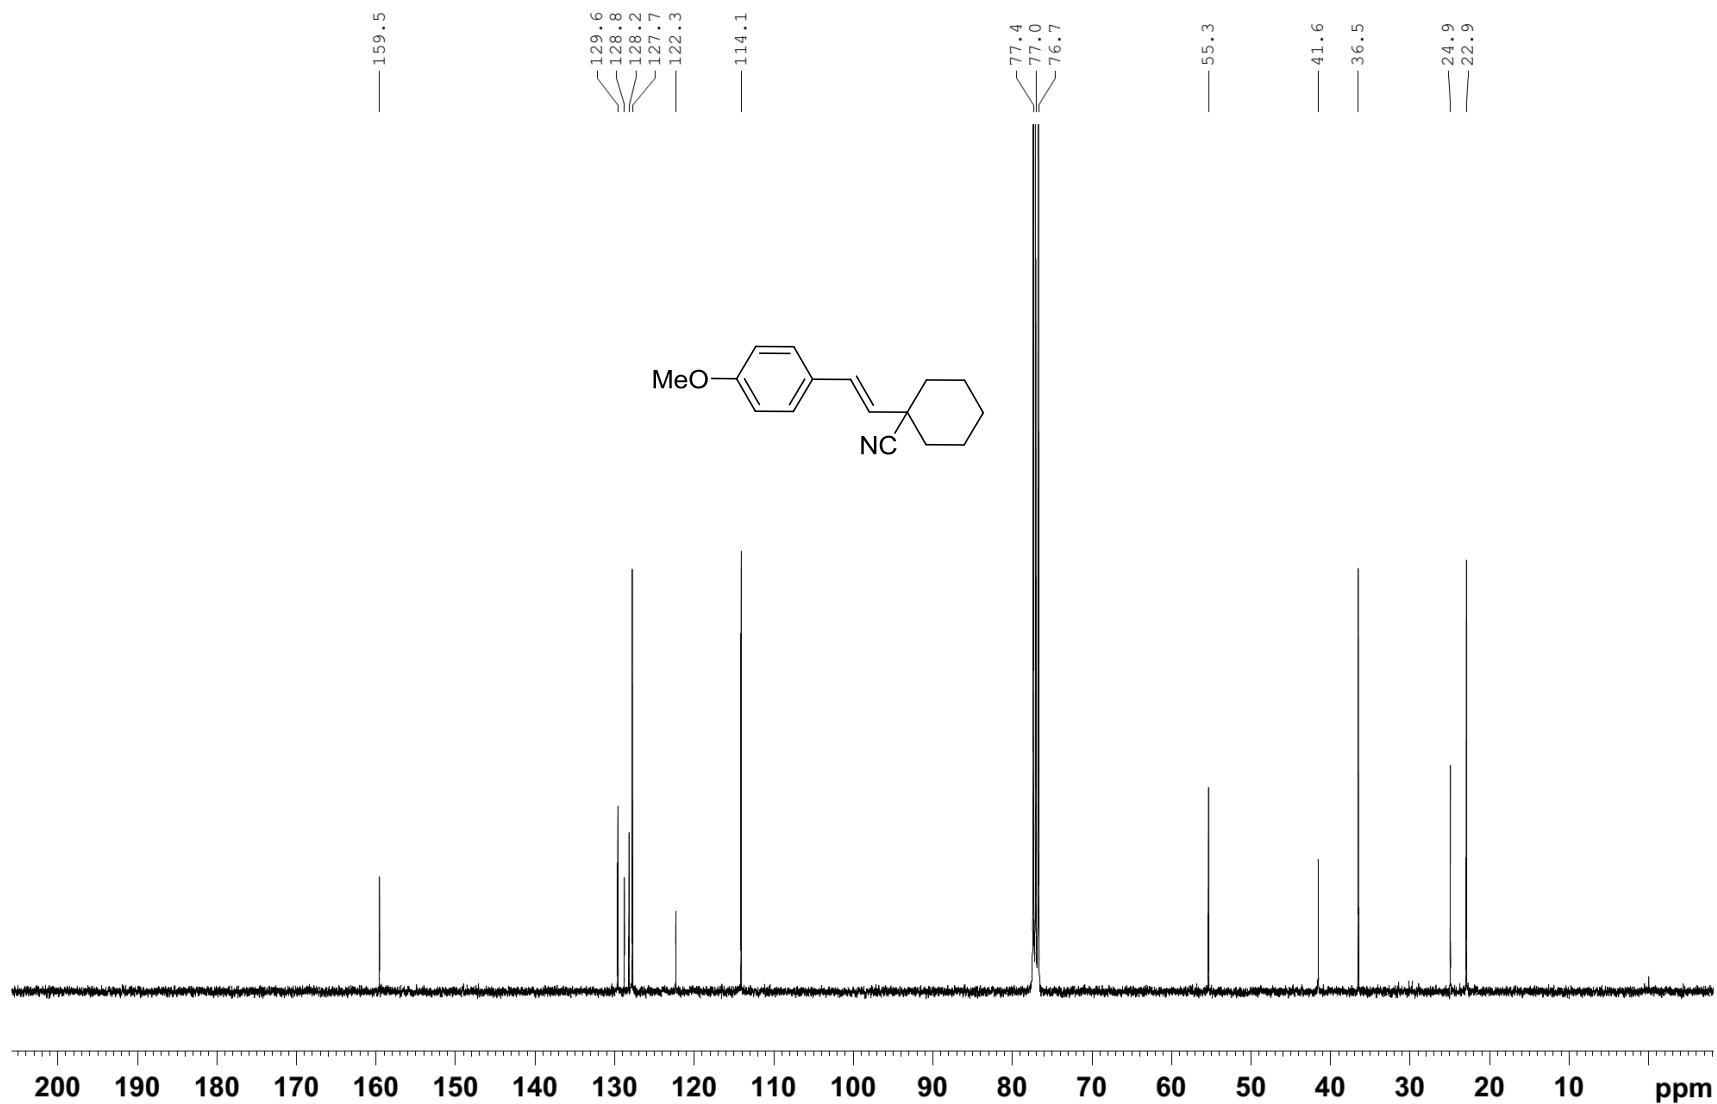

GB-140219-2-HNMR

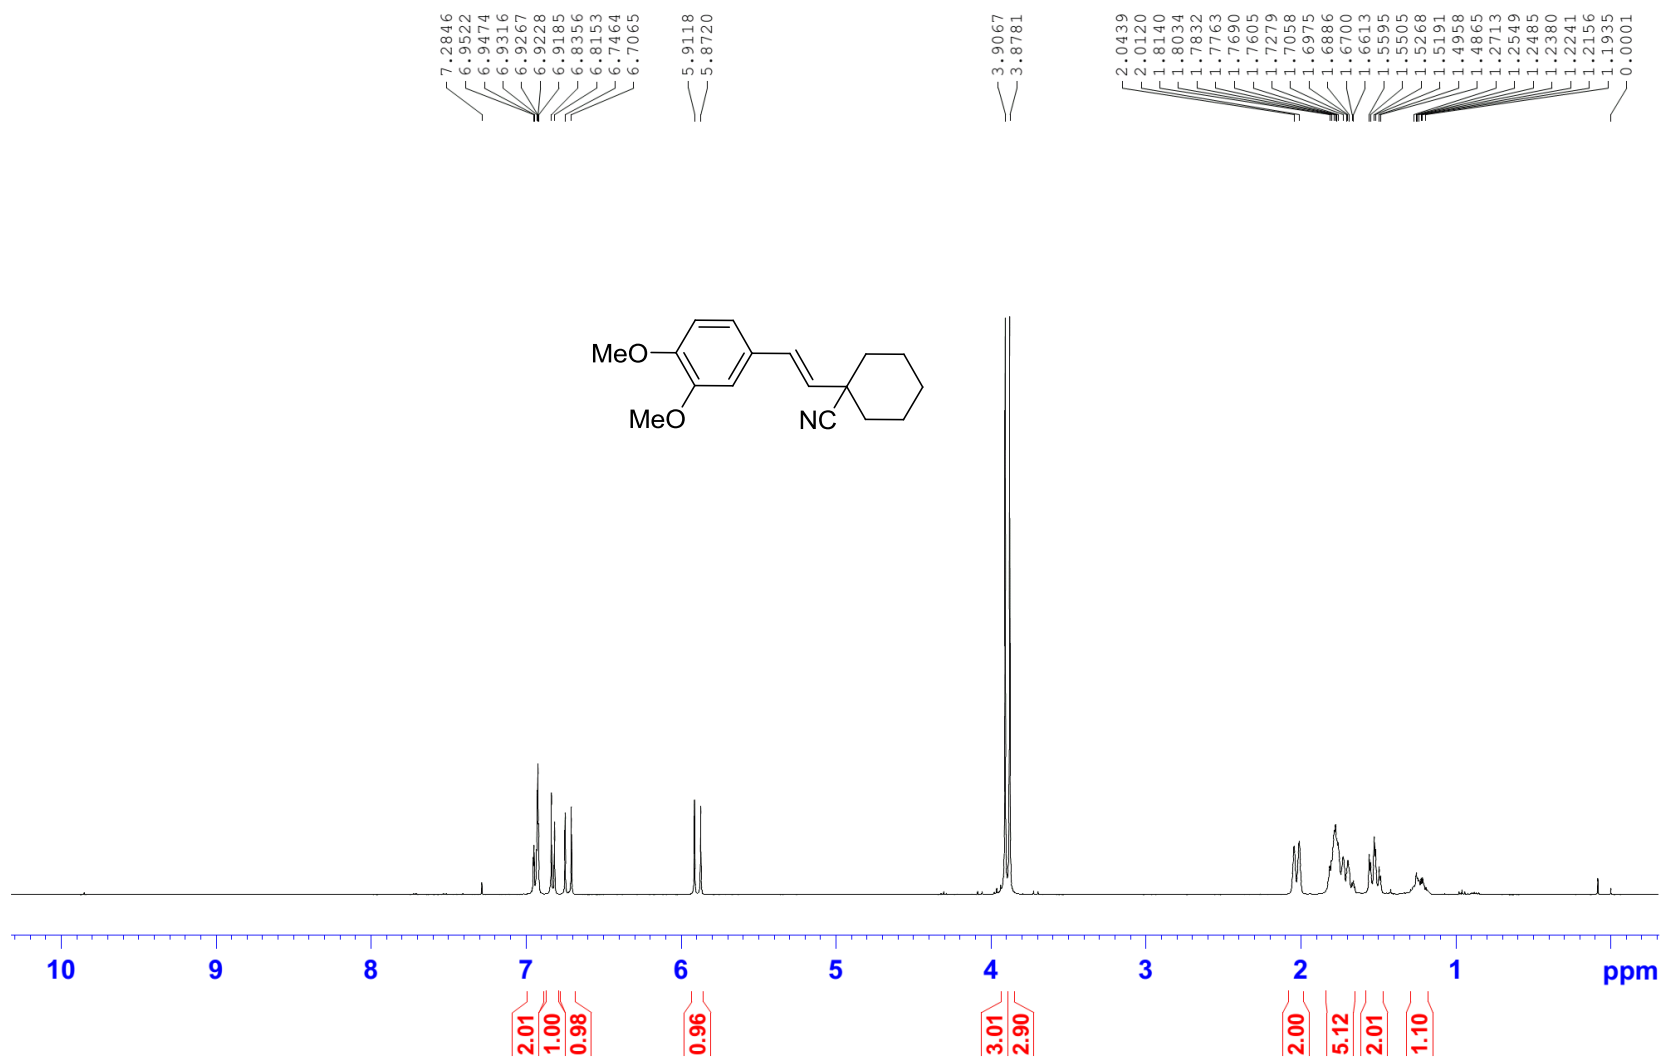

GB-140219-2-CNMR

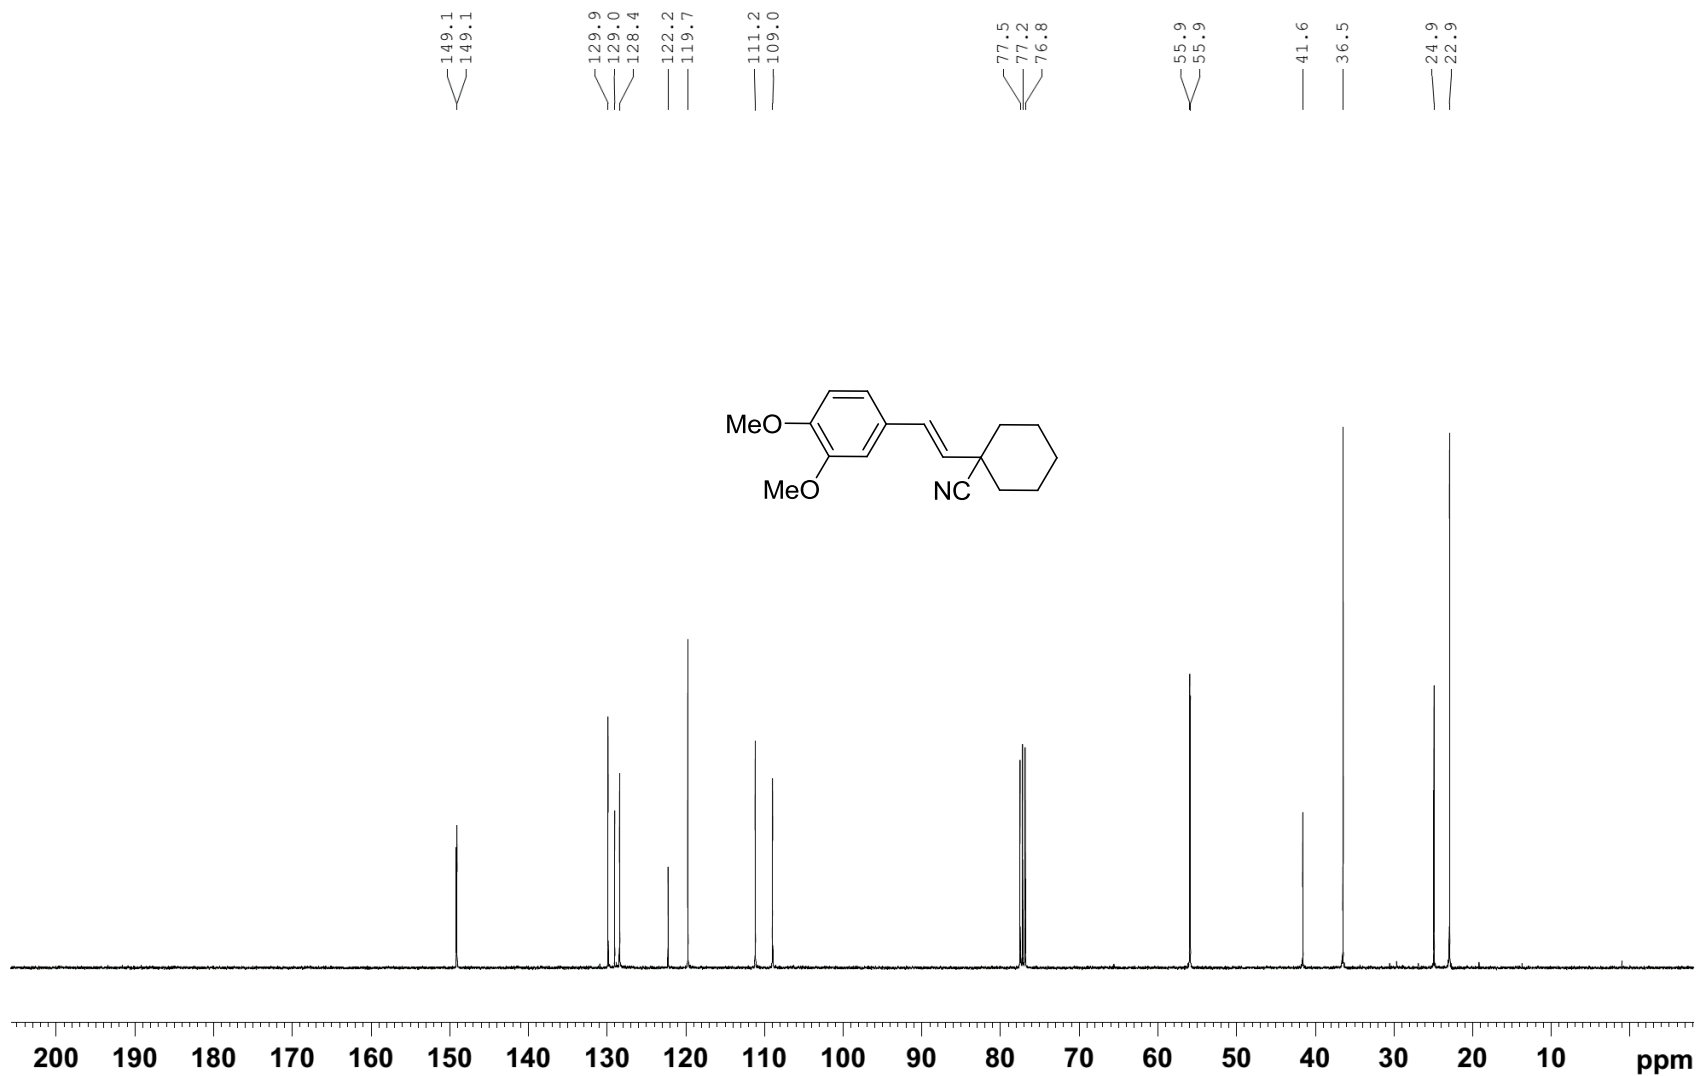

GB-140108-10-HNMR

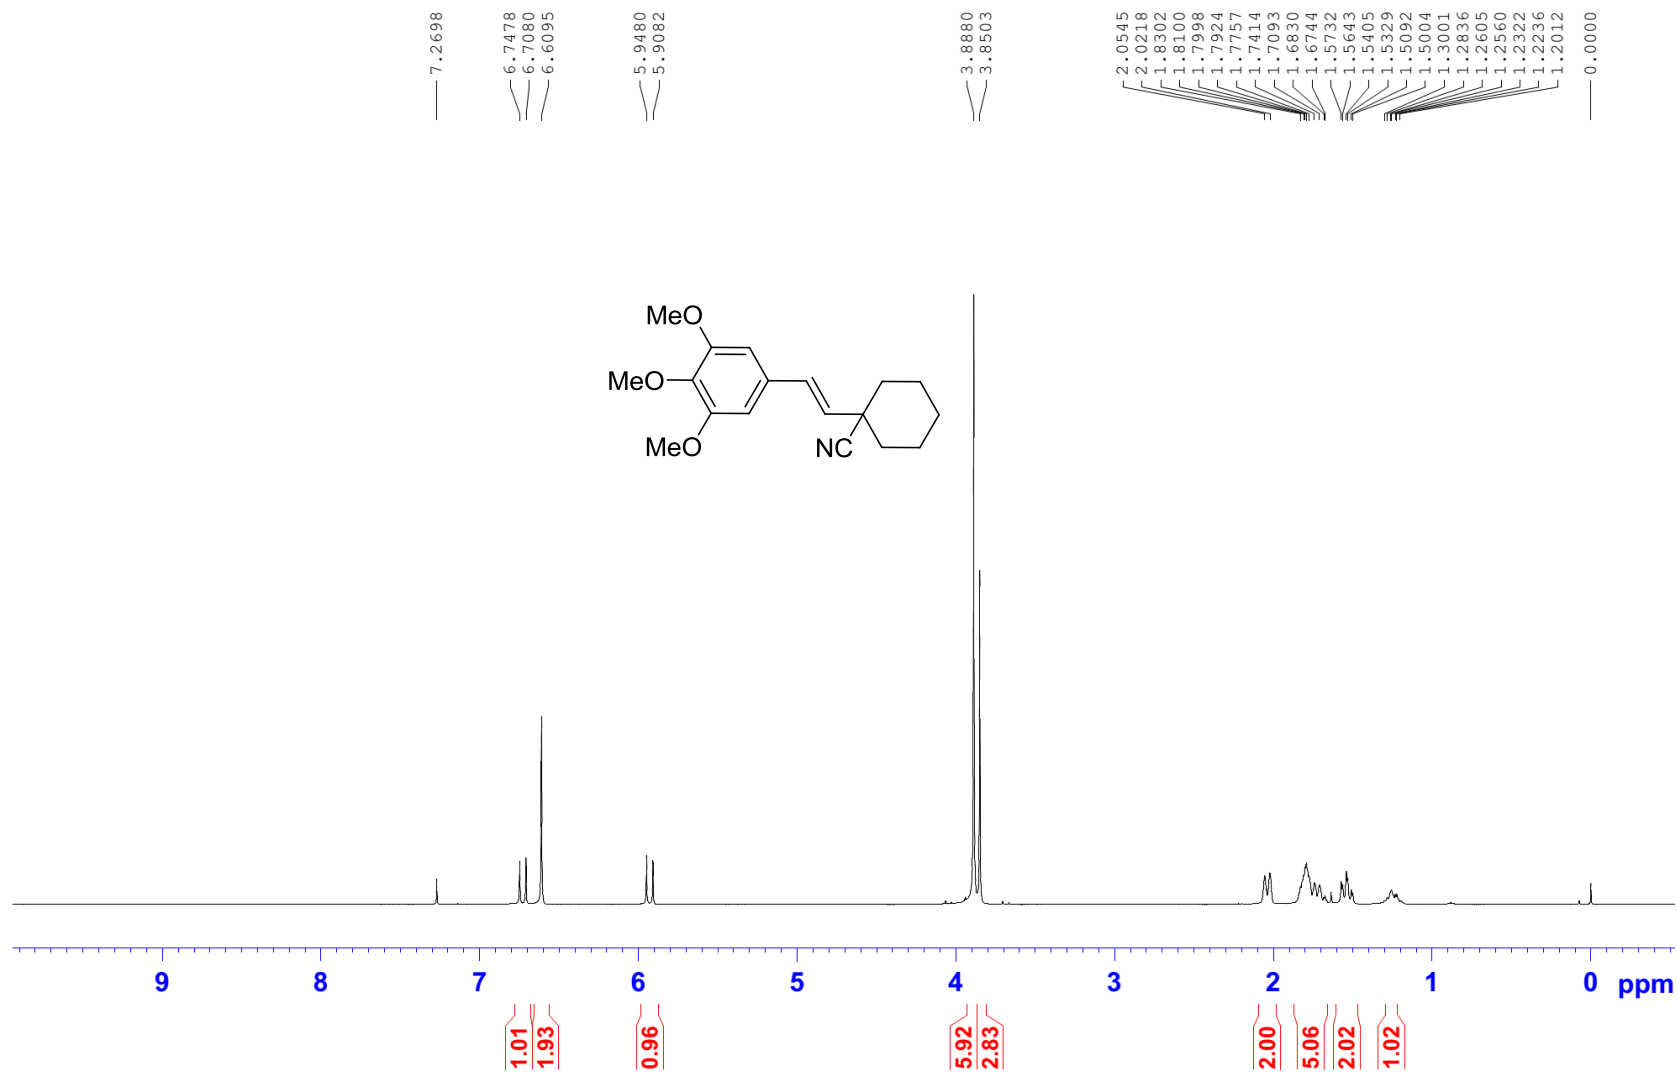

GB-140106-10-CNMR

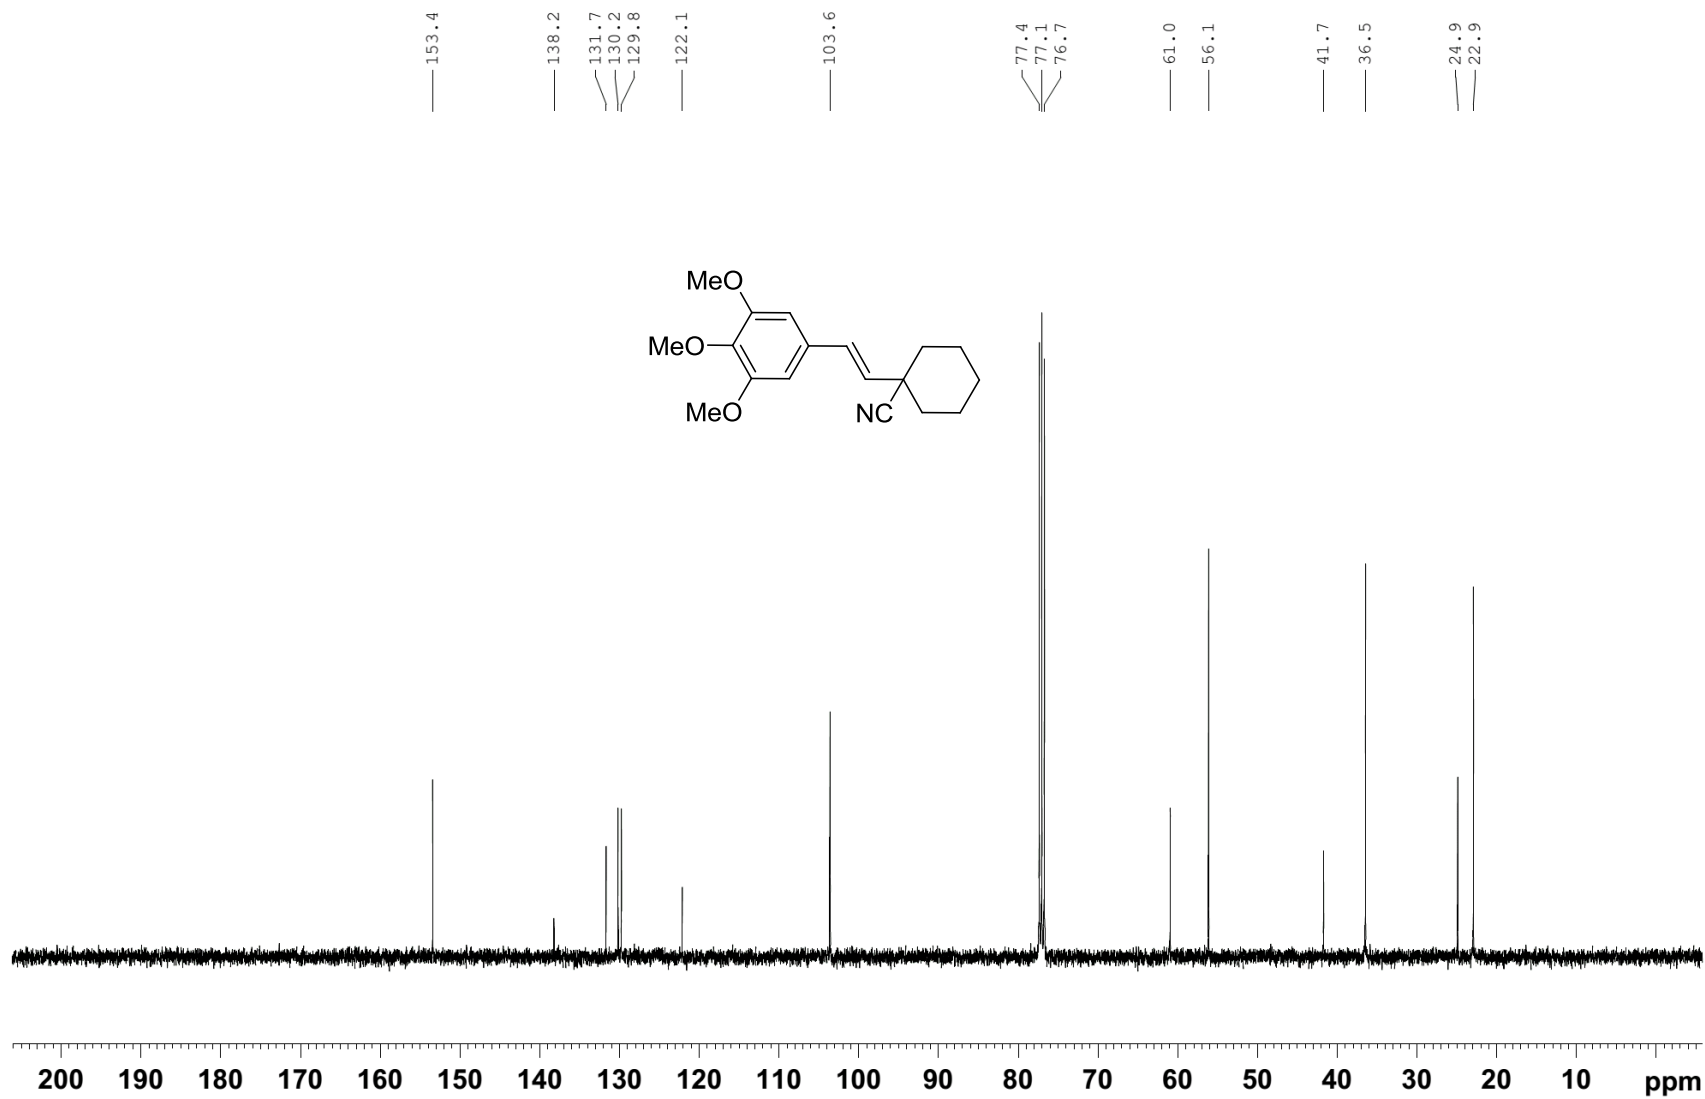

GB-140120-1-HNMR

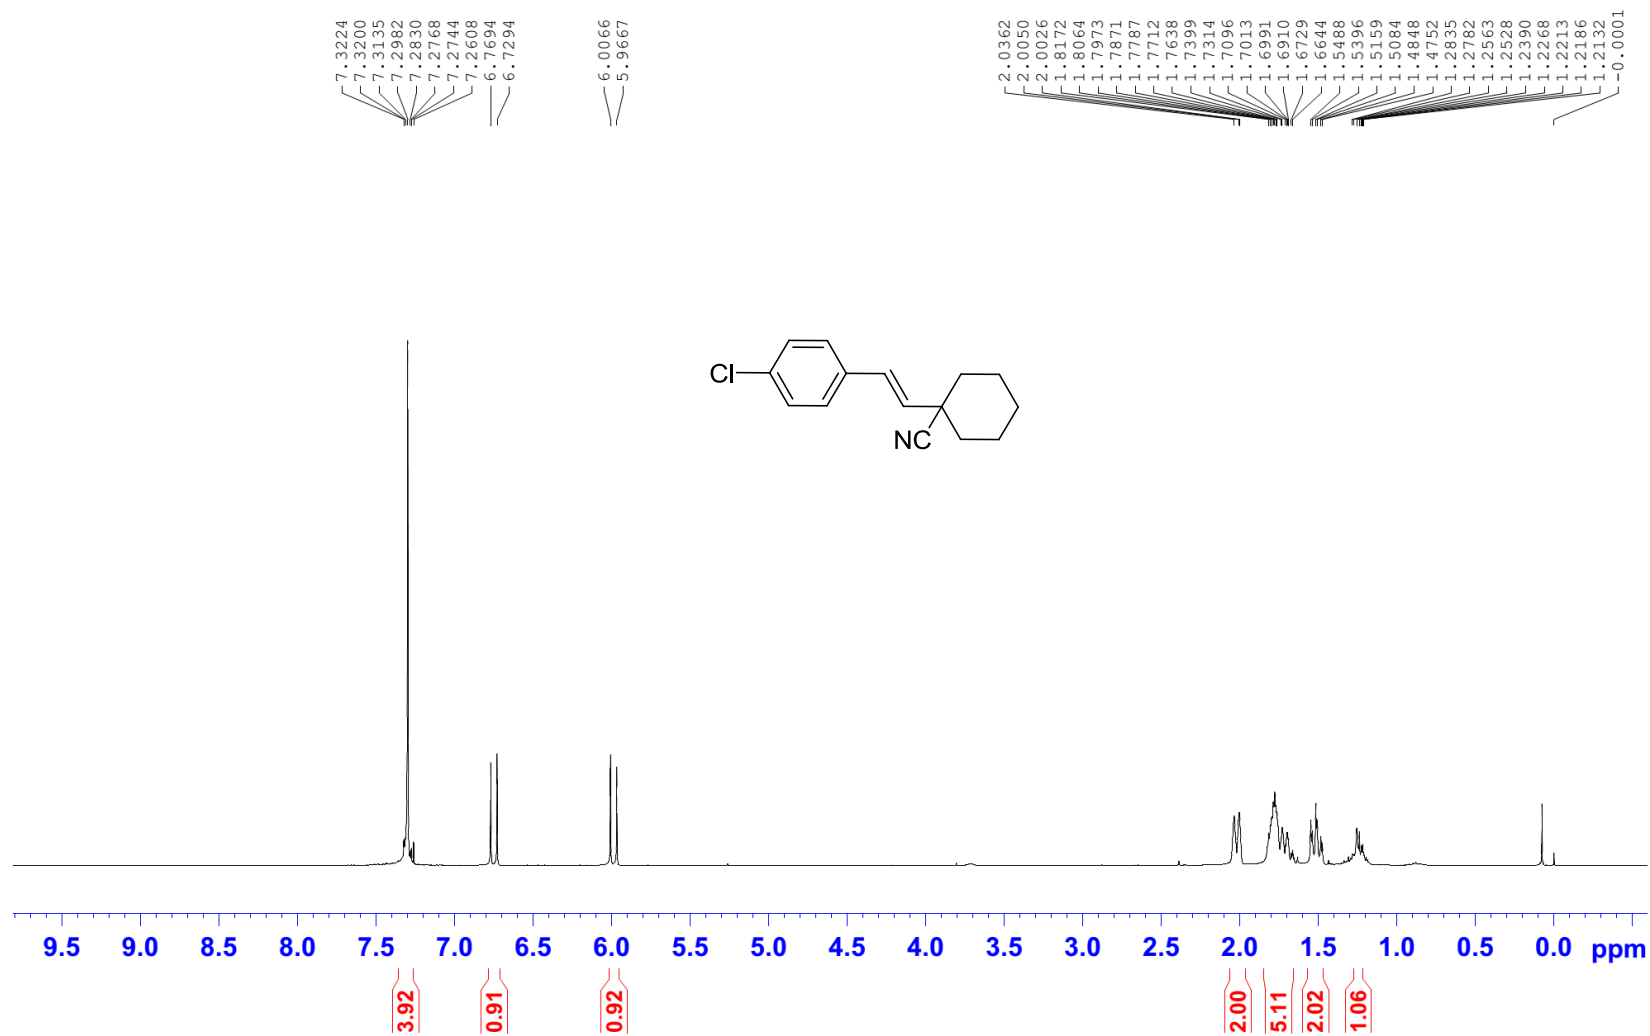



GB-140120-1-CNMR

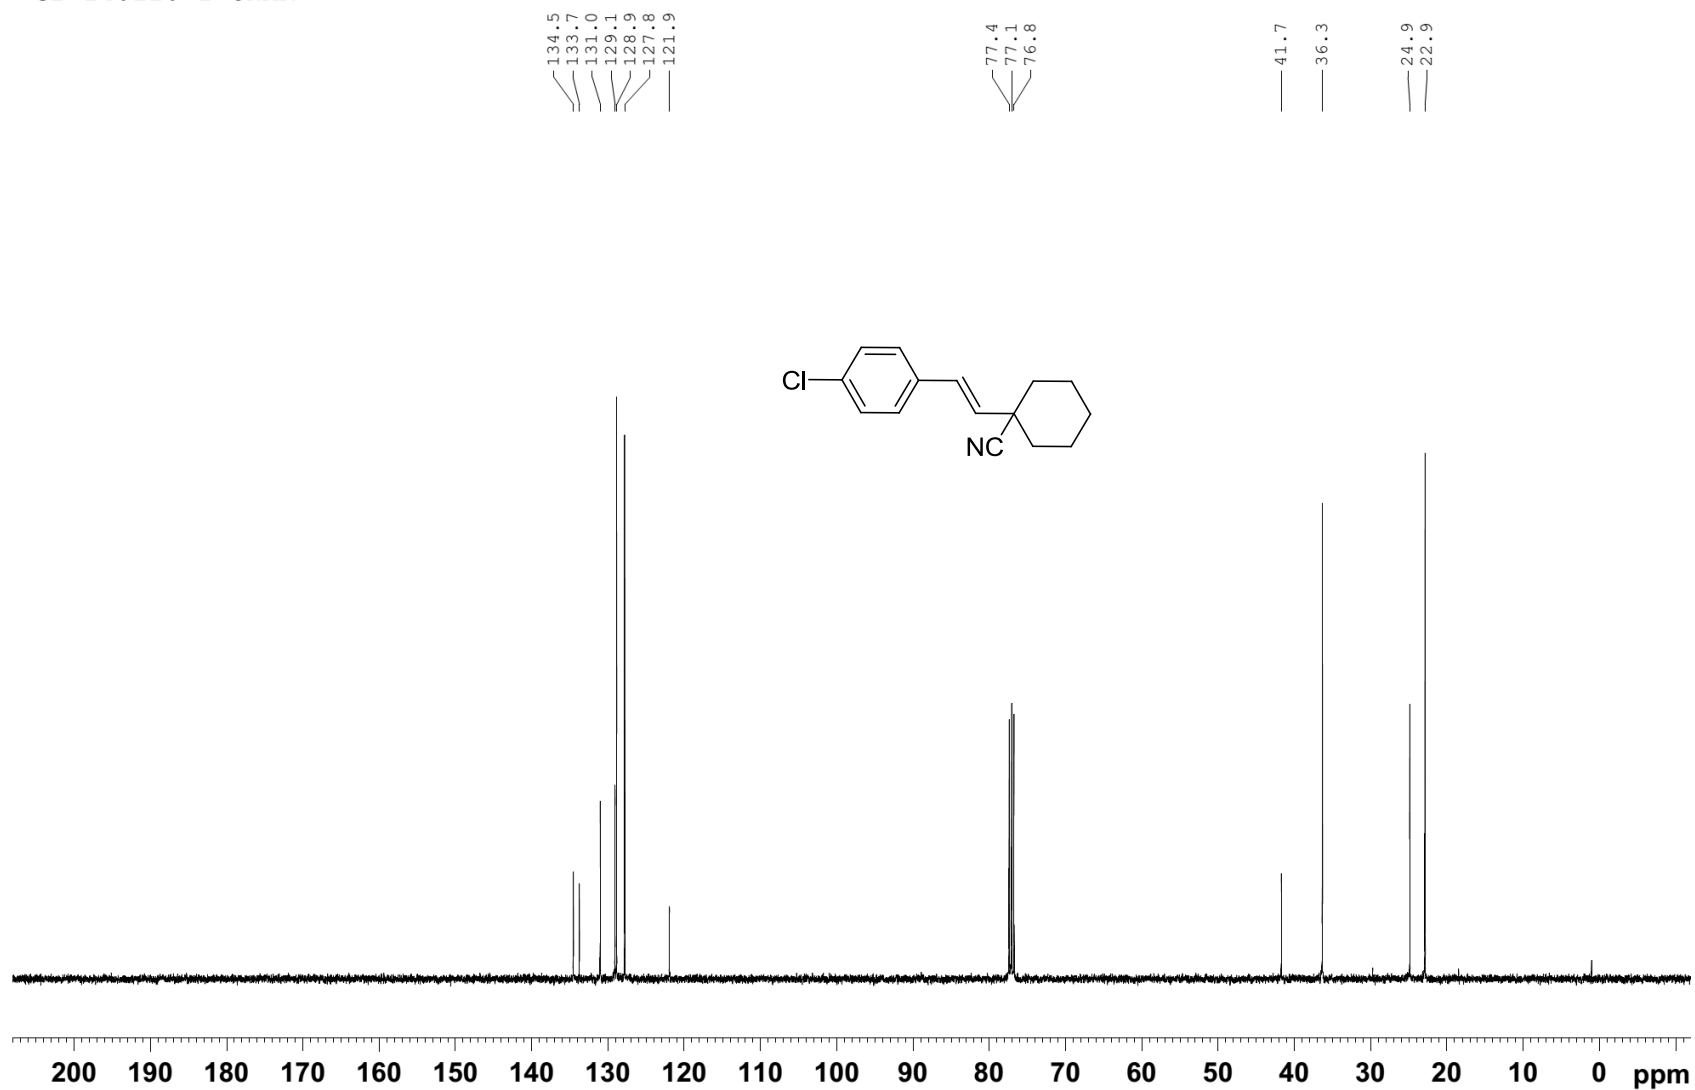

GB-140120-6-HNMR

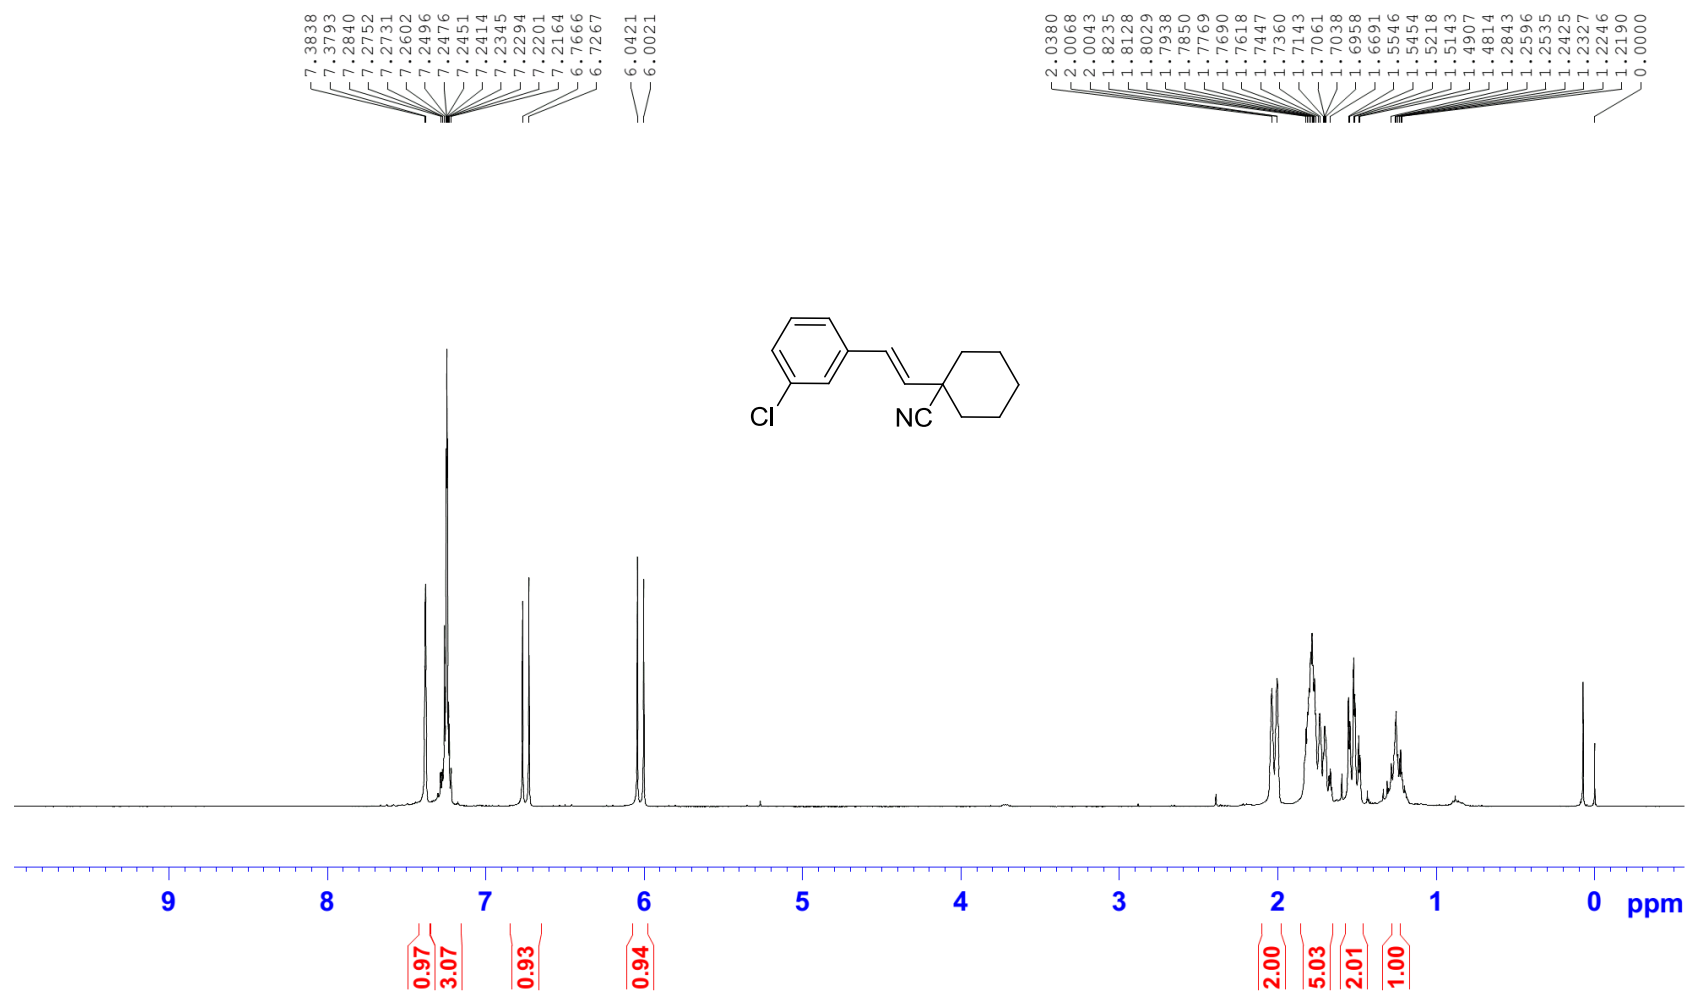

GB-140120-6-CNMR

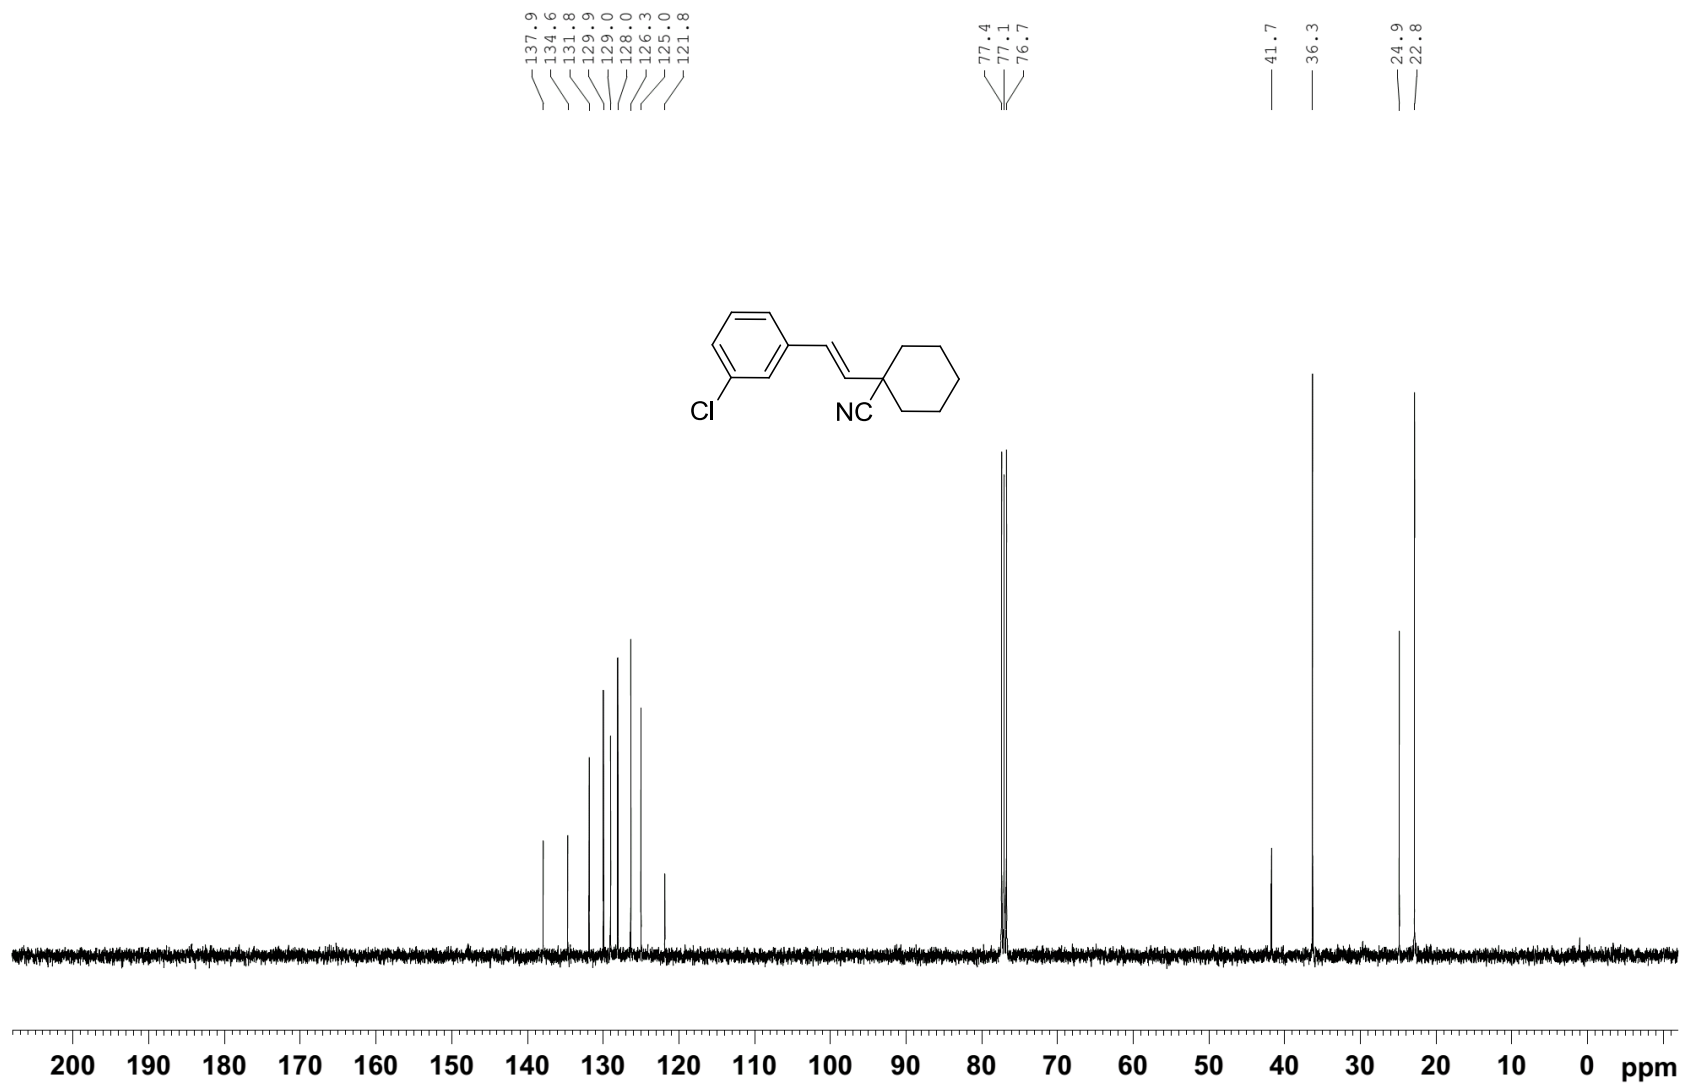

GB-140714-2-HNMR

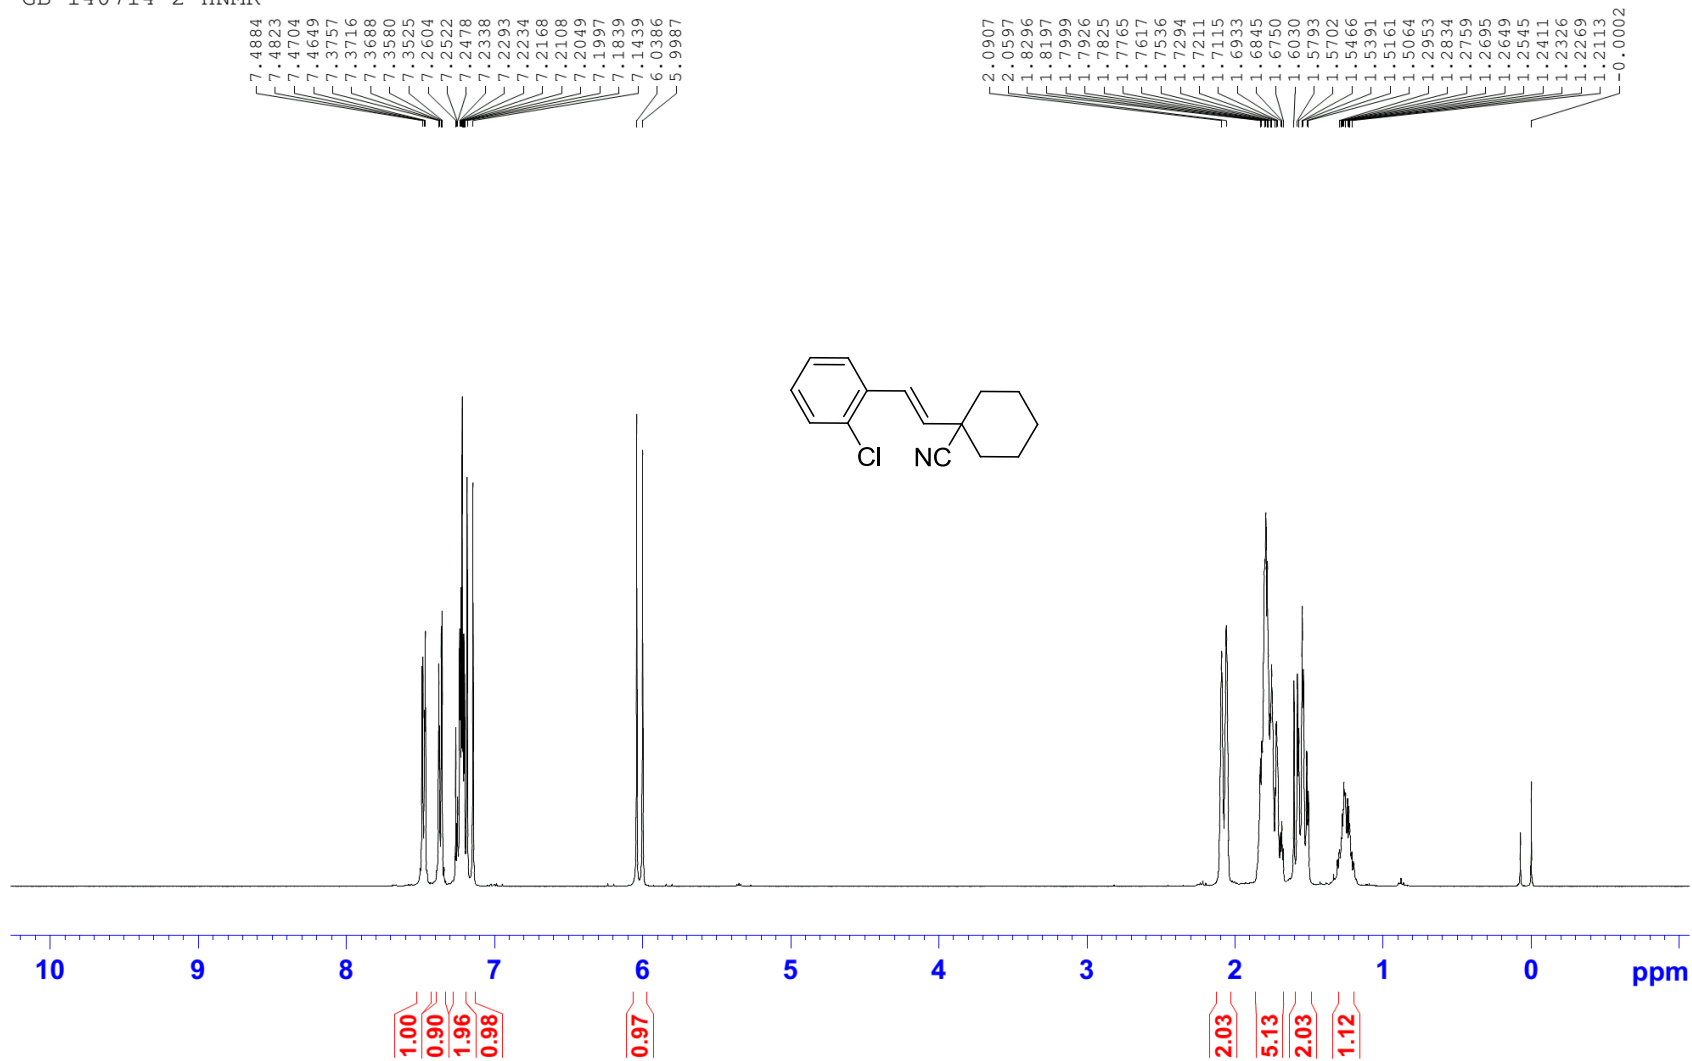

GB-140714-2-CNMR

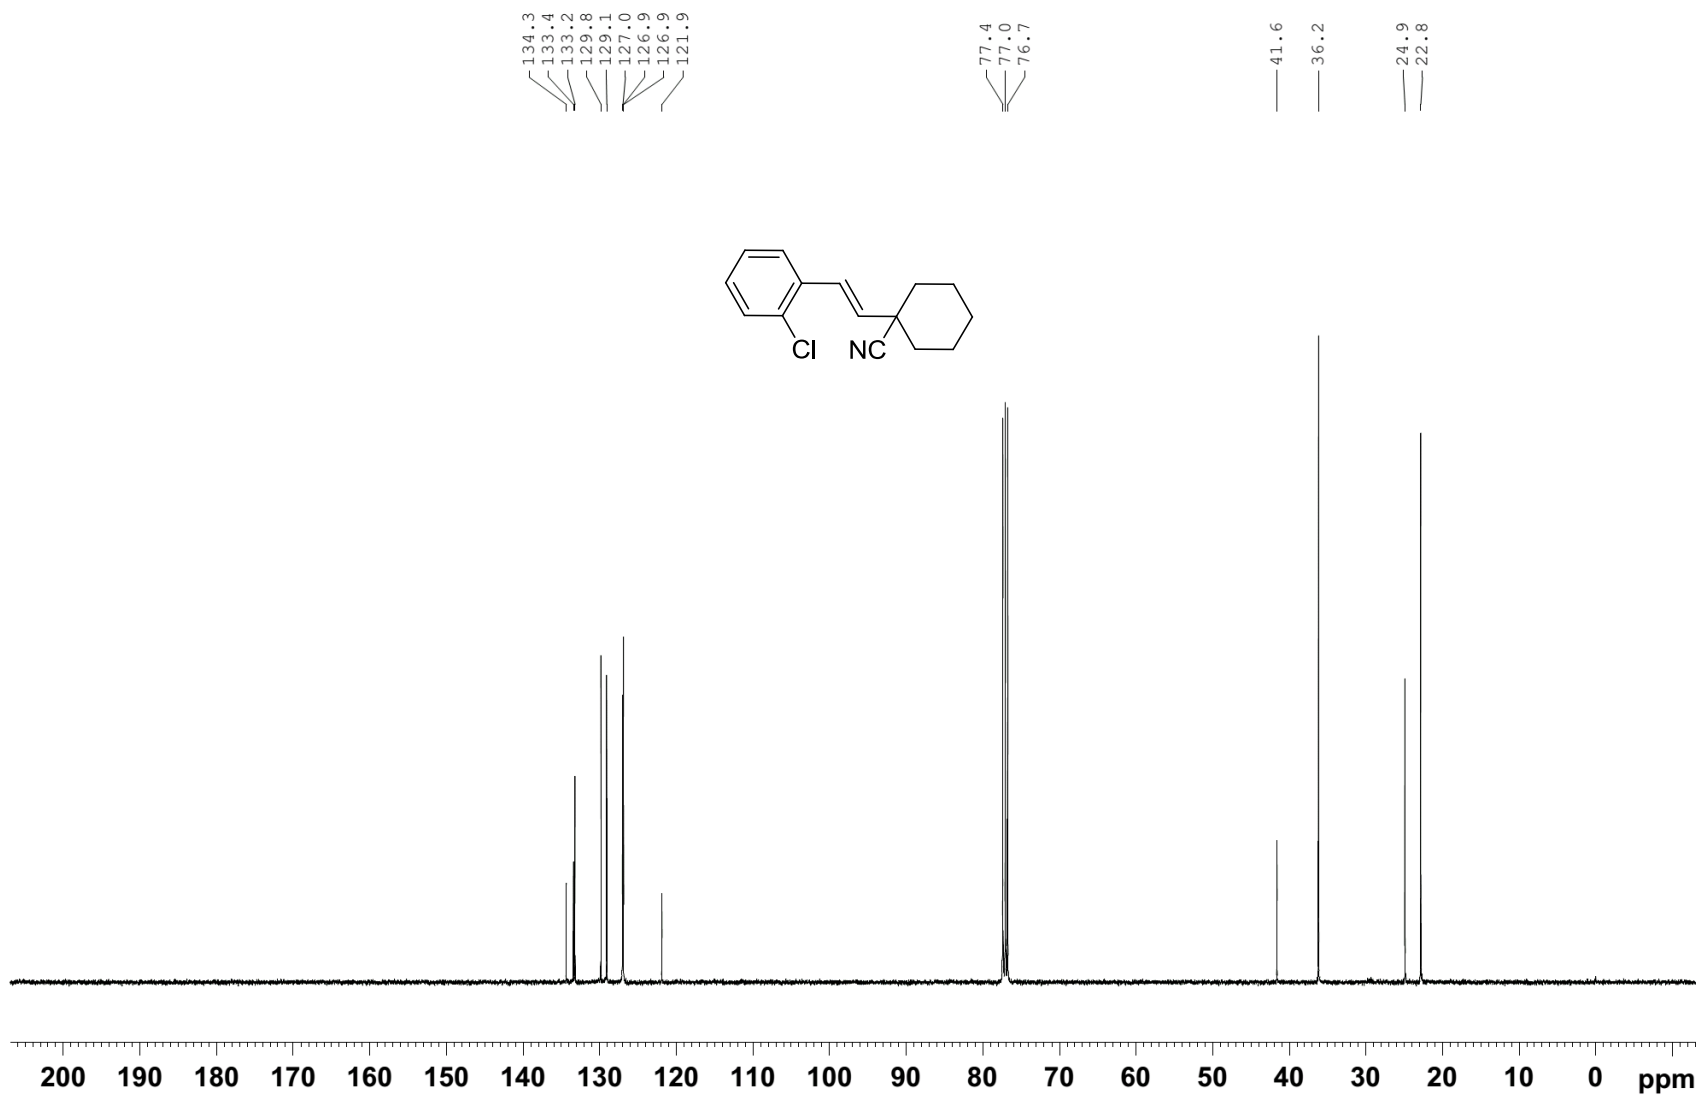

GB-140120-2-HNMR

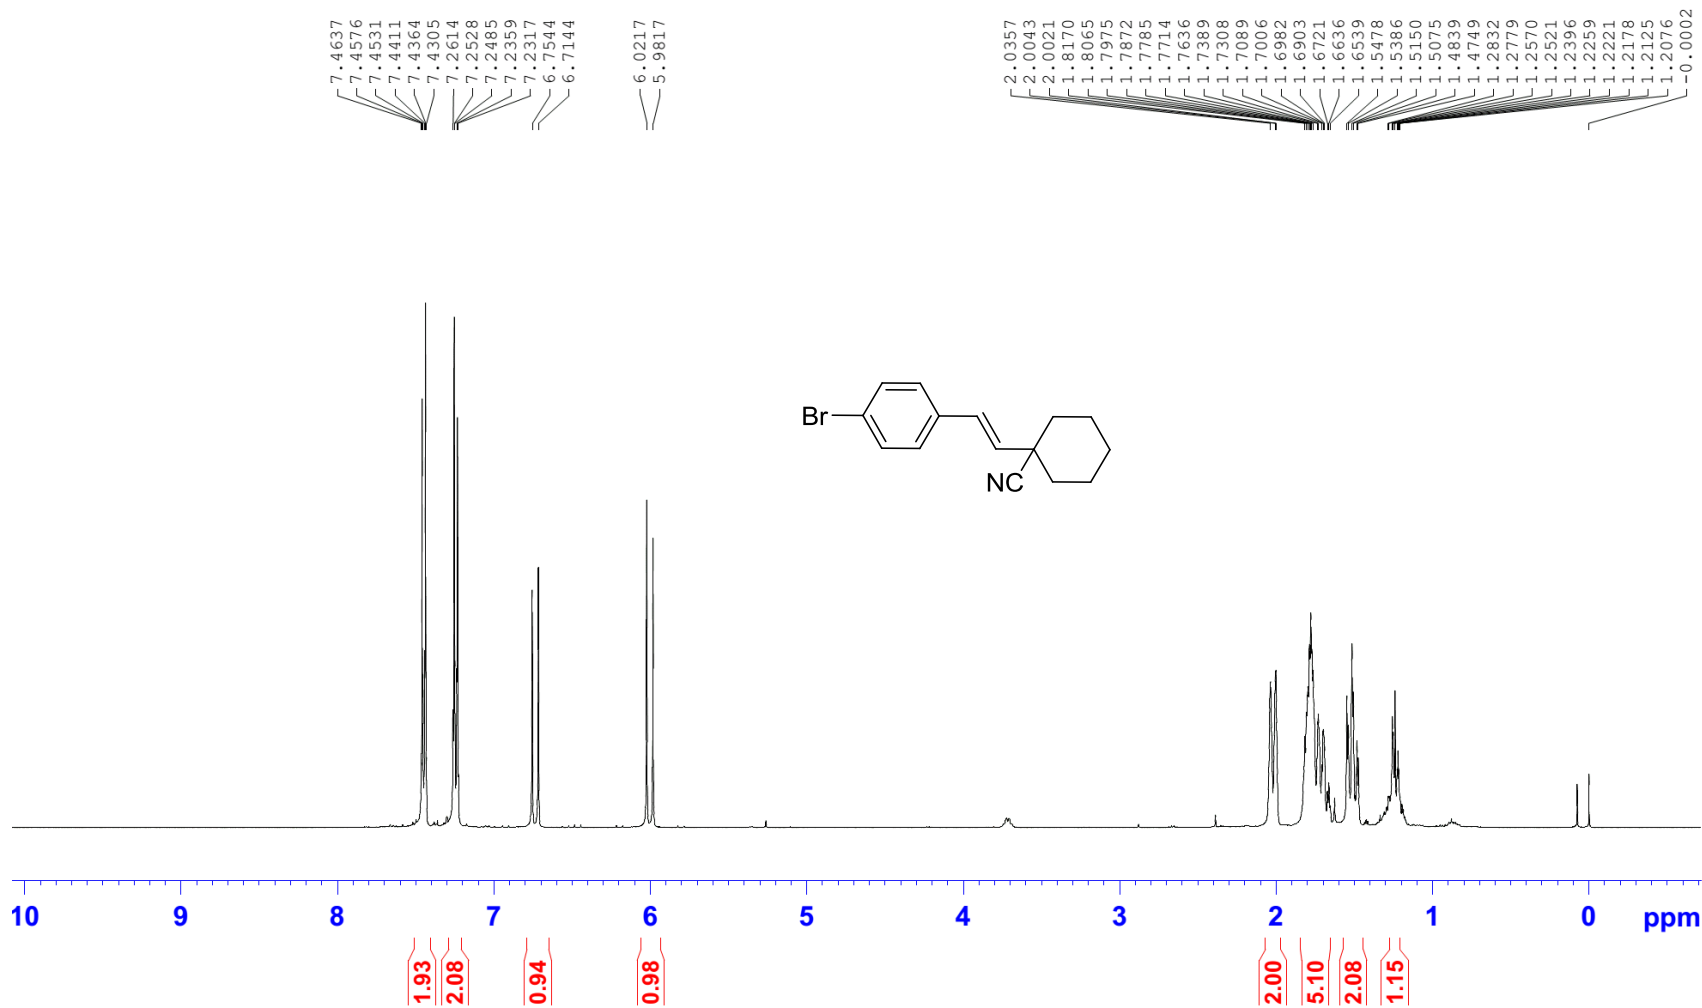

GB-140120-2-CNMR

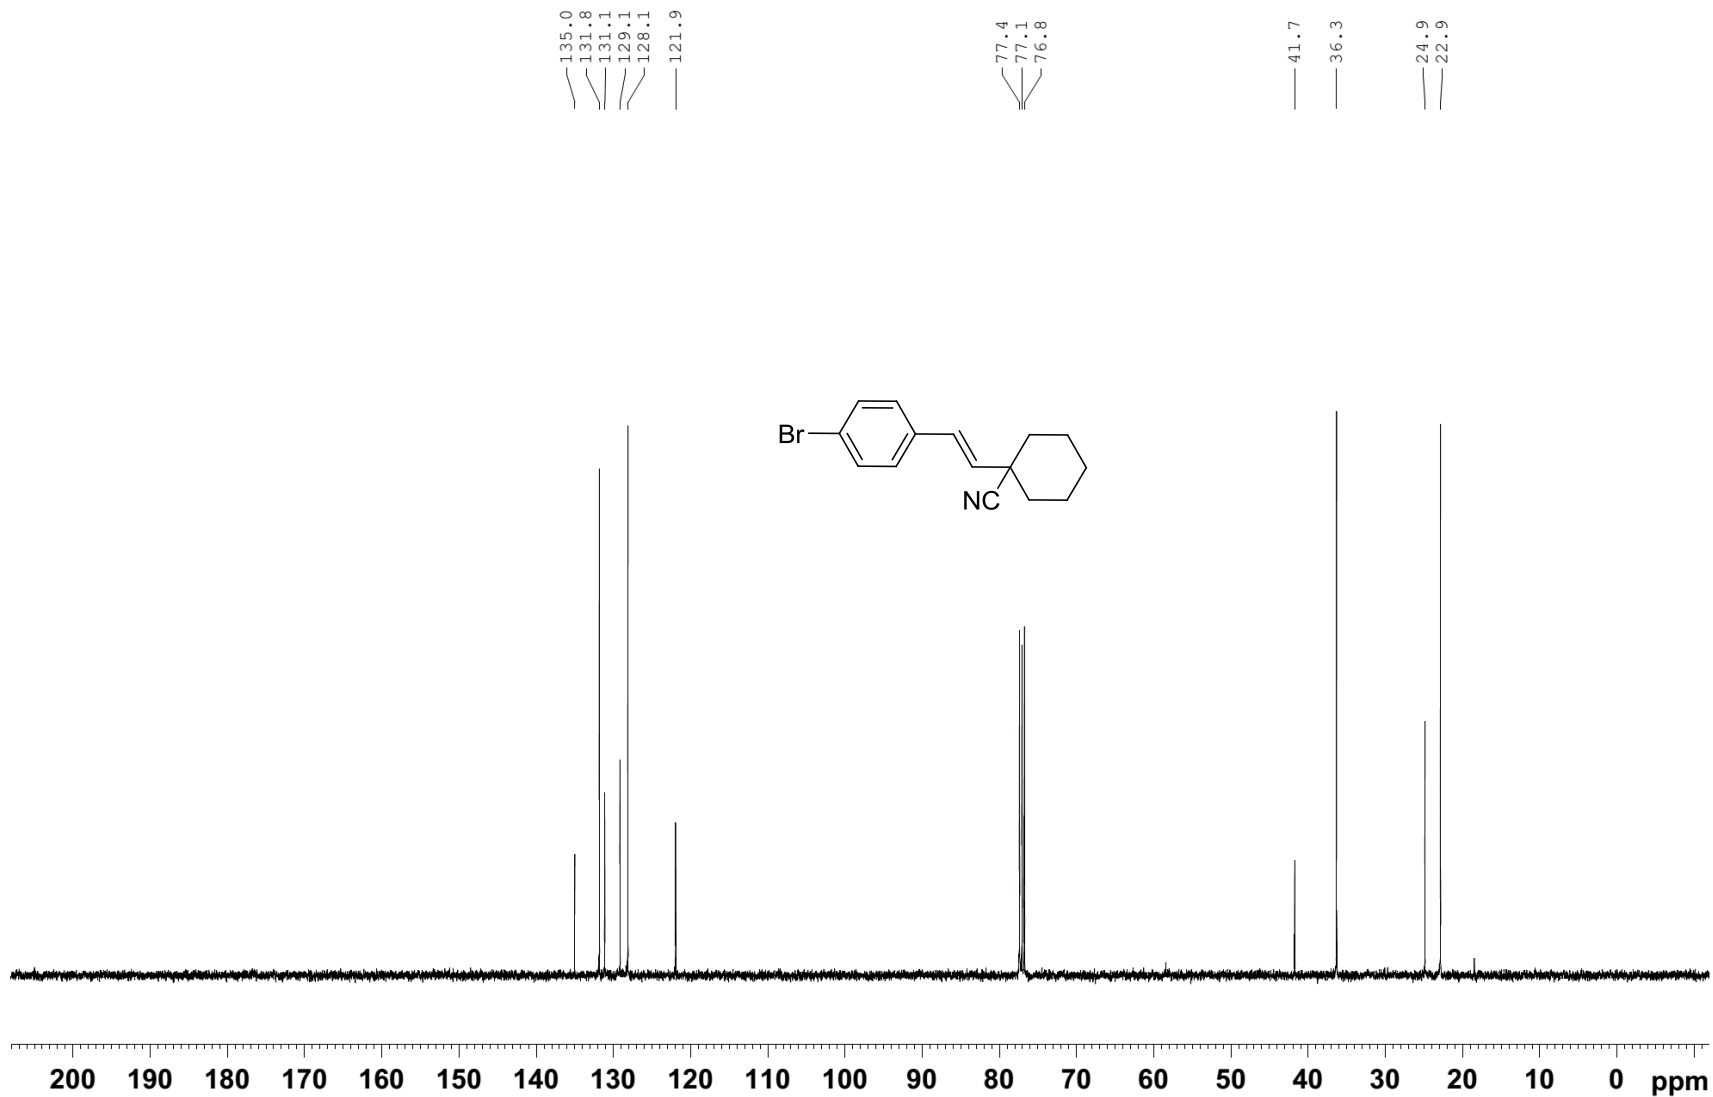

GB-140224-1-HNMR

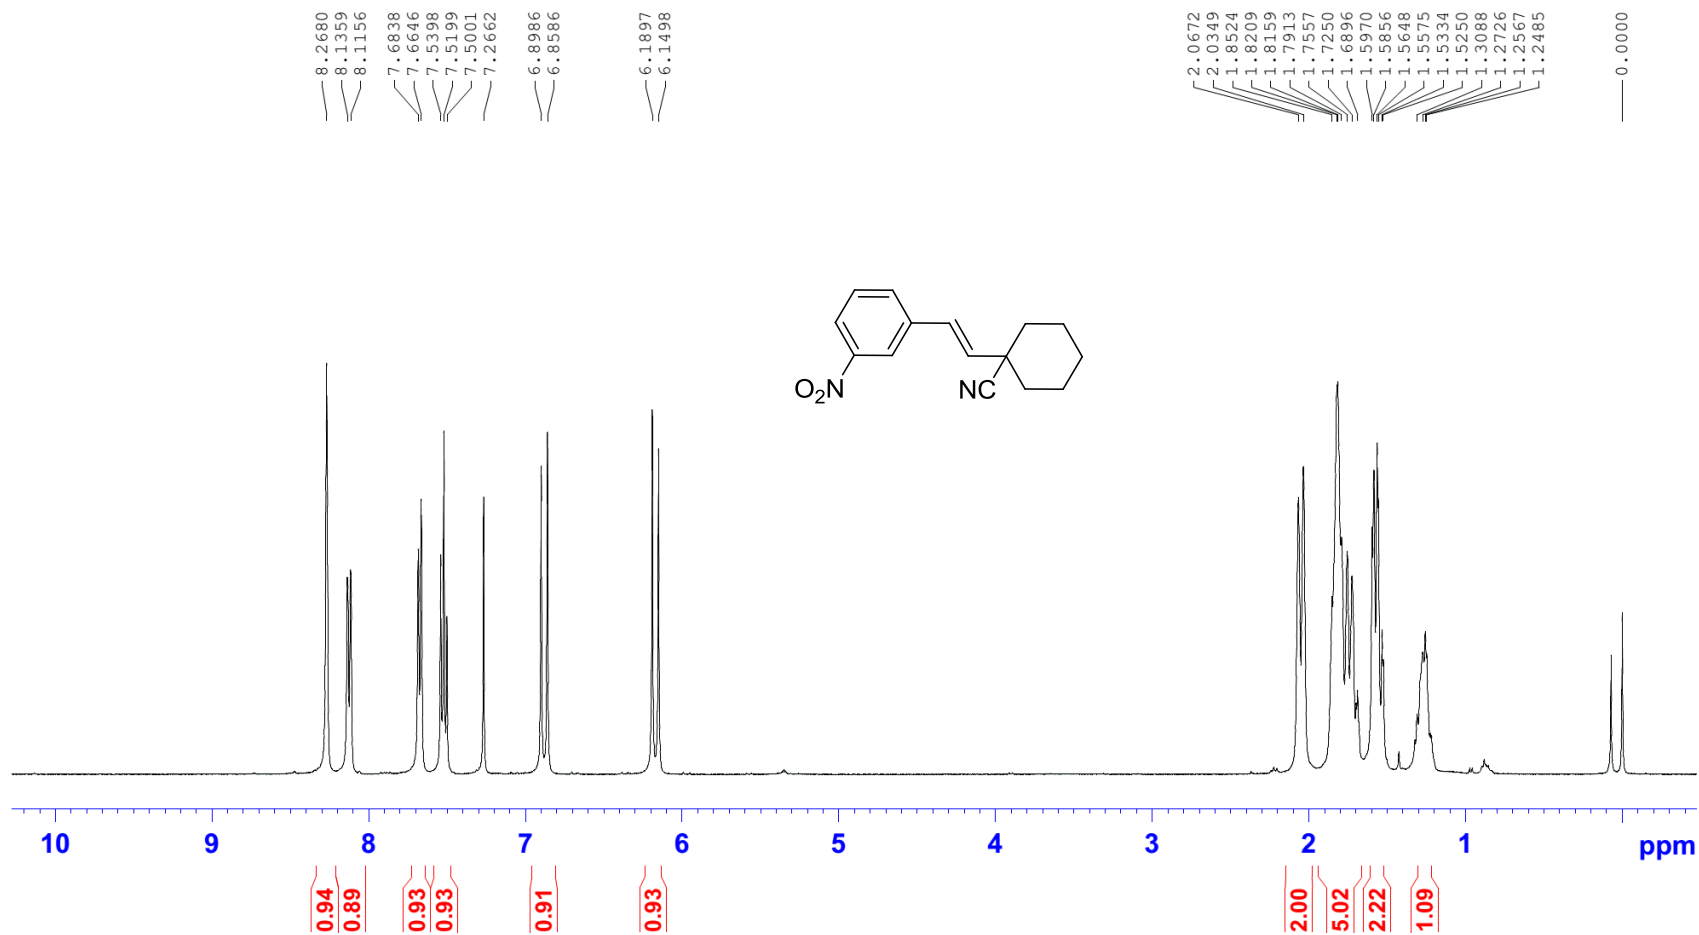



GB-140224-1-CNMR

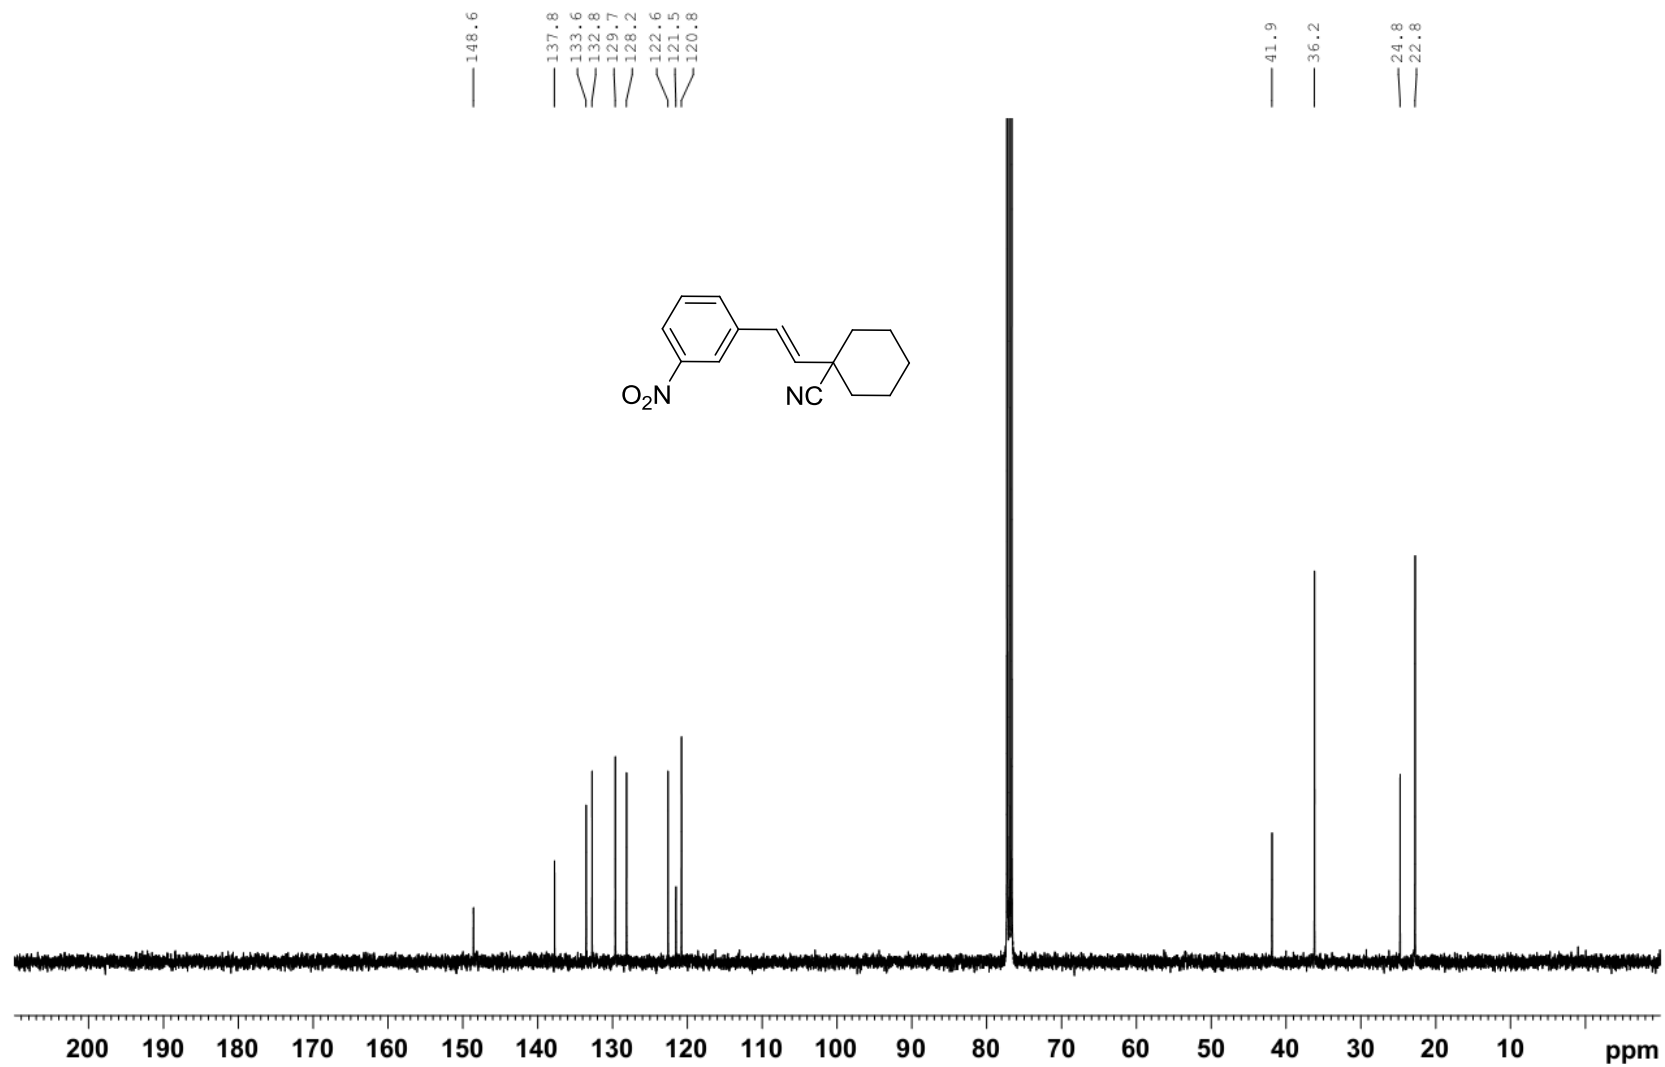

GB-140120-4-HNMR

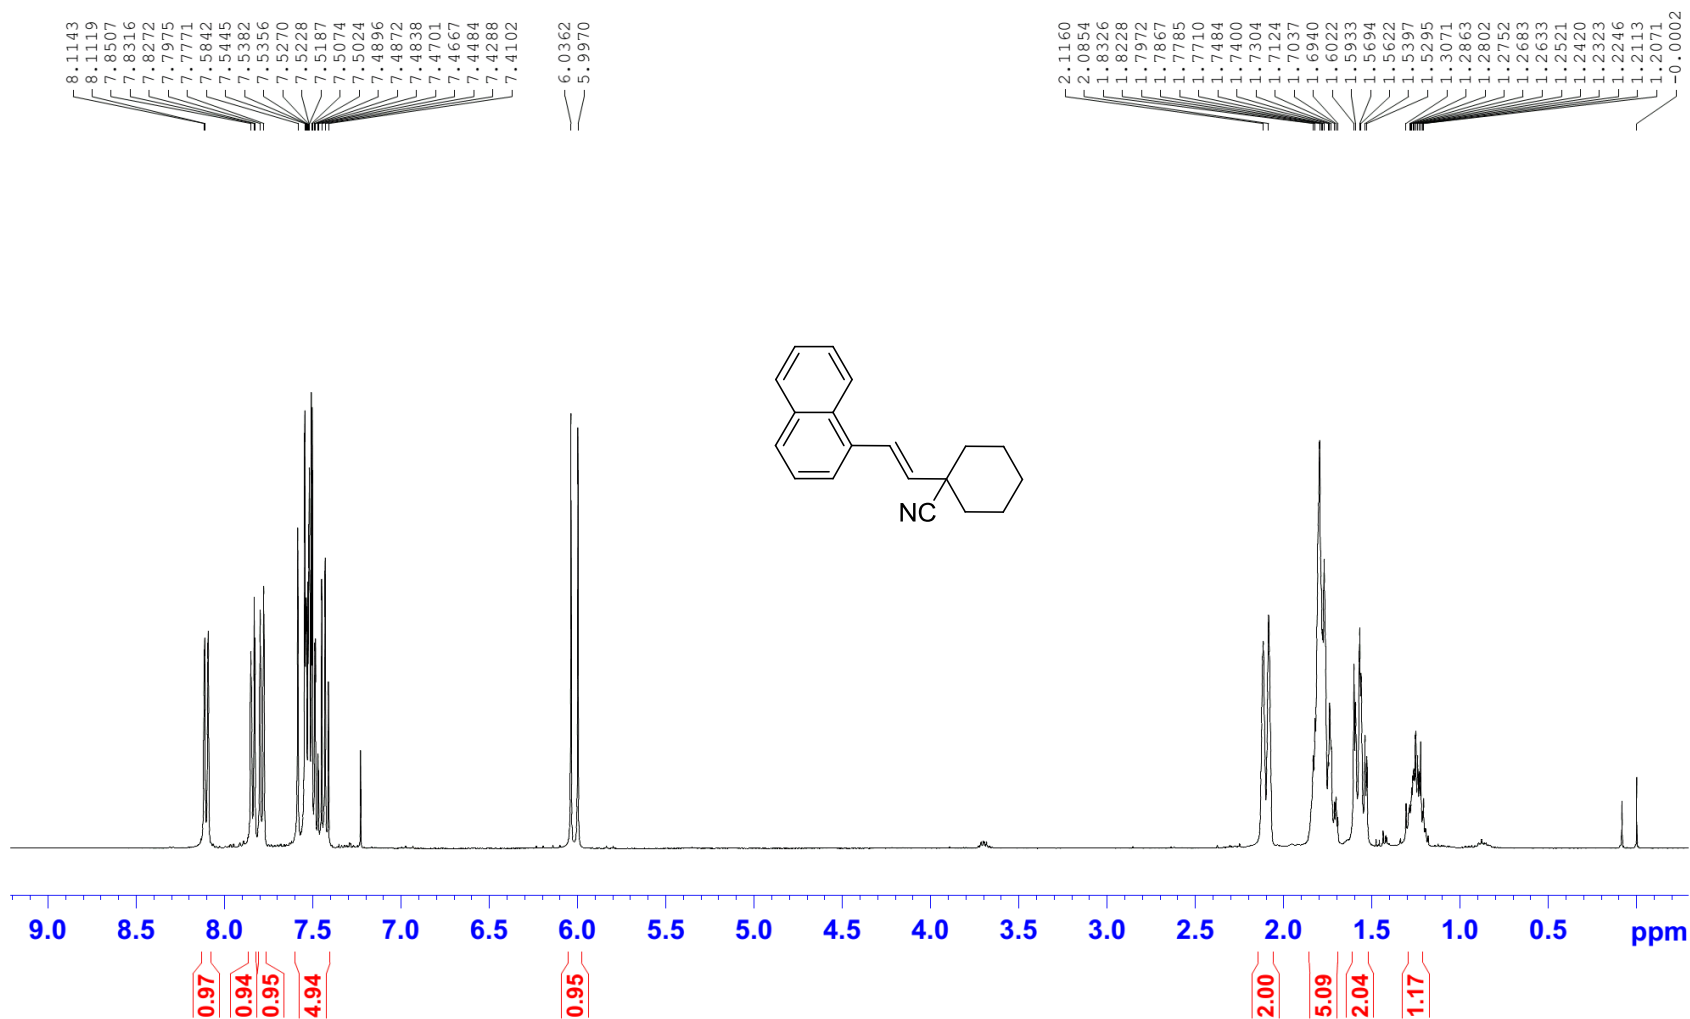

GB-140120-4-CNMR

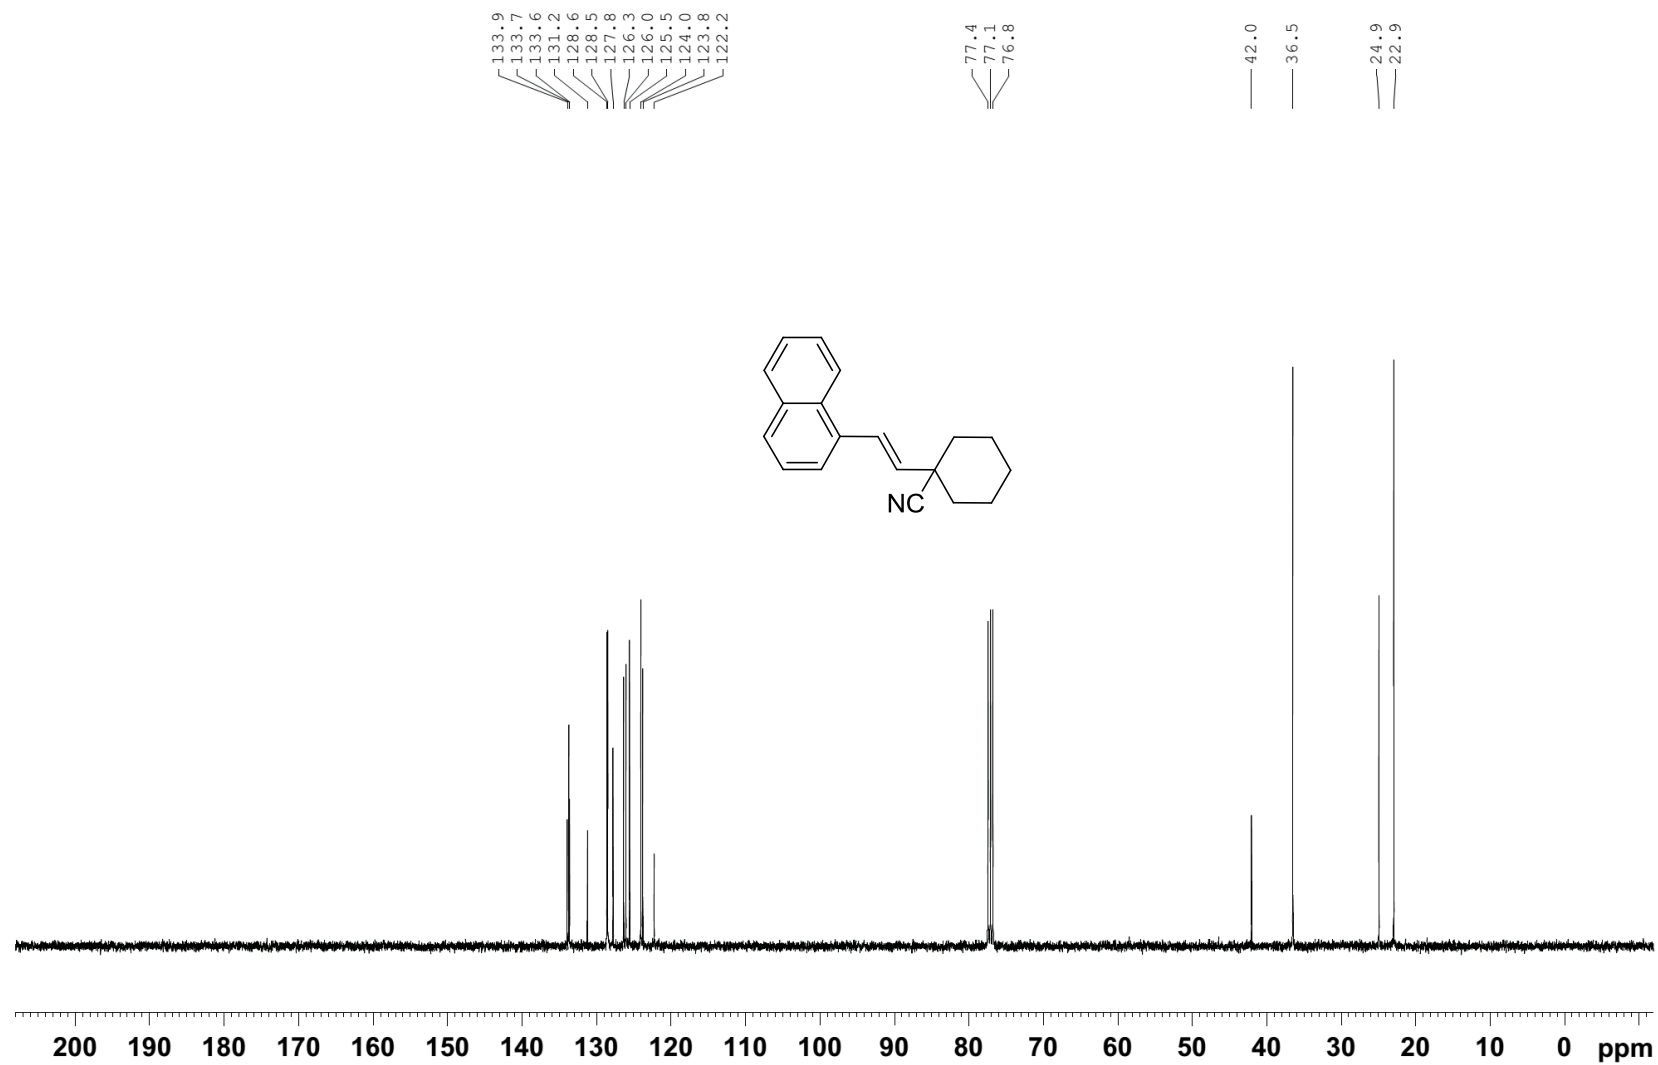

GB-X140409-1-HNMR

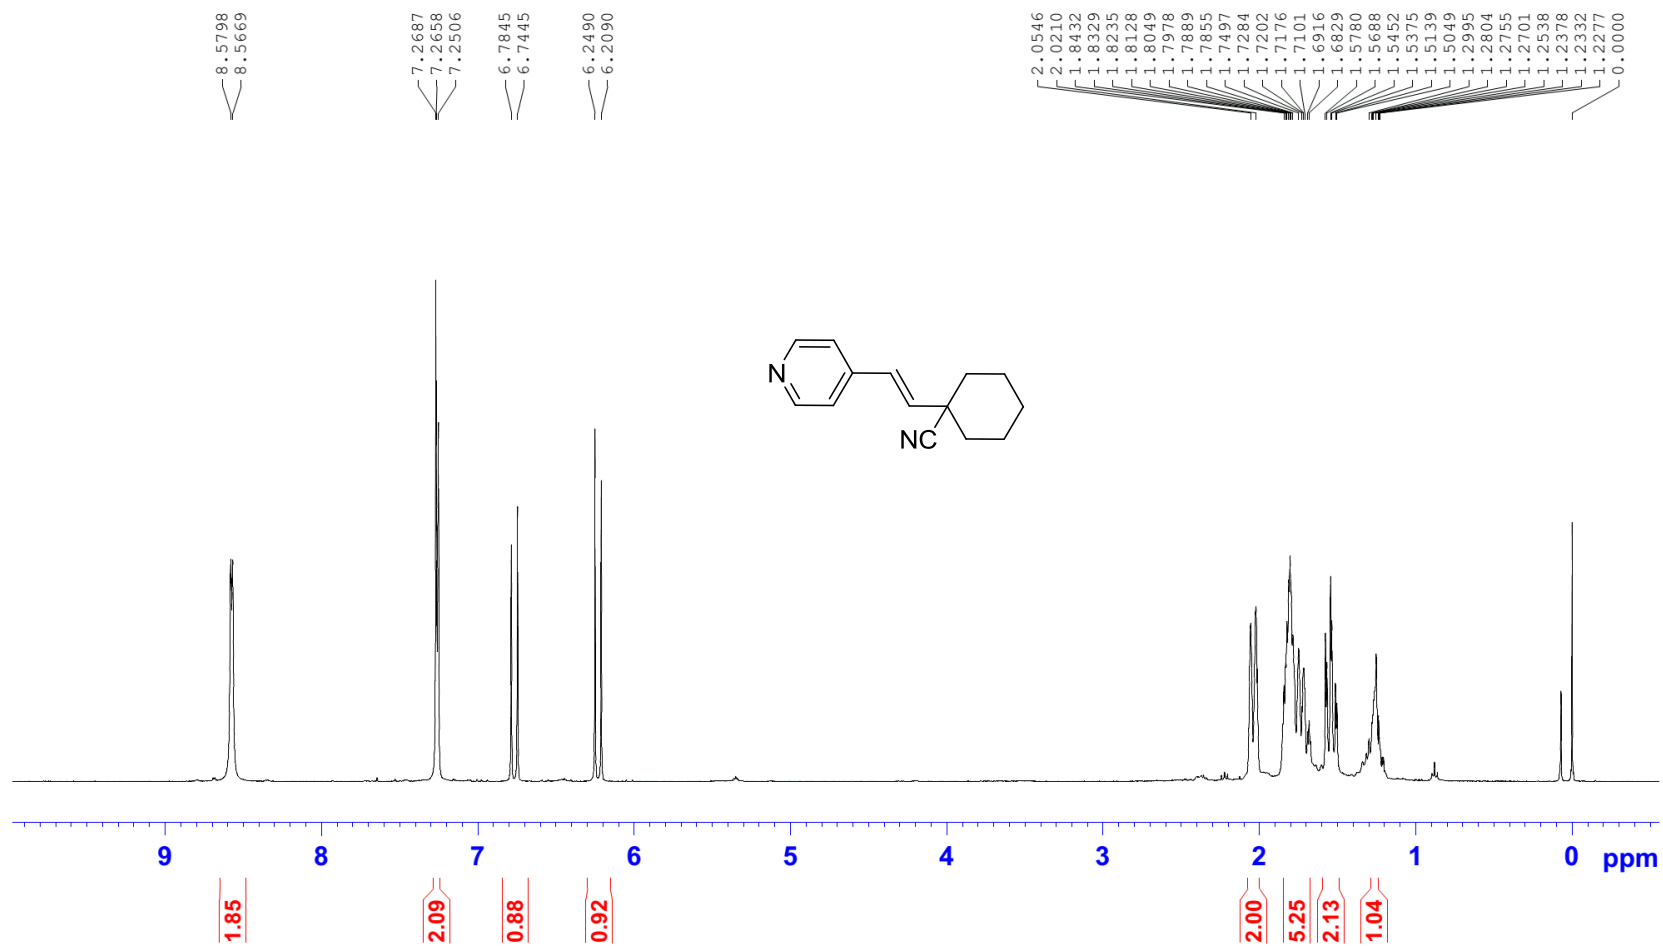

GB-X140409-1-CNMR

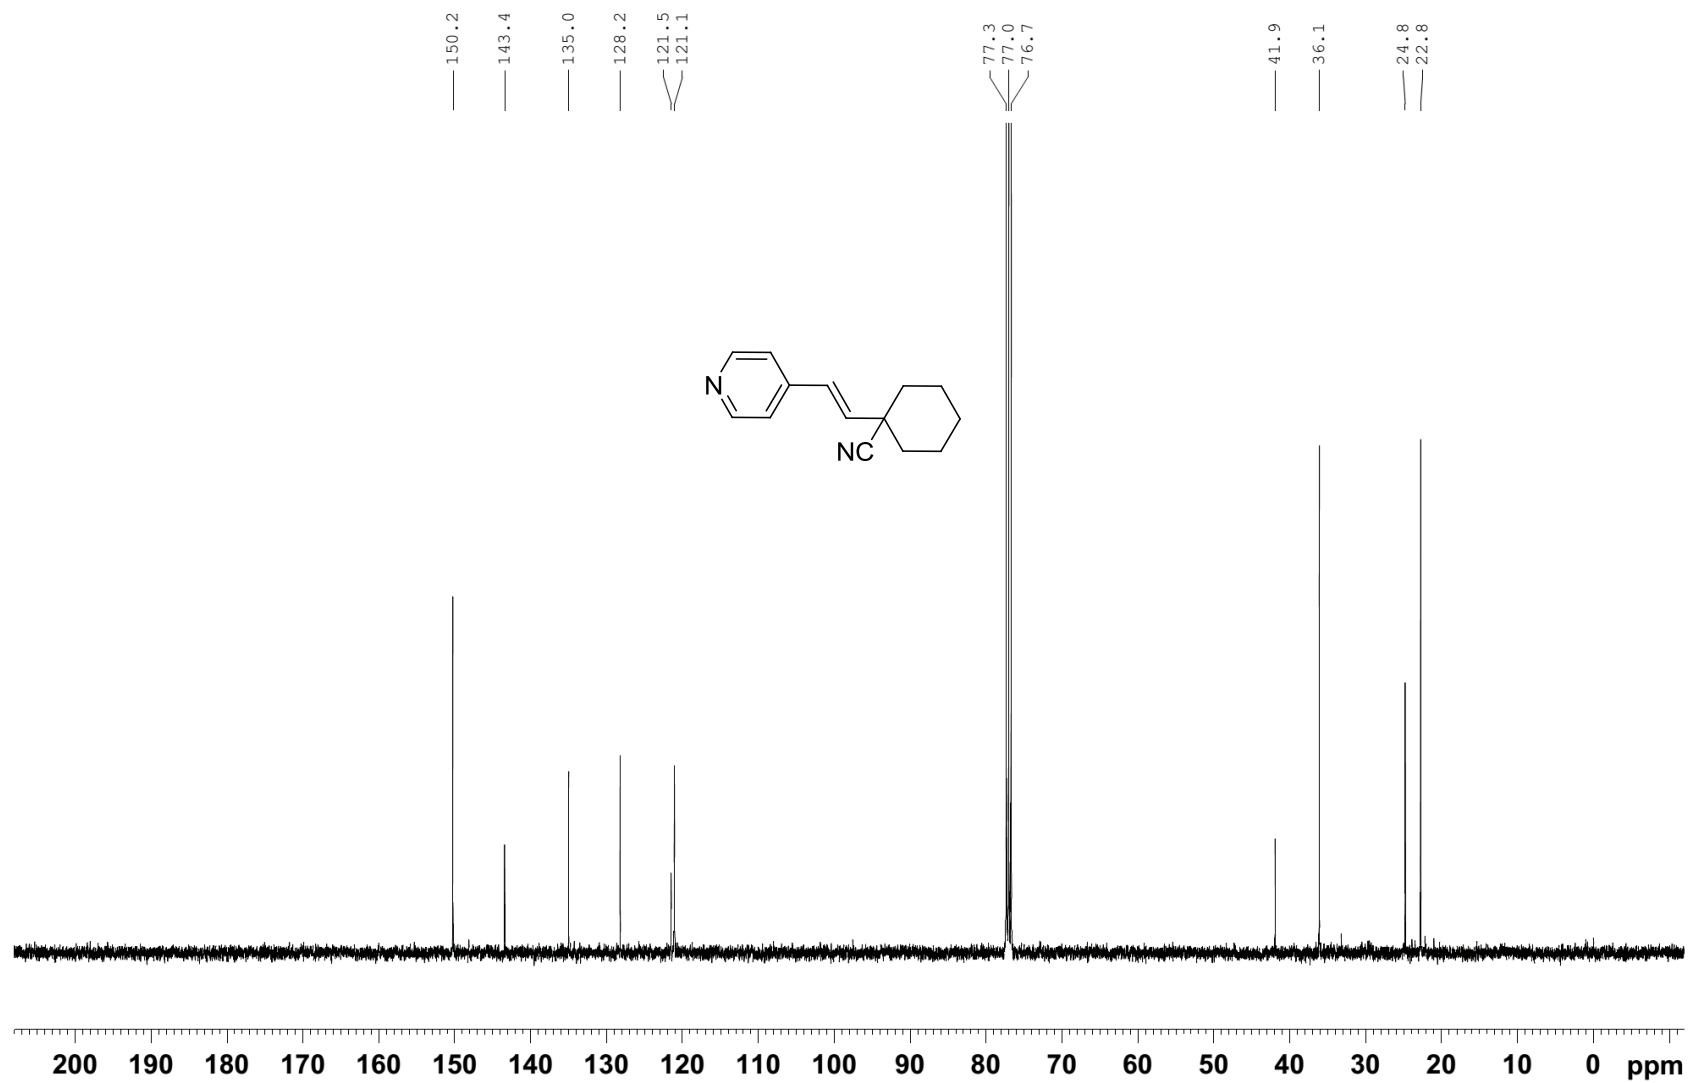

GB-140310-5-HNMR

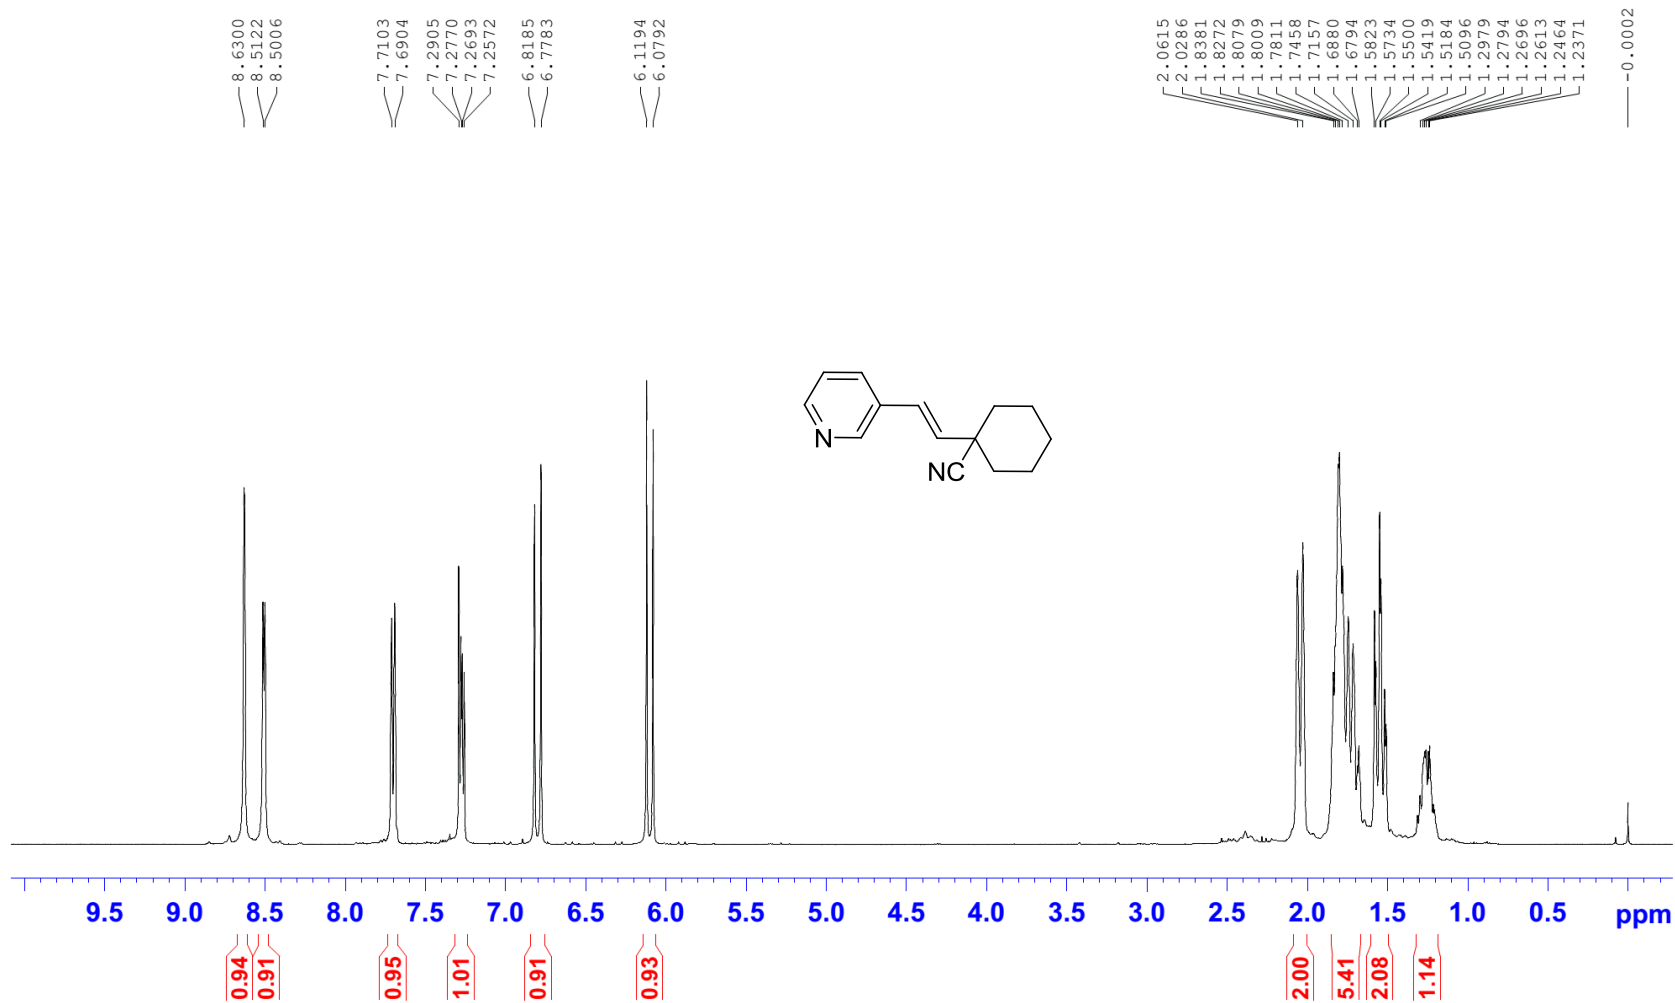

GB-140310-5-CNMR

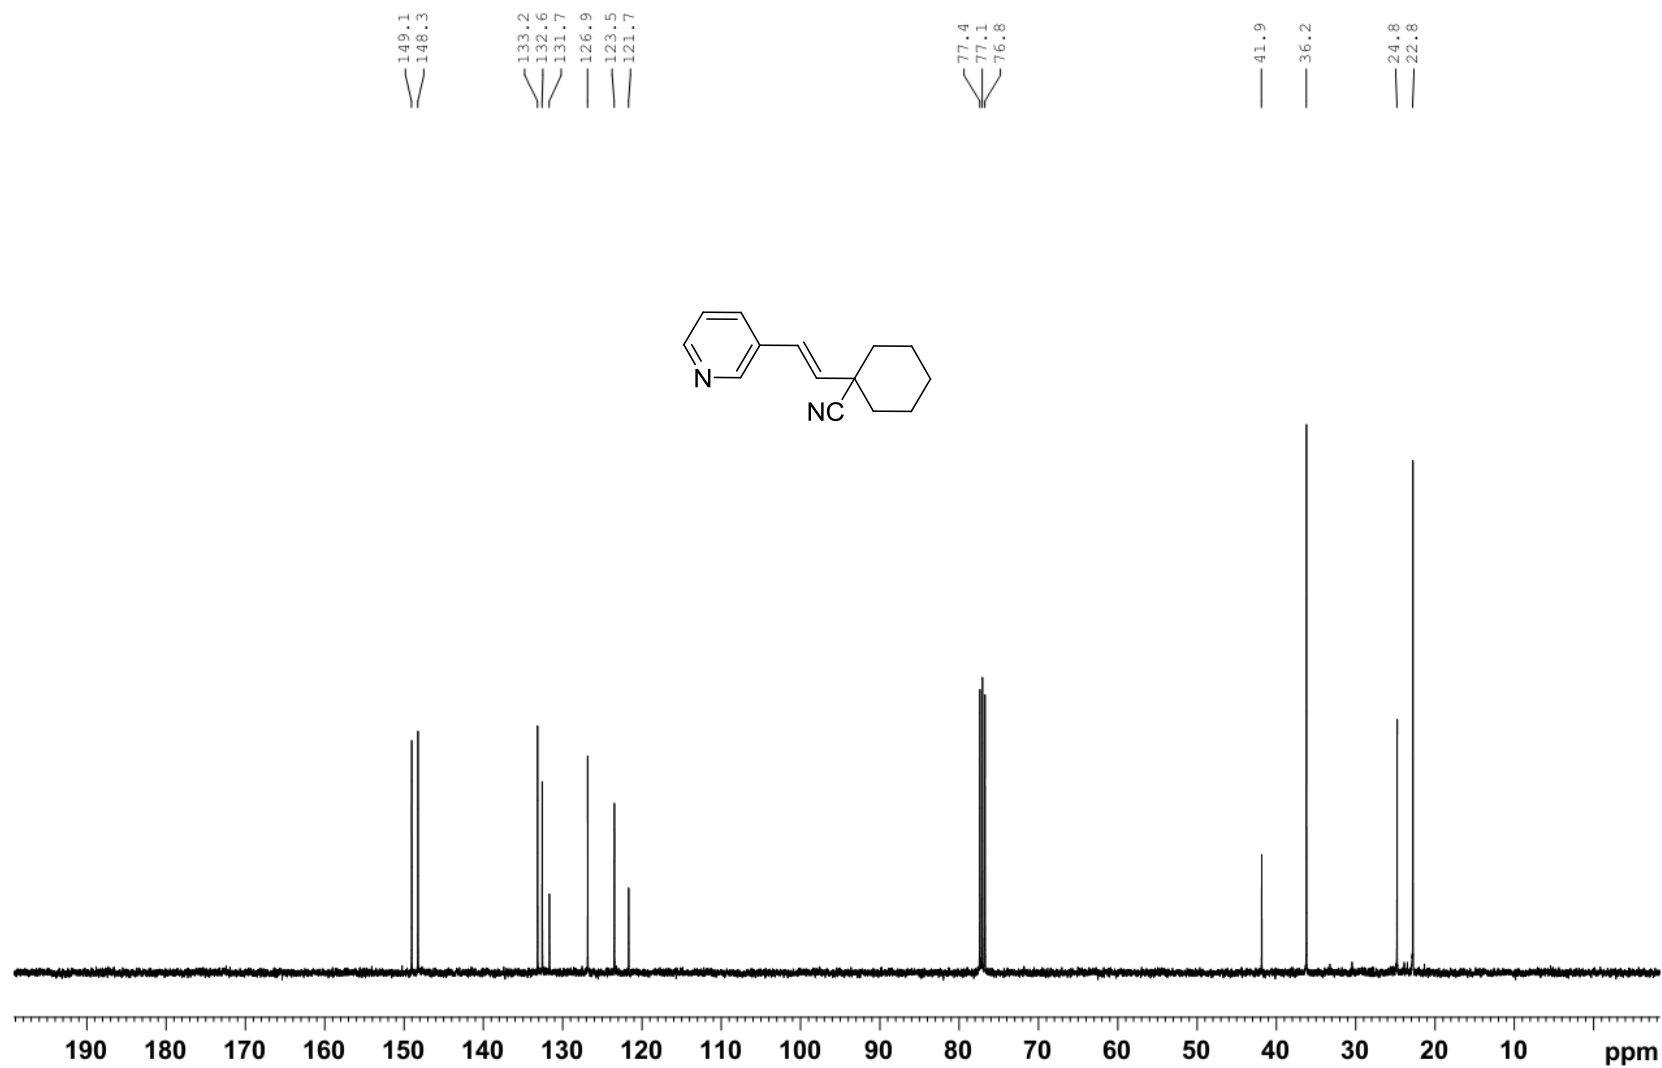

GB-140430-2-HNMR

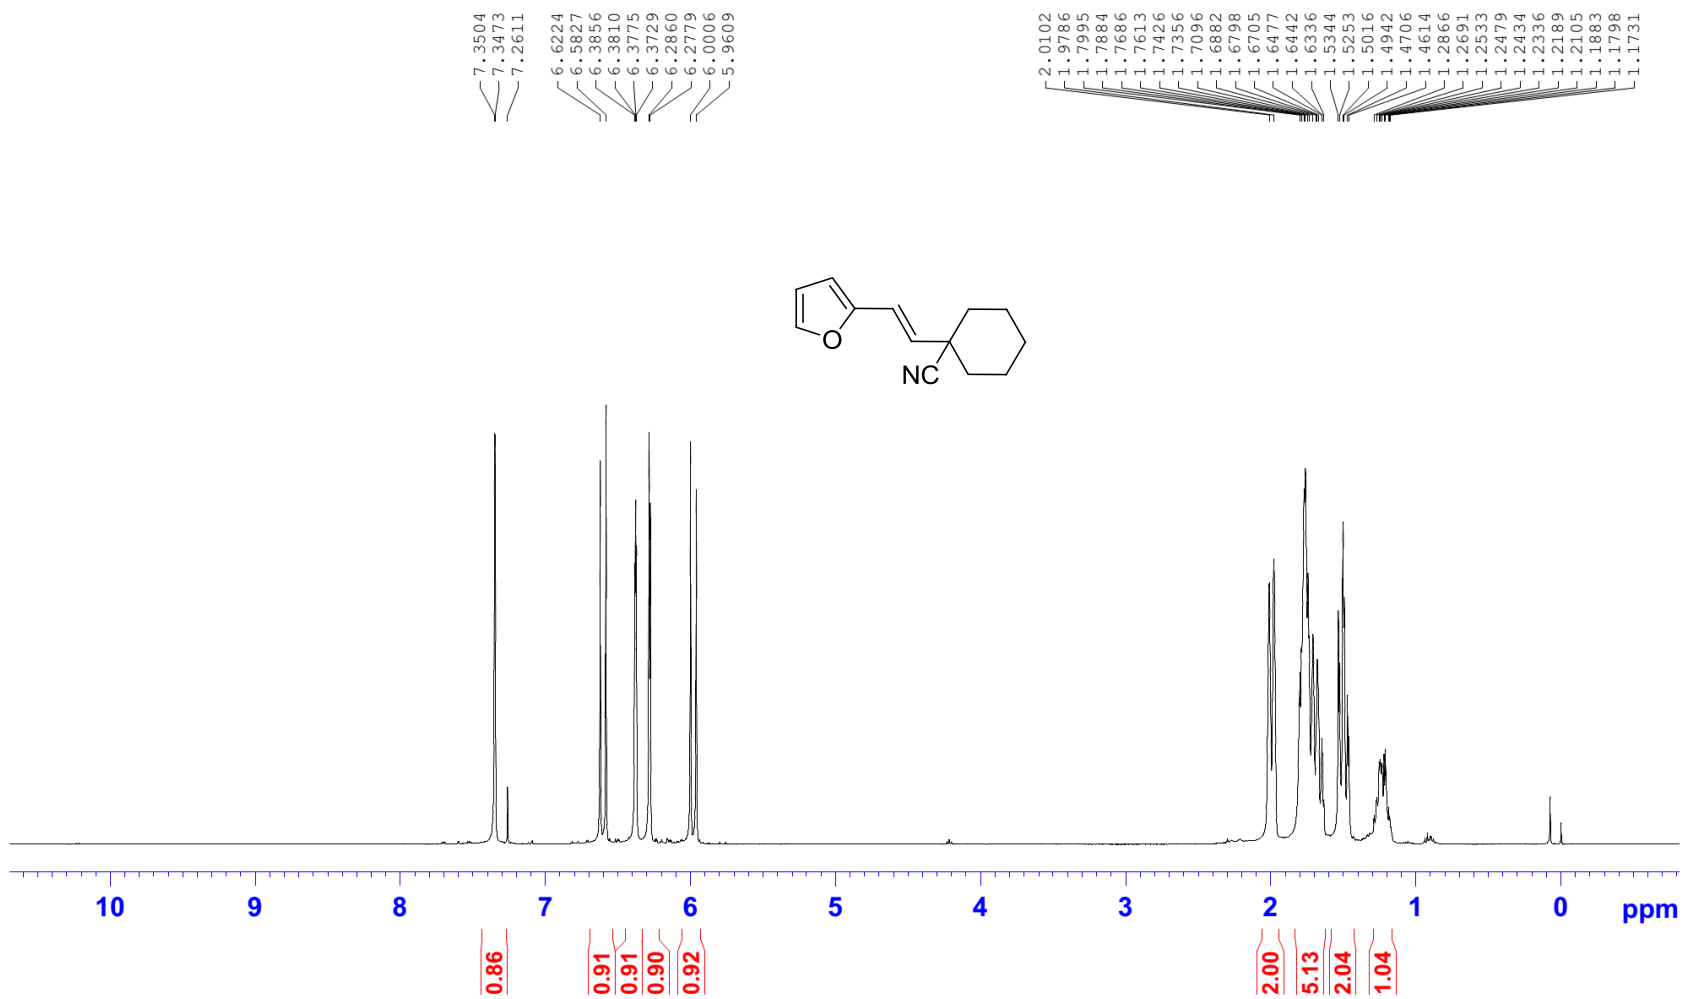



GB-140430-2-CNMR

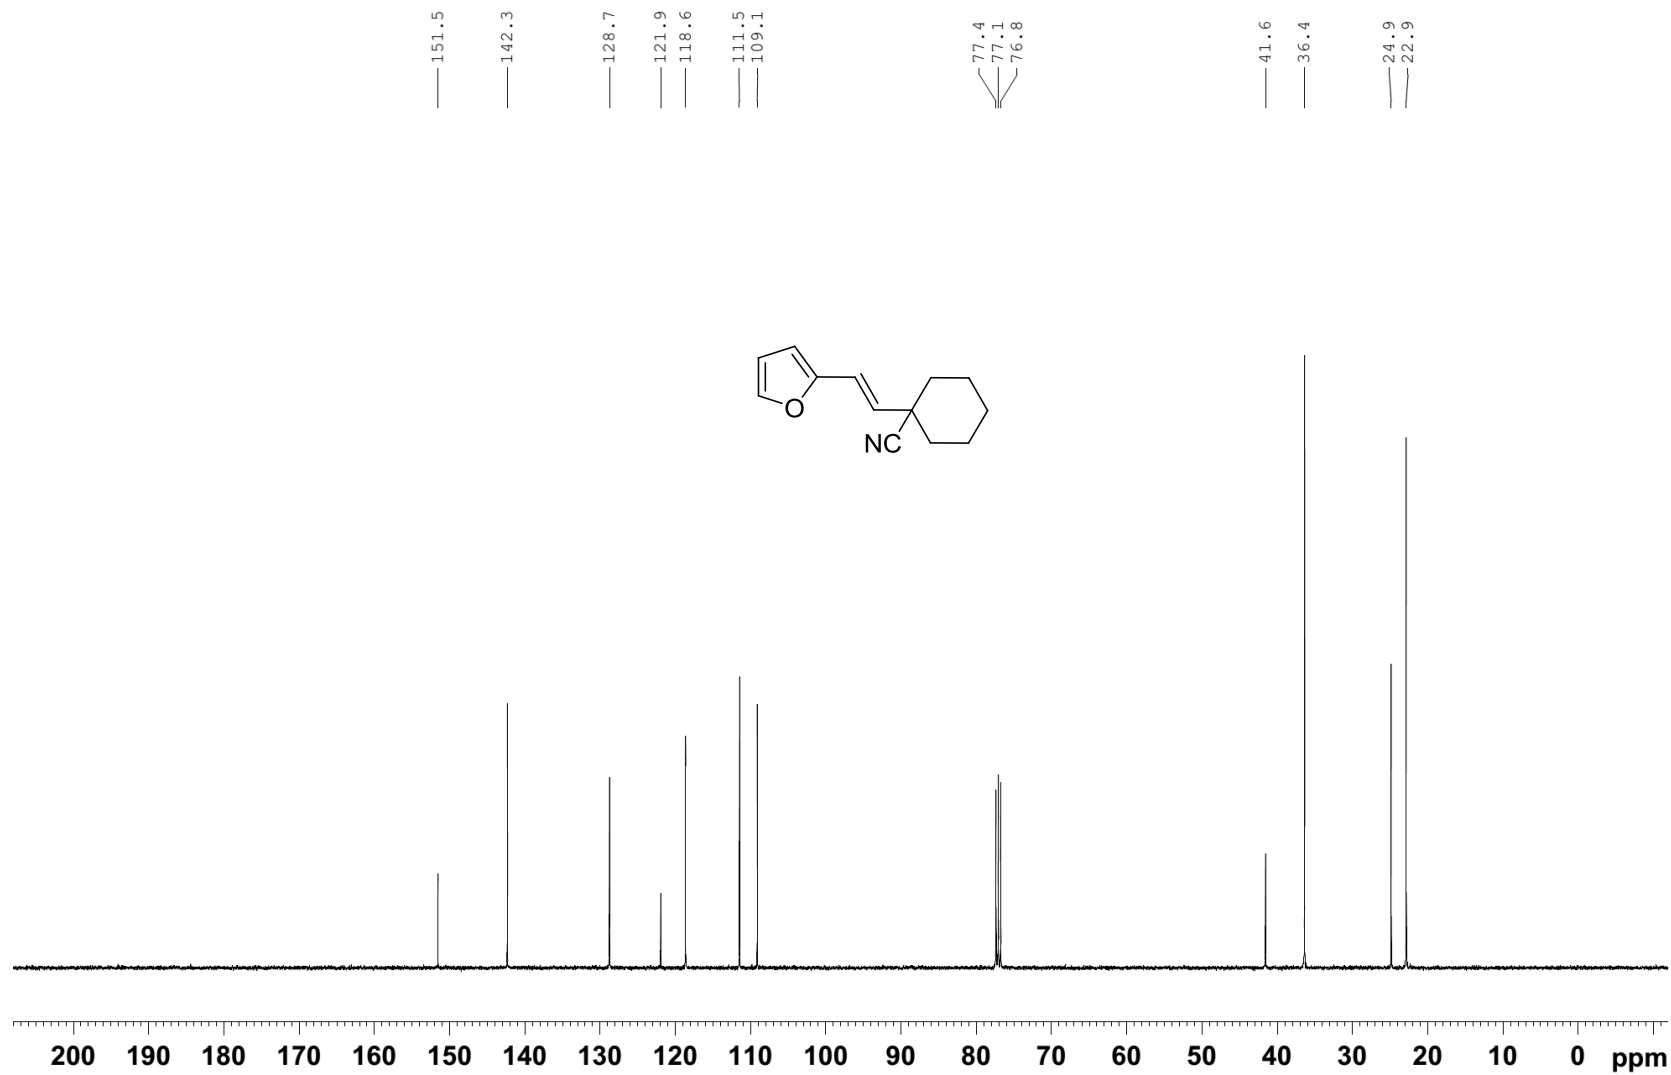

GB-131230-1-HNMR

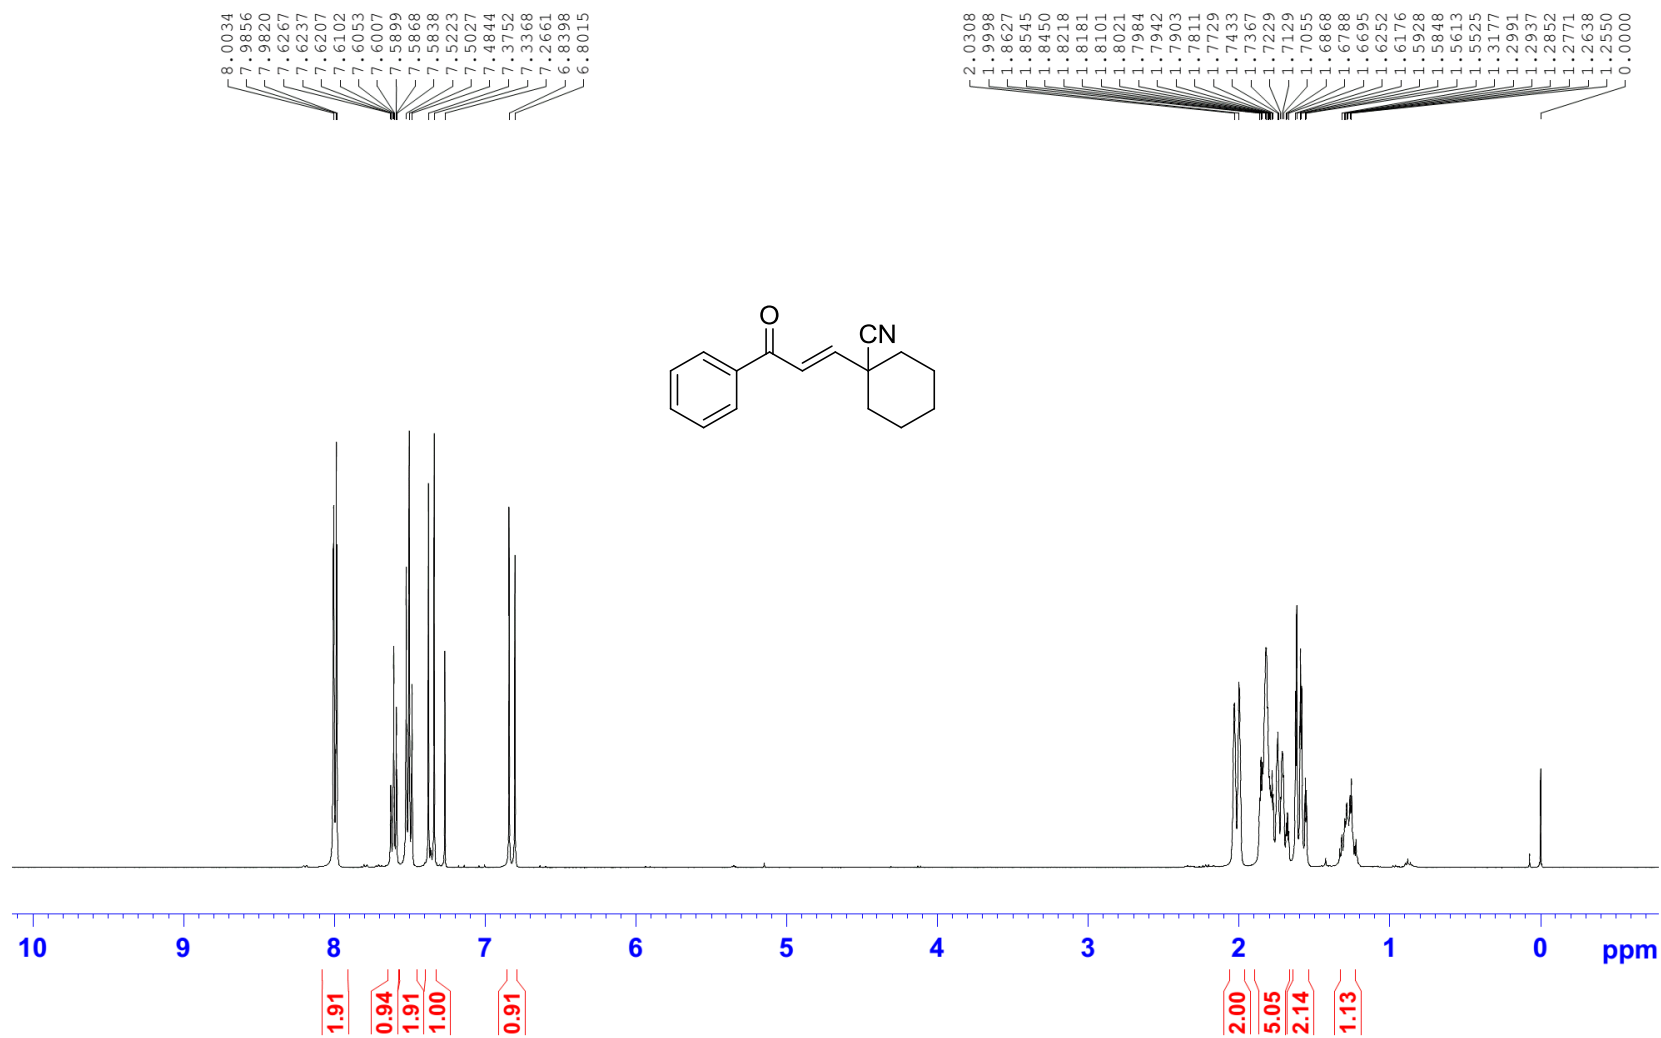

GB-131230-1-CNMR

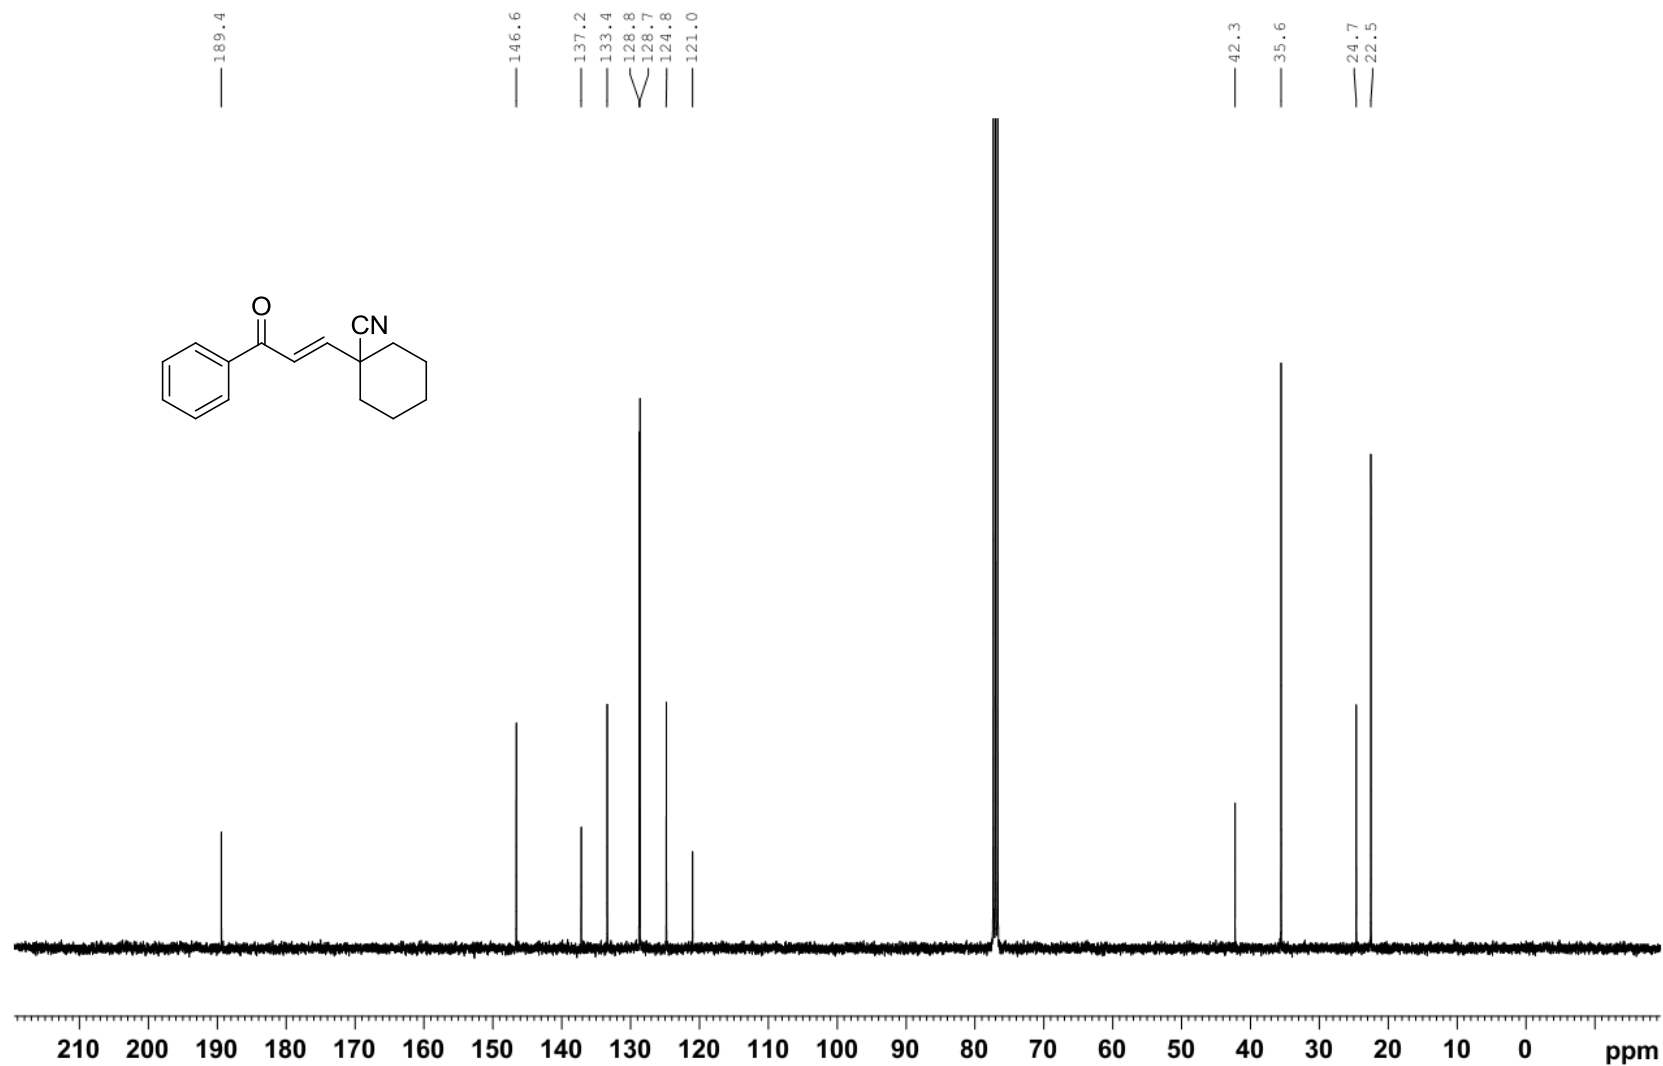

GB-131230-2-HNMR

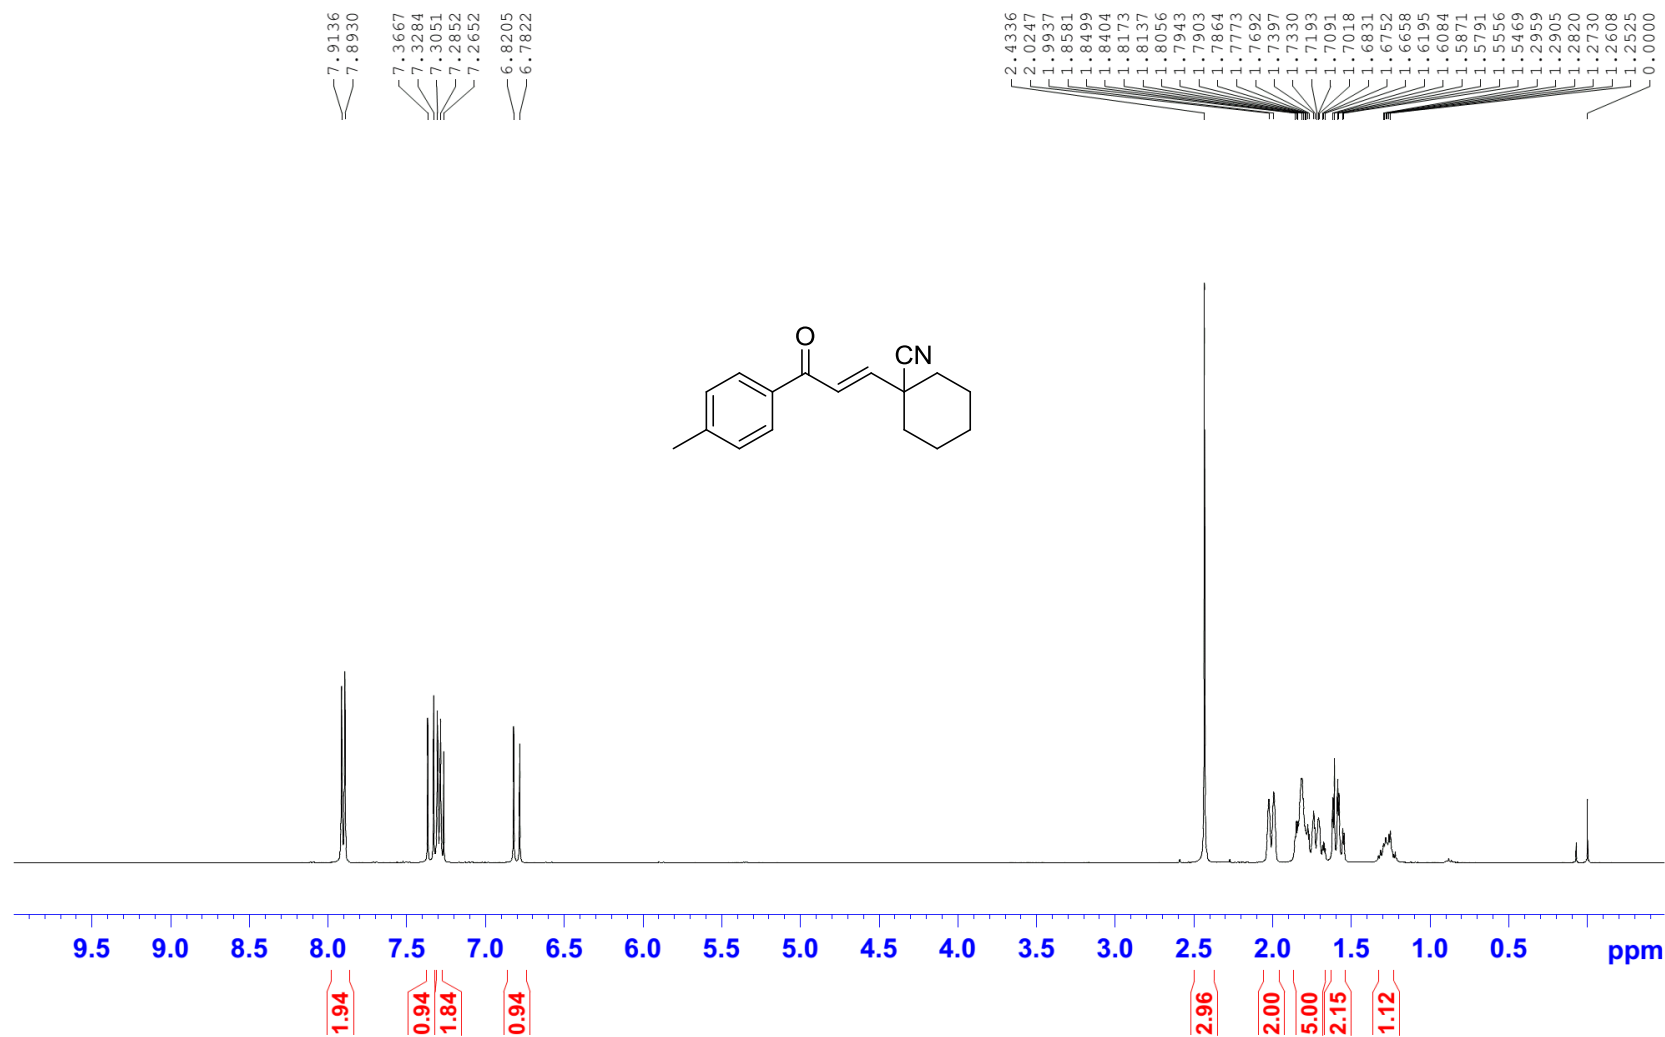

GB-131230-2-CNMR

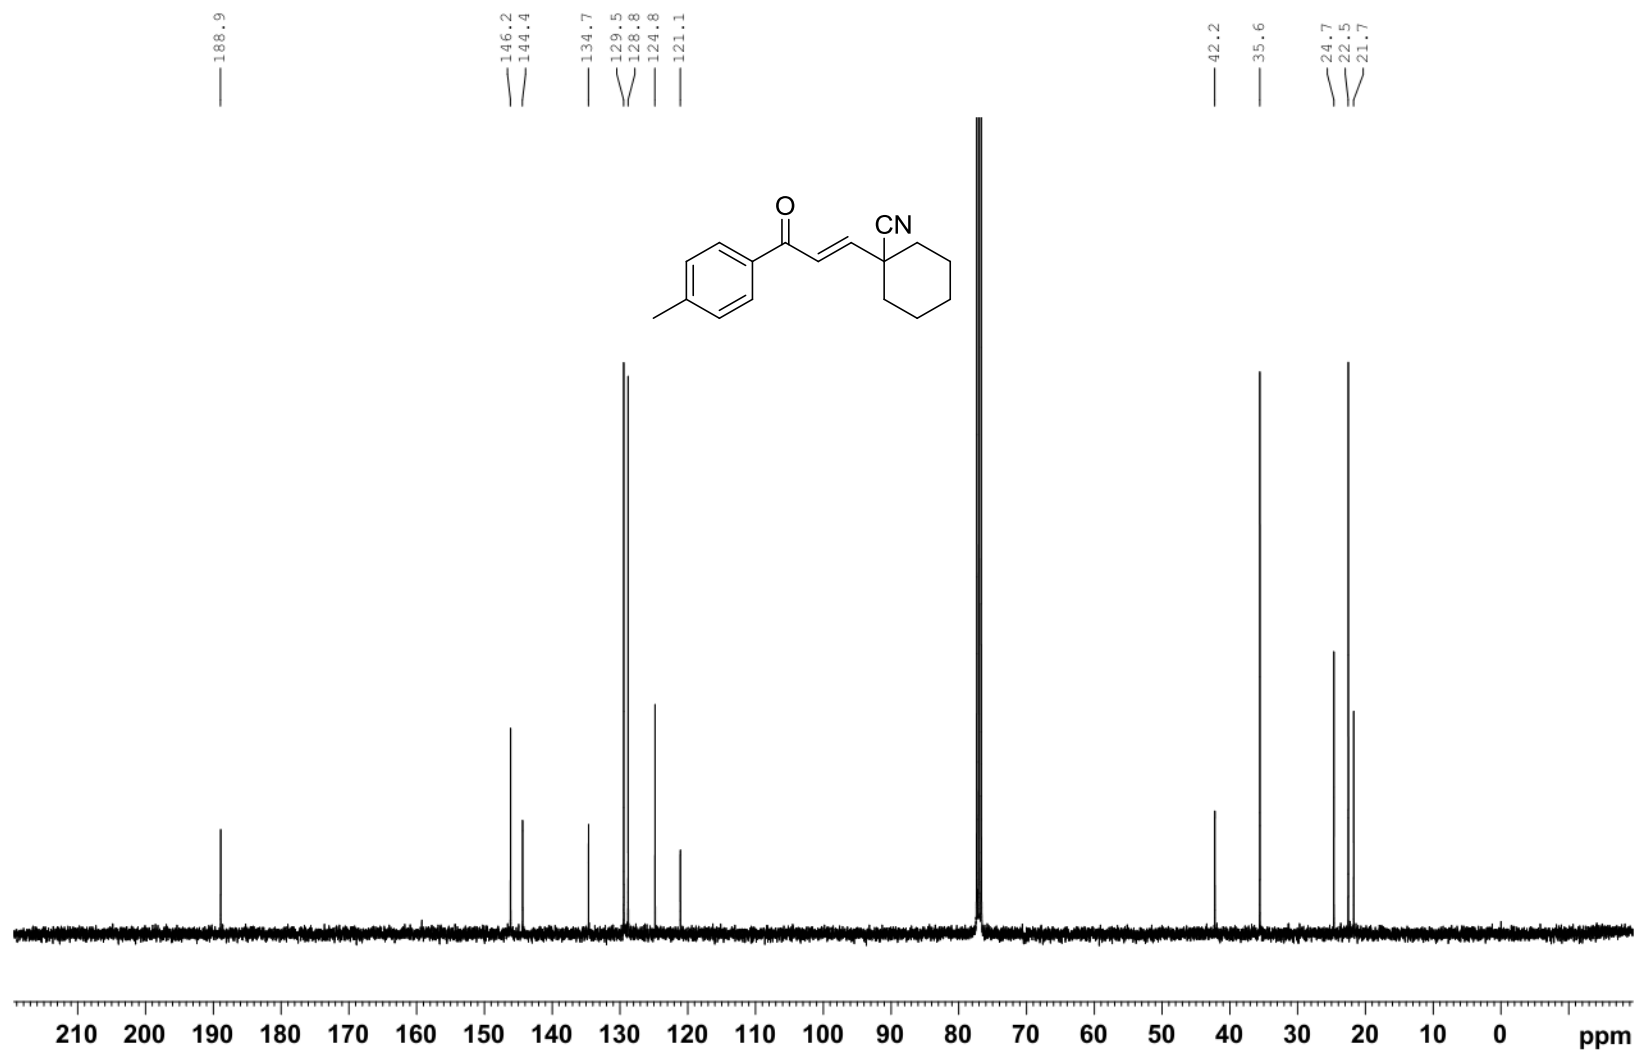

GB-131230-3-HNMR

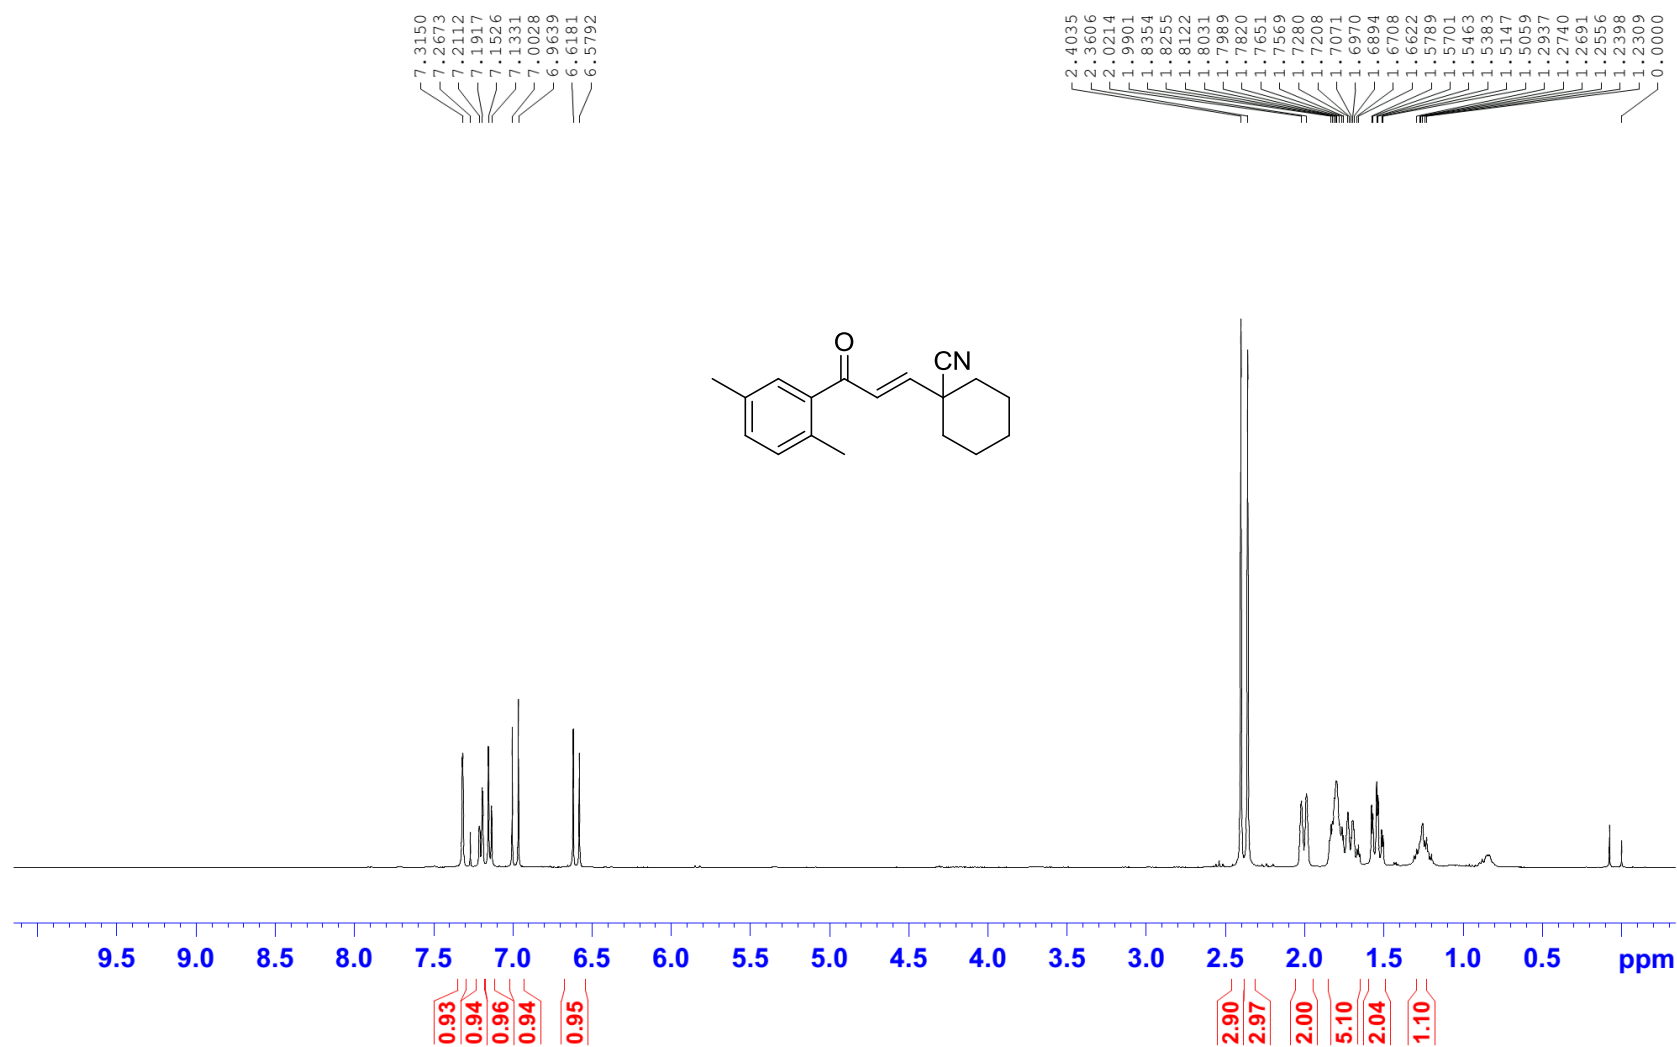

GB-131230-3-CNMR

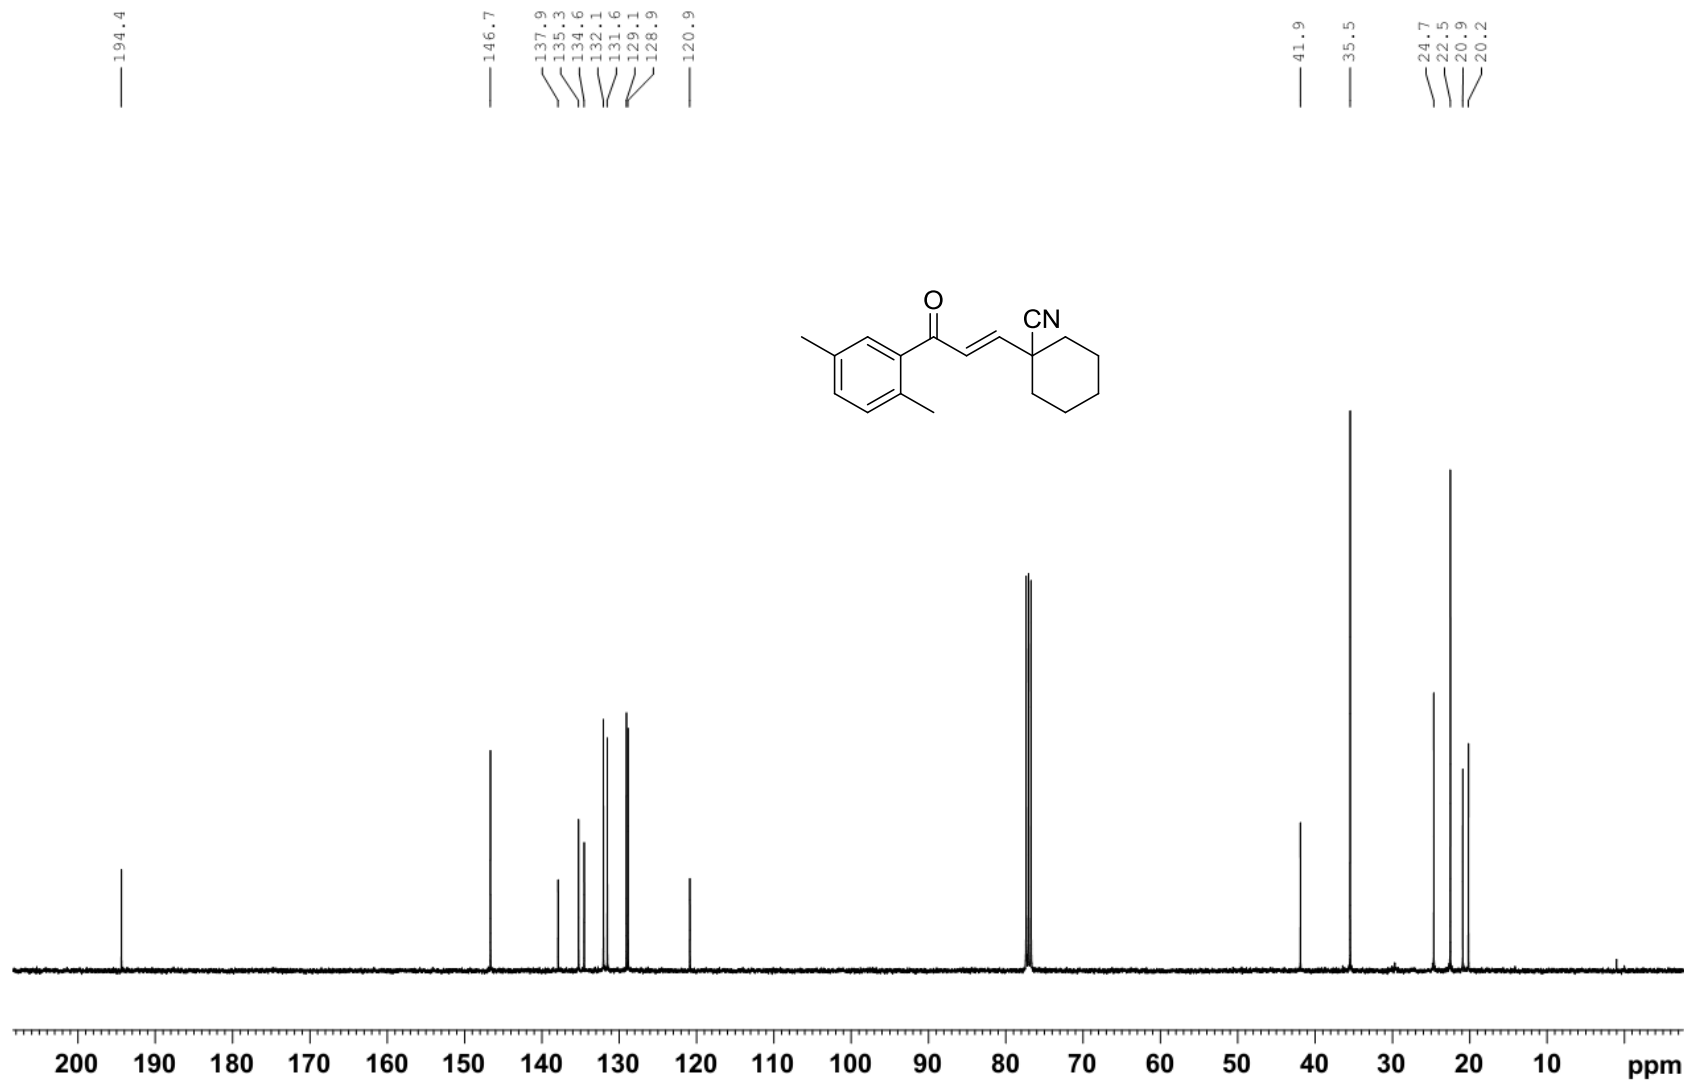

GB-131230-4-HNMR

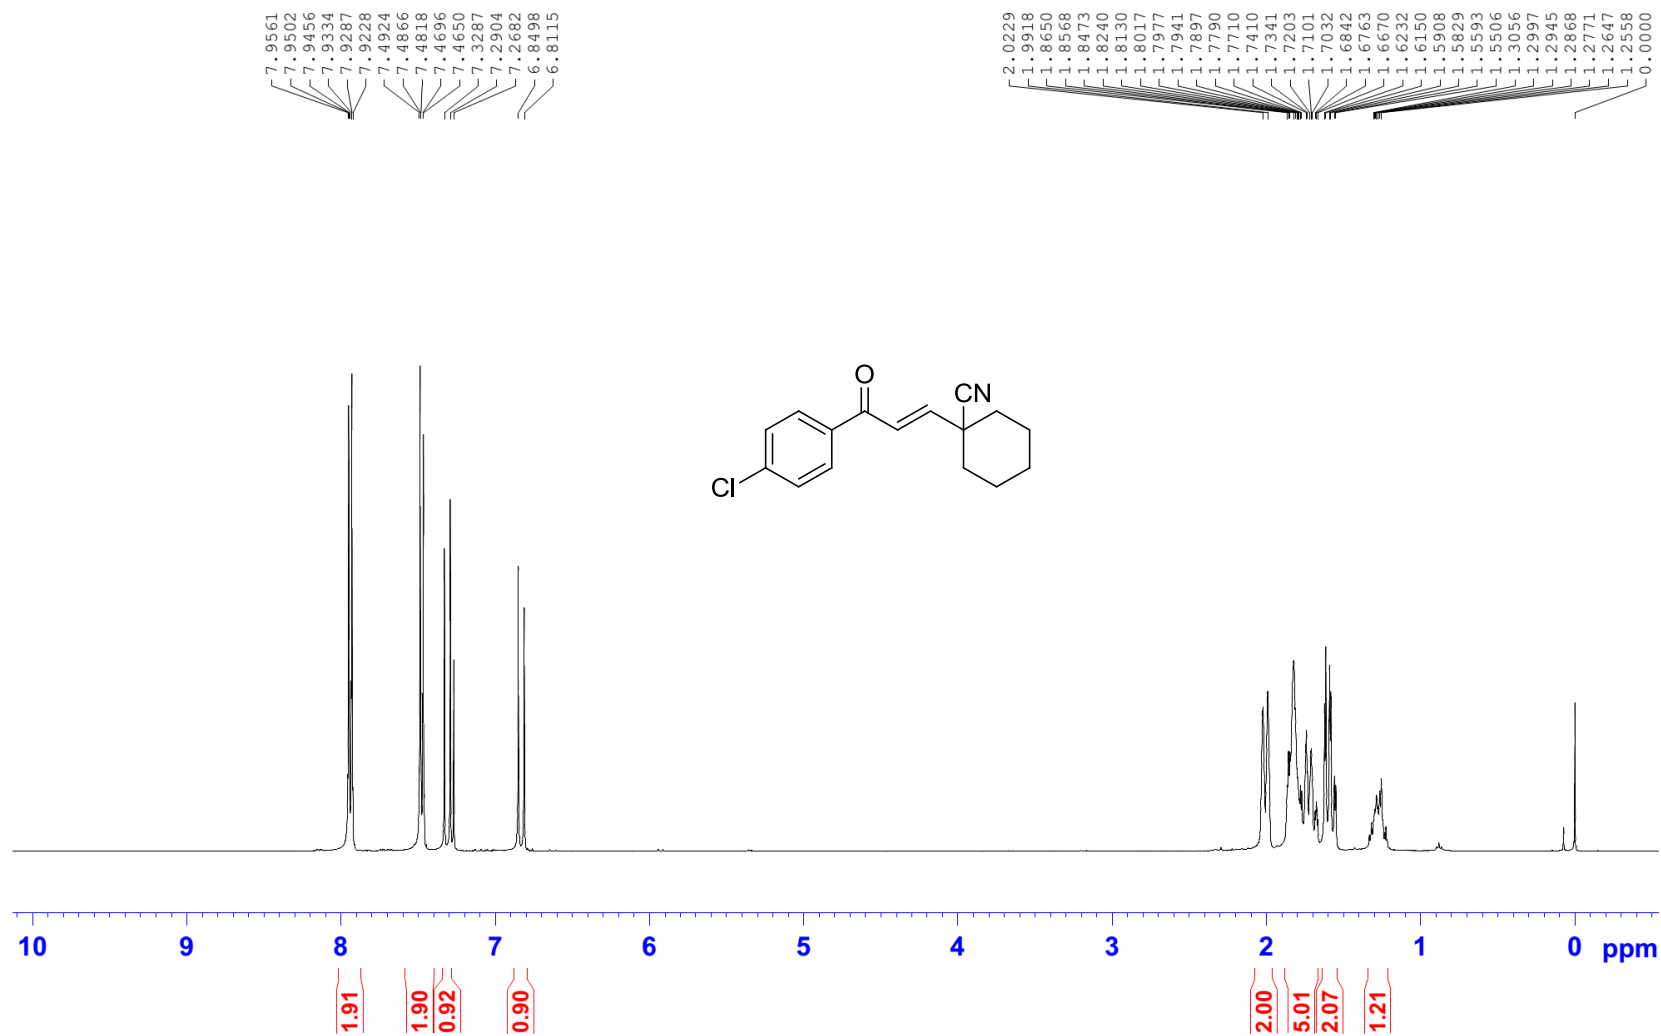



GB-131230-4-CNMR

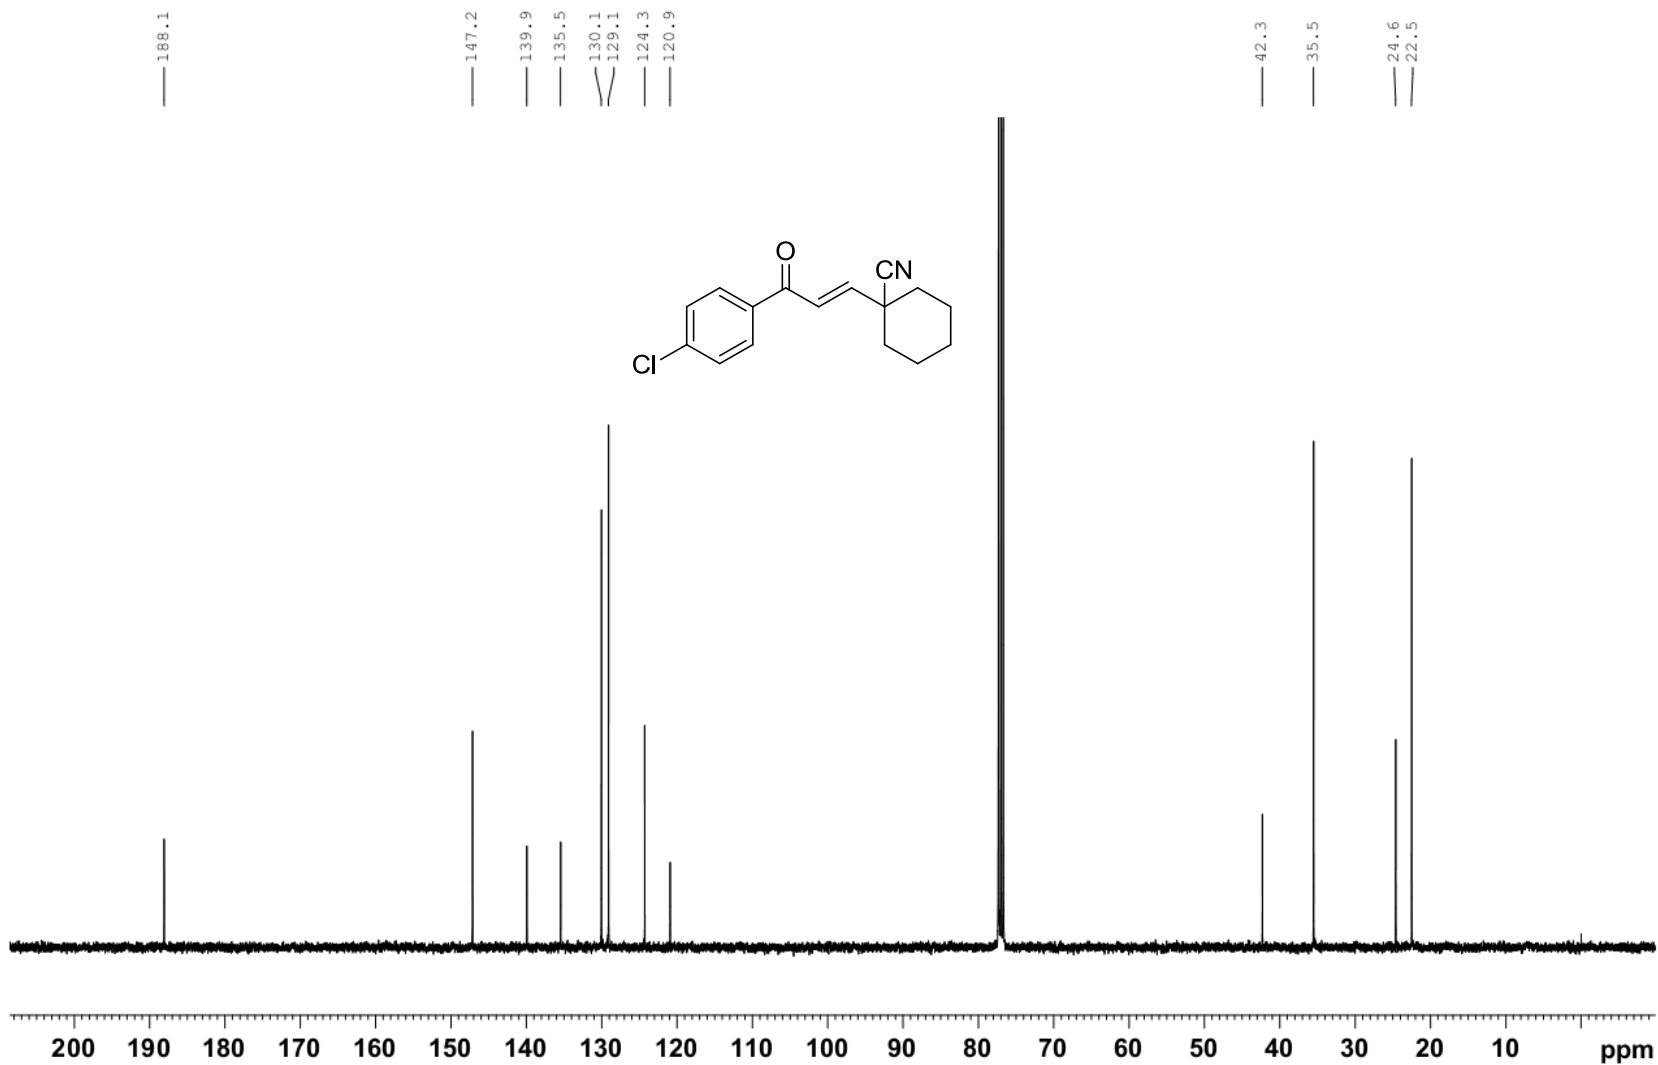

GB-X160113-1-HNMR

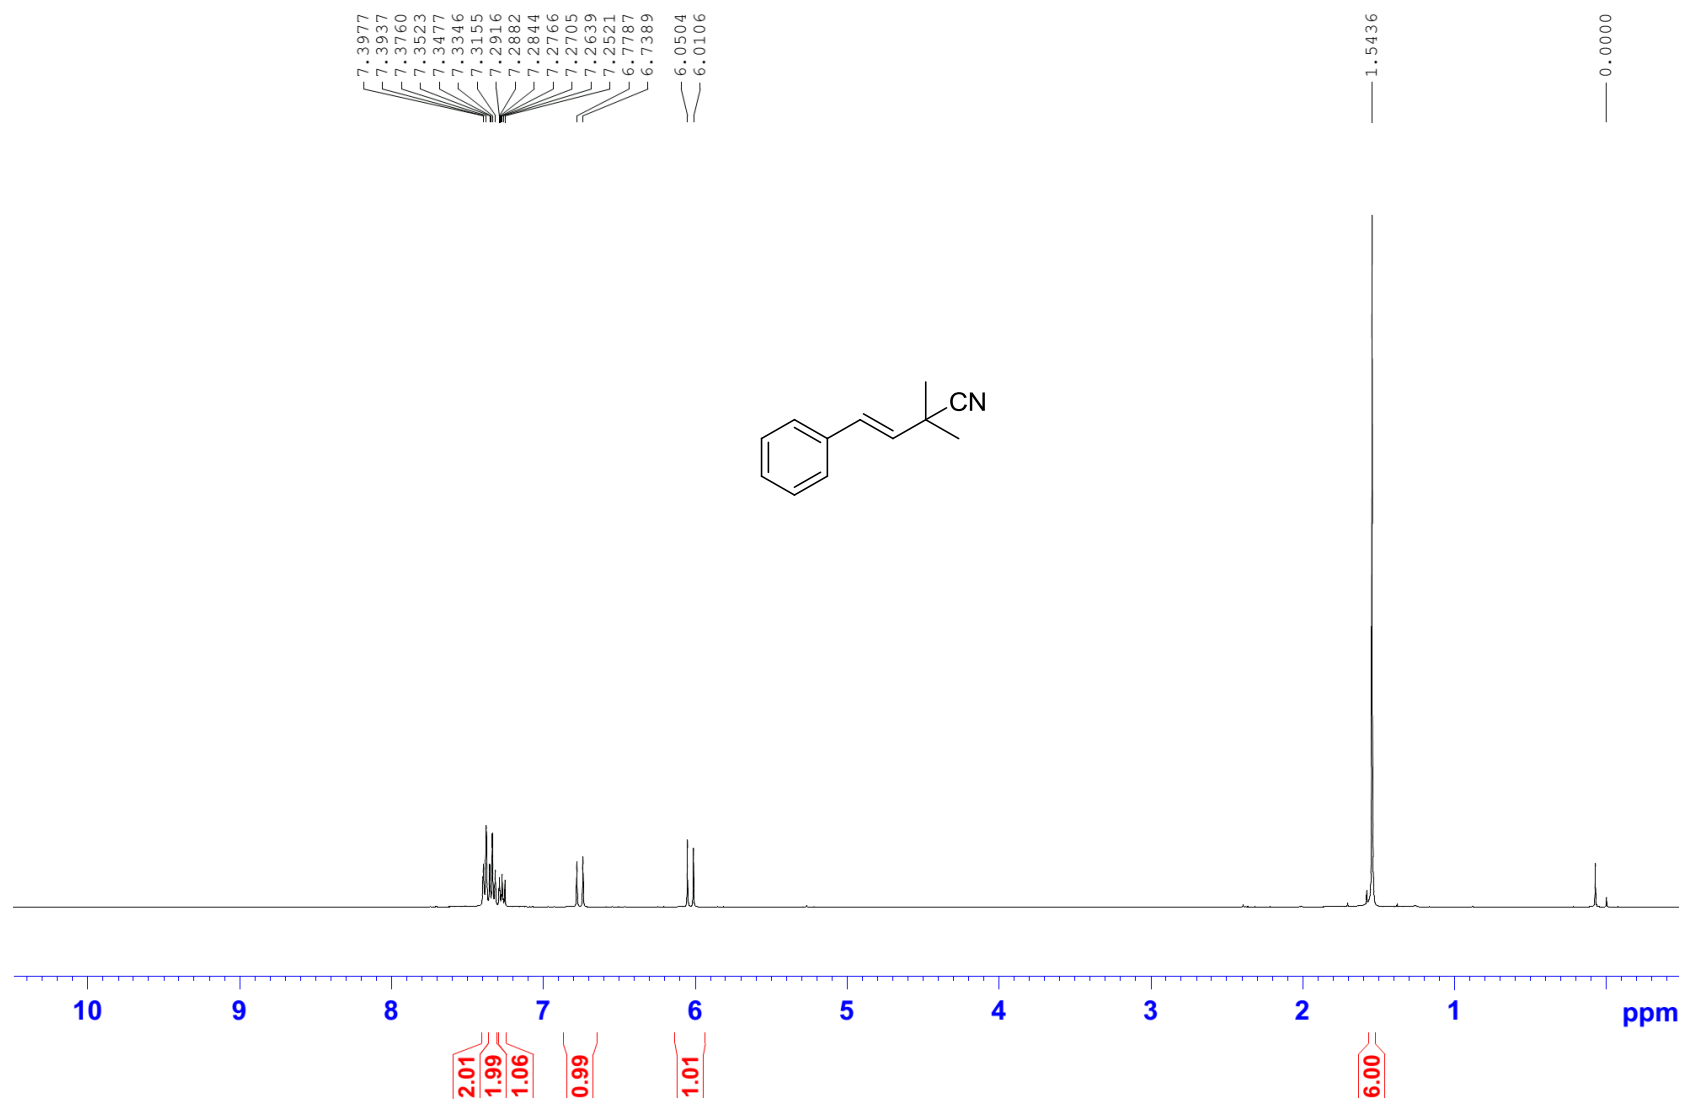

GB-X160113-1-CNMR

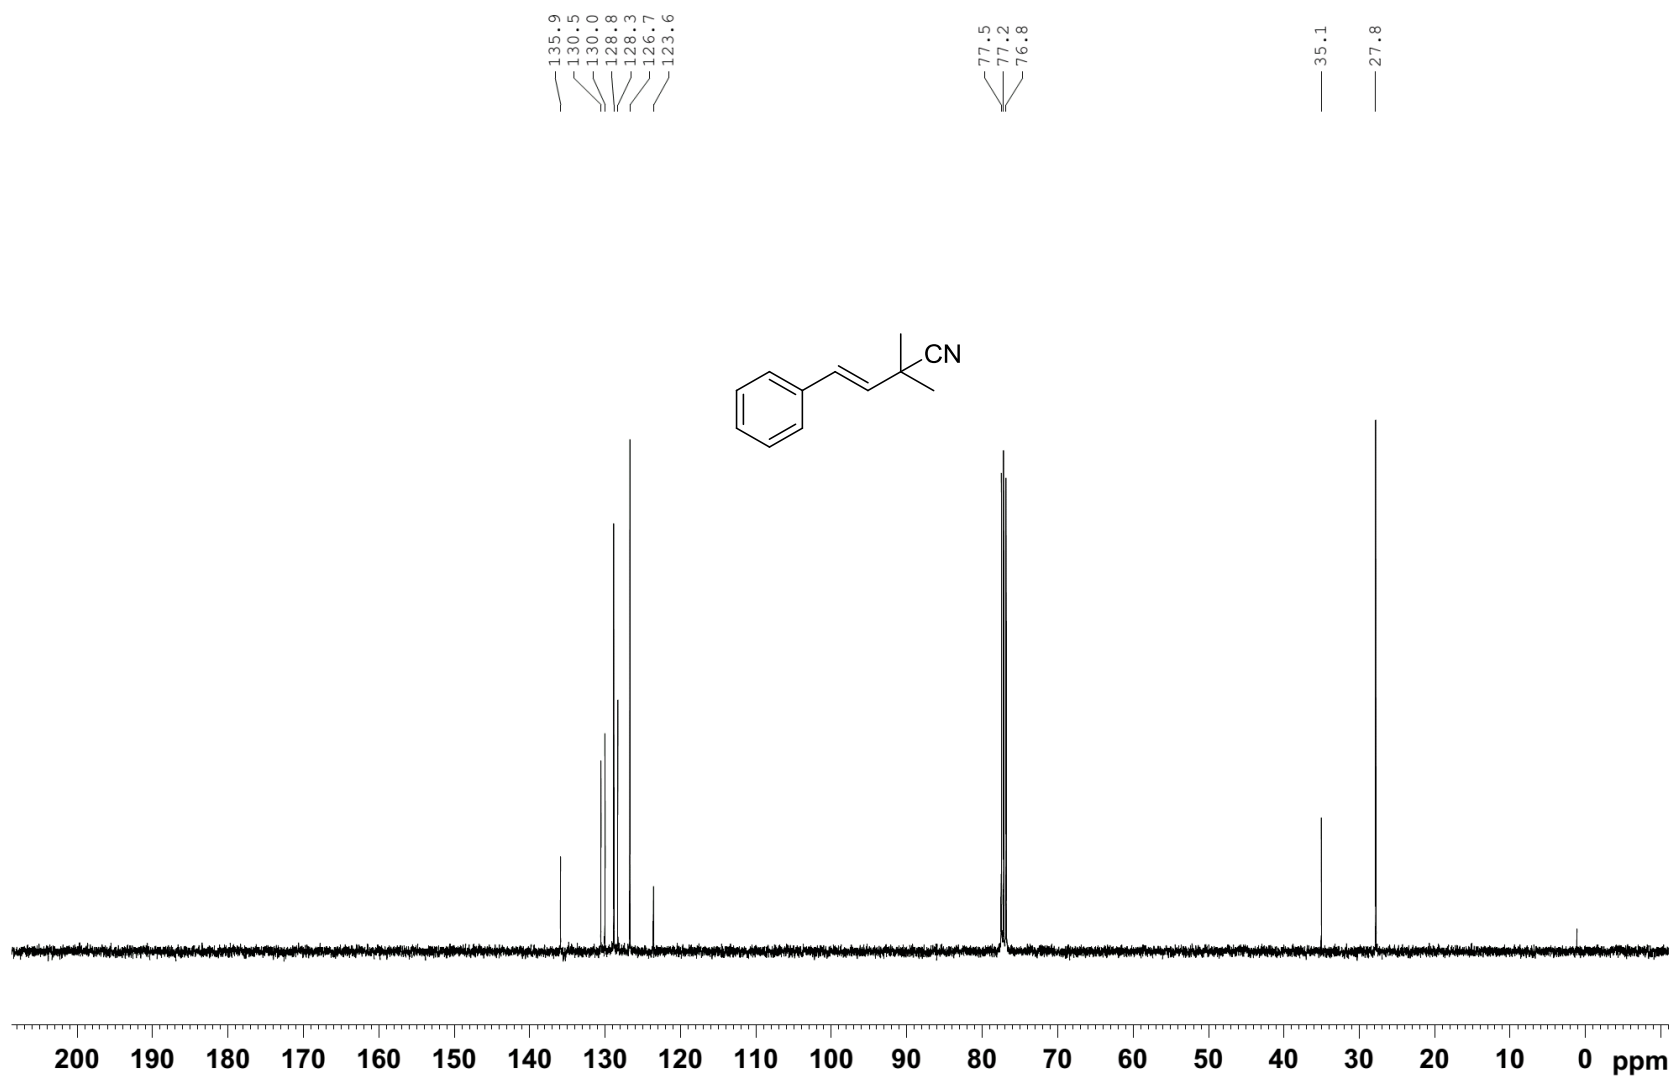

Supplement: c5ob02677f1.pdf [file c5ob02677f1.pdf]
